# Supplementary material
Source: publisher figshare collection journal article supplement (https://acs.figshare.com/ndownloader/files/5103208)
Supplement: Supplementary file 1 [file 5103208]

# Synthesis of 2'-C- $\beta$ -difluoromethylribonucleosides and enzymatic incorporation into oligonucleotides

*Jing-Dong Ye, Xiangmin Liao<sup>†</sup> and Joseph A. Piccirilli\**

Howard Hughes Medical Institute, Department of Biochemistry & Molecular Biology, and Department of Chemistry, the University of Chicago, 5841 S. Maryland Ave. MC 1028, Chicago, Illinois 60637

<sup>†</sup> Present address: GlaxoSmithKline, UP 1110, 1250 S. Collegeville Road, Collegeville, PA 19426

## Supporting Information

| Table of Contents                                  | Page |
|----------------------------------------------------|------|
| 1. <sup>1</sup> H NMR of <b>3</b>                  | S3   |
| 2. <sup>13</sup> C NMR of <b>3</b>                 | S4   |
| 3. <sup>19</sup> F- <sup>1</sup> H NOE of <b>3</b> | S5   |
| 4. <sup>1</sup> H NMR of <b>4</b>                  | S6   |
| 5. <sup>13</sup> C NMR of <b>4</b>                 | S7   |
| 6. <sup>1</sup> H NMR of <b>6</b>                  | S8   |
| 7. <sup>13</sup> C NMR of <b>6</b>                 | S9   |
| 8. <sup>19</sup> F- <sup>1</sup> H NOE of <b>6</b> | S10  |
| 9. NOESY of <b>6</b>                               | S11  |
| 10. <sup>1</sup> H NMR of <b>7</b>                 | S12  |
| 11. <sup>13</sup> C NMR of <b>7</b>                | S13  |
| 12. <sup>1</sup> H NMR of <b>8</b>                 | S14  |
| 13. NOESY of <b>8</b>                              | S15  |
| 14. <sup>1</sup> H NMR of <b>9a</b>                | S16  |
| 15. <sup>13</sup> C NMR of <b>9a</b>               | S17  |

|                                                                |     |
|----------------------------------------------------------------|-----|
| 16. NOESY of <b>9a</b>                                         | S18 |
| 17. <sup>1</sup> H NMR of <b>9b</b>                            | S19 |
| 18. <sup>13</sup> C NMR of <b>9b</b>                           | S20 |
| 19. NOESY of <b>9b</b>                                         | S21 |
| 20. <sup>1</sup> H NMR of <b>9c</b>                            | S22 |
| 21. <sup>1</sup> H NMR of <b>10a</b>                           | S23 |
| 22. <sup>13</sup> C NMR of <b>10a</b>                          | S24 |
| 23. <sup>1</sup> H NMR of <b>10b</b>                           | S25 |
| 24. <sup>1</sup> H NMR of <b>10c</b>                           | S26 |
| 25. <sup>1</sup> H NMR of <b>15</b>                            | S27 |
| 26. <sup>13</sup> C NMR of <b>15</b>                           | S28 |
| 27. <sup>1</sup> H NMR of <b>16</b>                            | S29 |
| 28. <sup>1</sup> H NMR of <b>17</b>                            | S30 |
| 29. <sup>1</sup> H NMR of <b>18</b>                            | S31 |
| 30. <sup>13</sup> C NMR of <b>18</b>                           | S32 |
| 31. <sup>1</sup> H NMR of <b>19a</b>                           | S33 |
| 32. <sup>13</sup> C NMR of <b>19a</b>                          | S34 |
| 33. NOESY of <b>19a</b>                                        | S35 |
| 34. <sup>1</sup> H NMR of <b>19b</b>                           | S36 |
| 35. <sup>1</sup> H NMR of <b>20a</b>                           | S37 |
| 36. <sup>13</sup> C NMR of <b>20a</b>                          | S38 |
| 37. <sup>1</sup> H NMR of <b>20b</b>                           | S39 |
| 38. <sup>1</sup> H NMR of <b>21</b>                            | S40 |
| 39. <sup>31</sup> P NMR of <b>21</b>                           | S41 |
| 40. MALDI mass spec of rCCGAAAU <sub>2</sub> CF <sub>2</sub> H | S42 |
| 41. P1 nuclease digestion                                      | S43 |

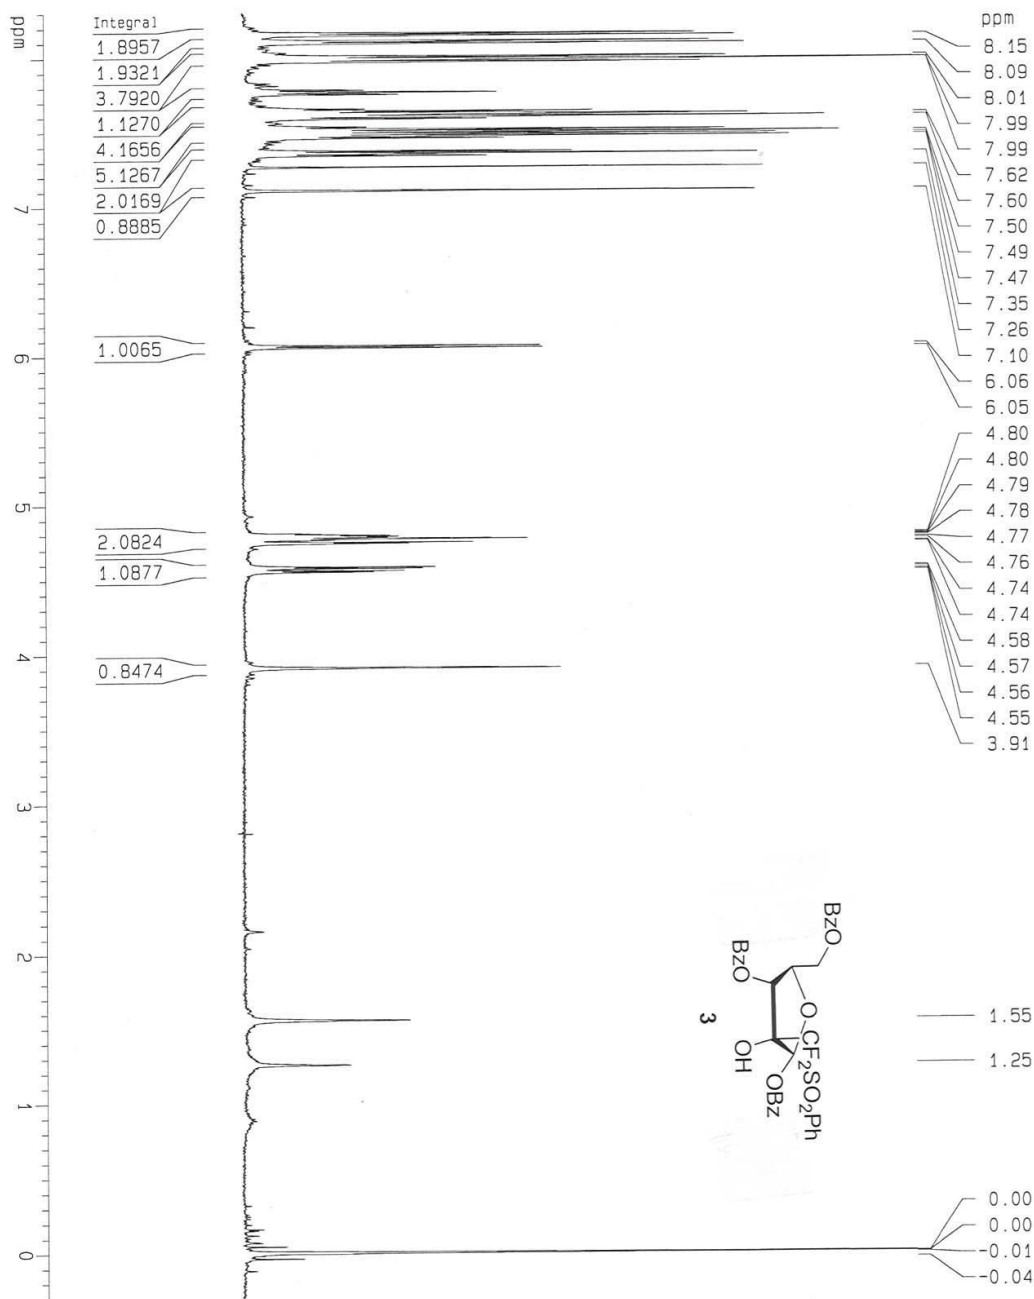

Current Data Parameters

|        |         |
|--------|---------|
| NAME   | jy0122a |
| EXPNO  | 1       |
| PROCNO | 1       |

F2 - Acquisition Parameters

|         |                |
|---------|----------------|
| Date_   | 20020122       |
| Time    | 15.29          |
| INSTRUM | spect          |
| PROBHD  | 5 mm QNP 1H    |
| PULPROG | zg             |
| TD      | 32768          |
| SOLVENT | CDCl3          |
| NS      | 8              |
| DS      | 0              |
| SWH     | 6009.615 Hz    |
| FIDRES  | 0.183399 Hz    |
| AQ      | 2.7263477 sec  |
| RG      | 256            |
| DM      | 83.200 usec    |
| DE      | 4.50 usec      |
| TE      | 300.0 K        |
| D1      | 2.00000000 sec |

===== CHANNEL f1 =====

|      |                 |
|------|-----------------|
| NUC1 | 1H              |
| P1   | 10.00 usec      |
| PL1  | 0.00 dB         |
| SFO1 | 500.1320118 MHz |

F2 - Processing parameters

|     |                 |
|-----|-----------------|
| SI  | 16384           |
| SF  | 500.1300131 MHz |
| WDW | EM              |
| SSB | 0               |
| LB  | 0.30 Hz         |
| GB  | 0               |
| PC  | 1.00            |

1D NMR plot parameters

|       |                 |
|-------|-----------------|
| CX    | 20.00 cm        |
| FJP   | 8.300 ppm       |
| F1    | 4151.08 Hz      |
| F2P   | -0.300 ppm      |
| F2    | -150.04 Hz      |
| PPMCM | 0.43000 ppm/cm  |
| HZCM  | 215.05591 Hz/cm |

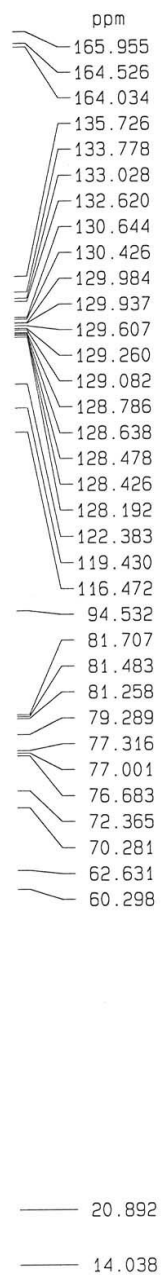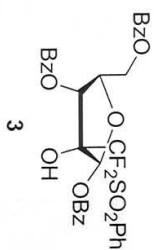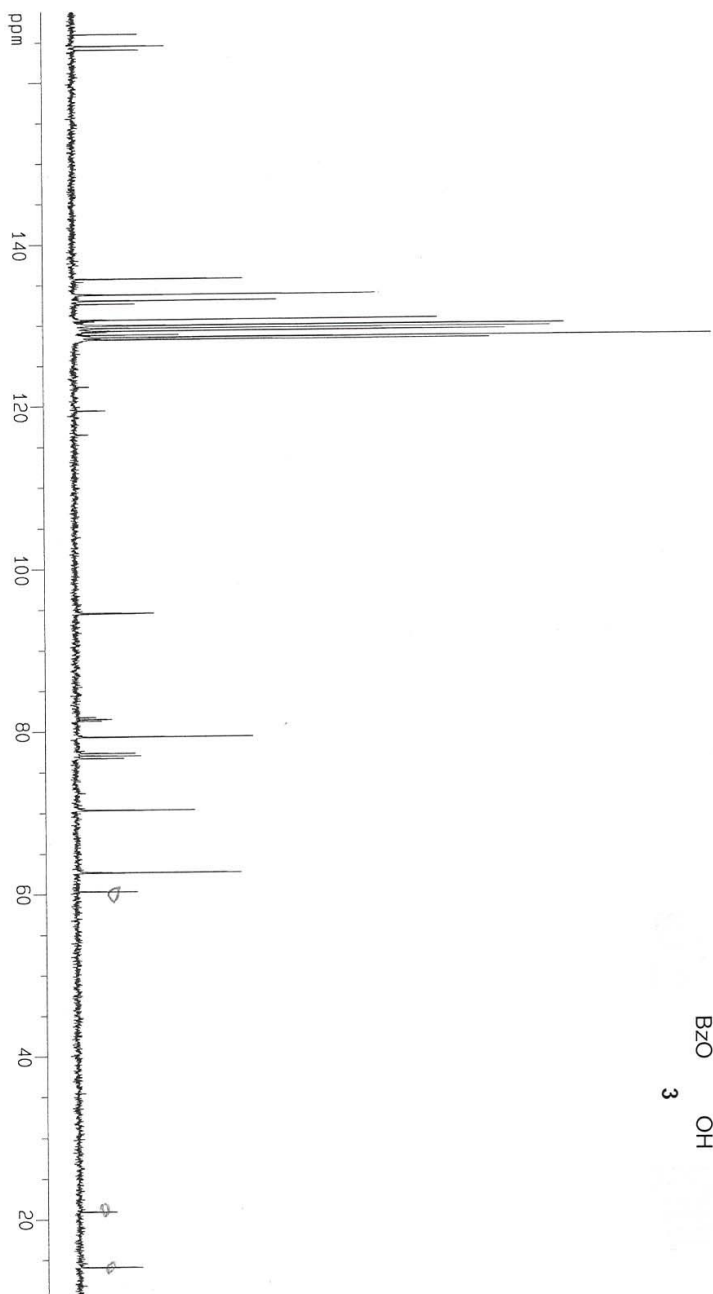

```

Current Data Parameters
NAME          A136C
EXPNO         1
PROCNO        1

F2 - Acquisition Parameters
Date_         20050611
Time          16.11
INSTRUM       spect
PROBHD        5 mm QNP 1H
PULPROG       zgpg
TD            32768
SOLVENT       CDCl3
NS            101
DS            0
SMH           271.00 27.1 Hz
FIDRES        0.827035 Hz
AQ            0.6046196 sec
RG            2298.8
DM            18.450 usec
DE            7.50 usec
TE            300.0 K
D1            3.00000000 sec
d11           0.03000000 sec

===== CHANNEL f1 =====
NUC1          13C
P1            11.00 usec
PL1           -2.00 dB
SF01          100.6254368 MHz

===== CHANNEL f2 =====
CPDPRG2       waltz16
NUC2          1H
PCPD2         101.00 usec
PL2           120.00 dB
PL12          19.00 dB
SF02          400.1324710 MHz

F2 - Processing parameters
SI            16384
SF            100.6127859 MHz
WDW           EM
SSB           0
LB            0
GB            0
PC            1.00

10 NMR plot parameters
CX            20.00 cm
F1P           168.766 ppm
F1            16580.00 Hz
F2P           10.668 ppm
F2            1073.32 Hz
PPMCK         7.90469 ppm/cm
HZCM          795.33405 Hz/cm

```

Current Data Parameters  
NAME h119A37  
EXPNO 5  
PROCNO 2

F2 - Acquisition Parameters  
Date\_ 20021107  
Time 16.24

INSTRUM spect  
PROBHD 5 mm QNP 1H  
PULPROG zgpg30  
TD 65536  
SOLVENT CDCl3  
NS 400  
DS 4  
SWH 1965.409 Hz  
FIDRES 0.418350 Hz  
AQ 1.195212 sec  
RG 71.8  
DM 254.400 usec  
DE 4.50 usec  
TE 300.0 K  
D1 2.00000000 sec  
d11 0.03000000 sec  
d12 0.00020000 sec  
D20 3.00000000 sec  
L4 5

===== CHANNEL f1 =====  
NUC1 1H  
P1 10.50 usec  
PL1 0.00 dB  
SFO1 400.1324422 MHz

===== CHANNEL f2 =====  
COPROG2 mlev16  
F0LIST1 jyg-1  
F0LIST2 jyg-1  
NUC2 19F  
PCPD2 100.00 usec  
PL2 120.00 dB  
PL12 24.00 dB  
PL14 54.00 dB  
SFO2 376.4120598 MHz

F2 - Processing parameters  
SI 32768  
SF 400.1300177 MHz  
WDW EM  
SSB 0  
LB 0.30 Hz  
GB 0  
PC 1.00

1D NMR plot parameters  
CX 20.00 cm  
F1P 8.515 ppm  
F1 3407.24 Hz  
F2P 3.603 ppm  
F2 1441.83 Hz  
PPMCM 0.24560 ppm/cm  
HZCM 98.27043 Hz/cm

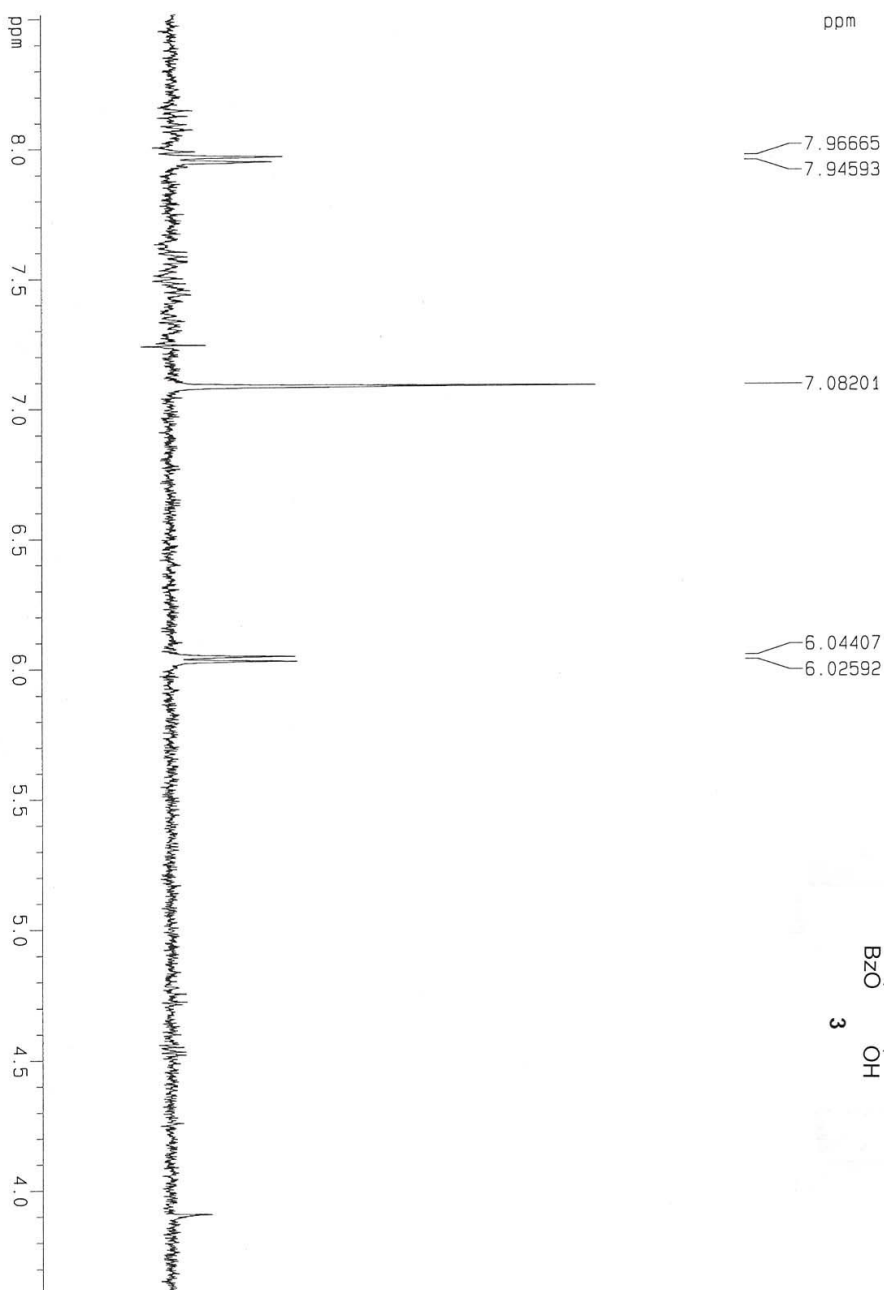

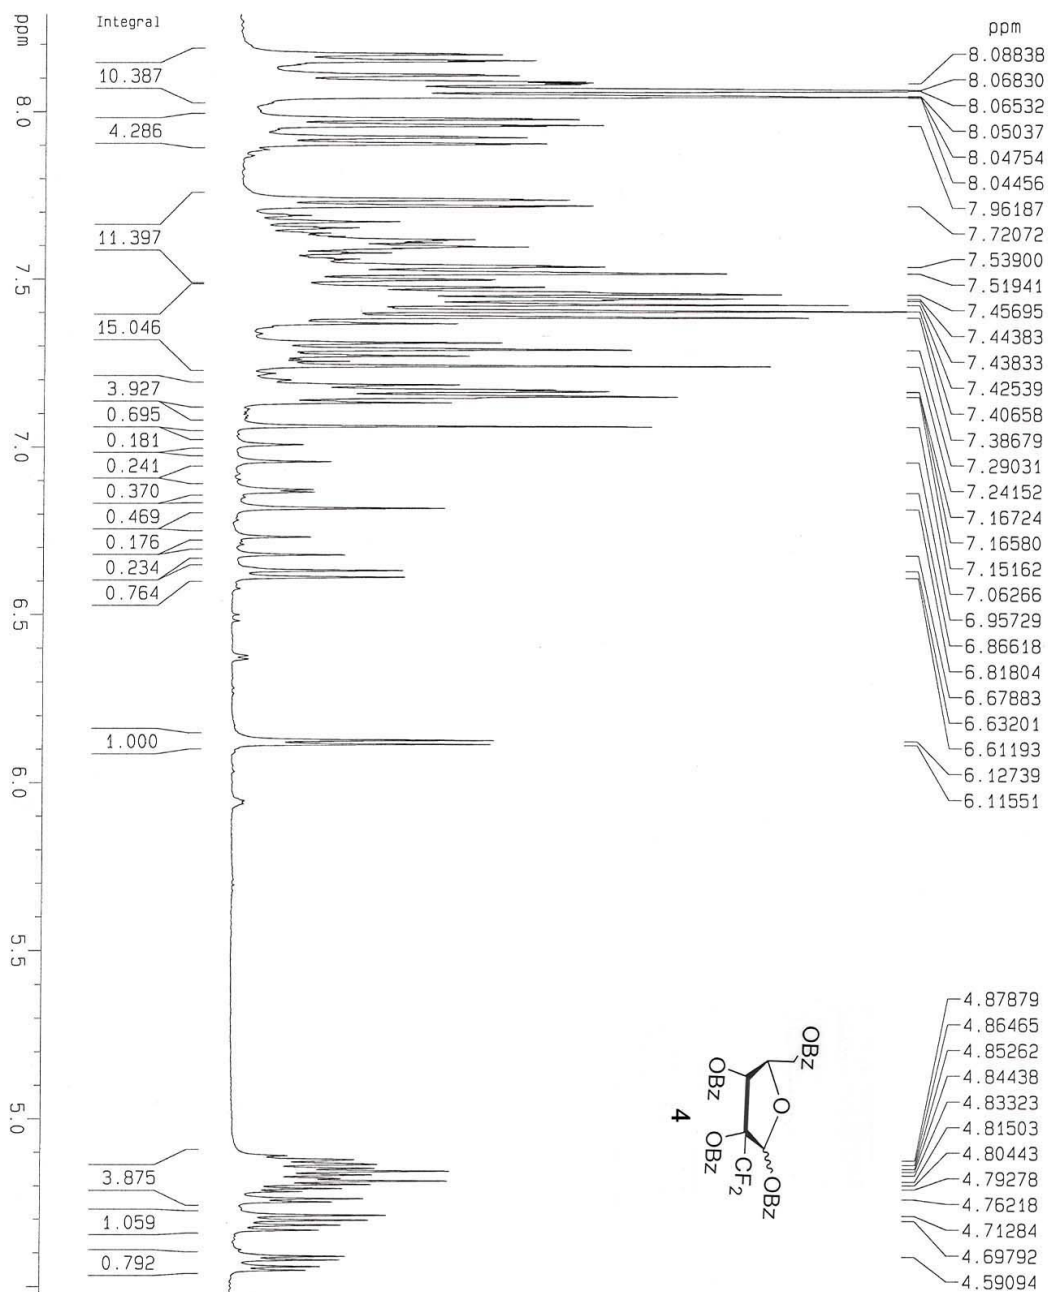

Current Data Parameters  
NAME A147  
EXPNO 1  
PROCNO 1

F2 - Acquisition Parameters  
Date\_ 20020617  
Time 18.04  
INSTRUM spect  
PROBHD 5 mm GNP 1H  
PULPROG zg  
TD 32768  
SOLVENT CDCl3  
NS 4  
DS 0  
SWH 4194.634 Hz  
FIDRES 0.128010 Hz  
AQ 3.905956 sec  
RG 32  
DM 119.200 usec  
DE 4.50 usec  
TE 300.0 K  
D1 2.00000000 sec

===== CHANNEL f1 =====  
NUC1 1H  
P1 10.50 usec  
PL1 0.00 dB  
SFO1 400.1319246 MHz

F2 - Processing parameters  
SI 16384  
SF 400.1300116 MHz  
WDW EM  
SSB 0  
LB 0.30 Hz  
GB 0  
PC 1.00

1D NMR plot parameters  
CX 20.00 cm  
F1P 8.292 ppm  
F1 3317.69 Hz  
F2P 4.481 ppm  
F2 1792.65 Hz  
PPMCM 0.19054 ppm/cm  
HZCM 76.24203 Hz/cm

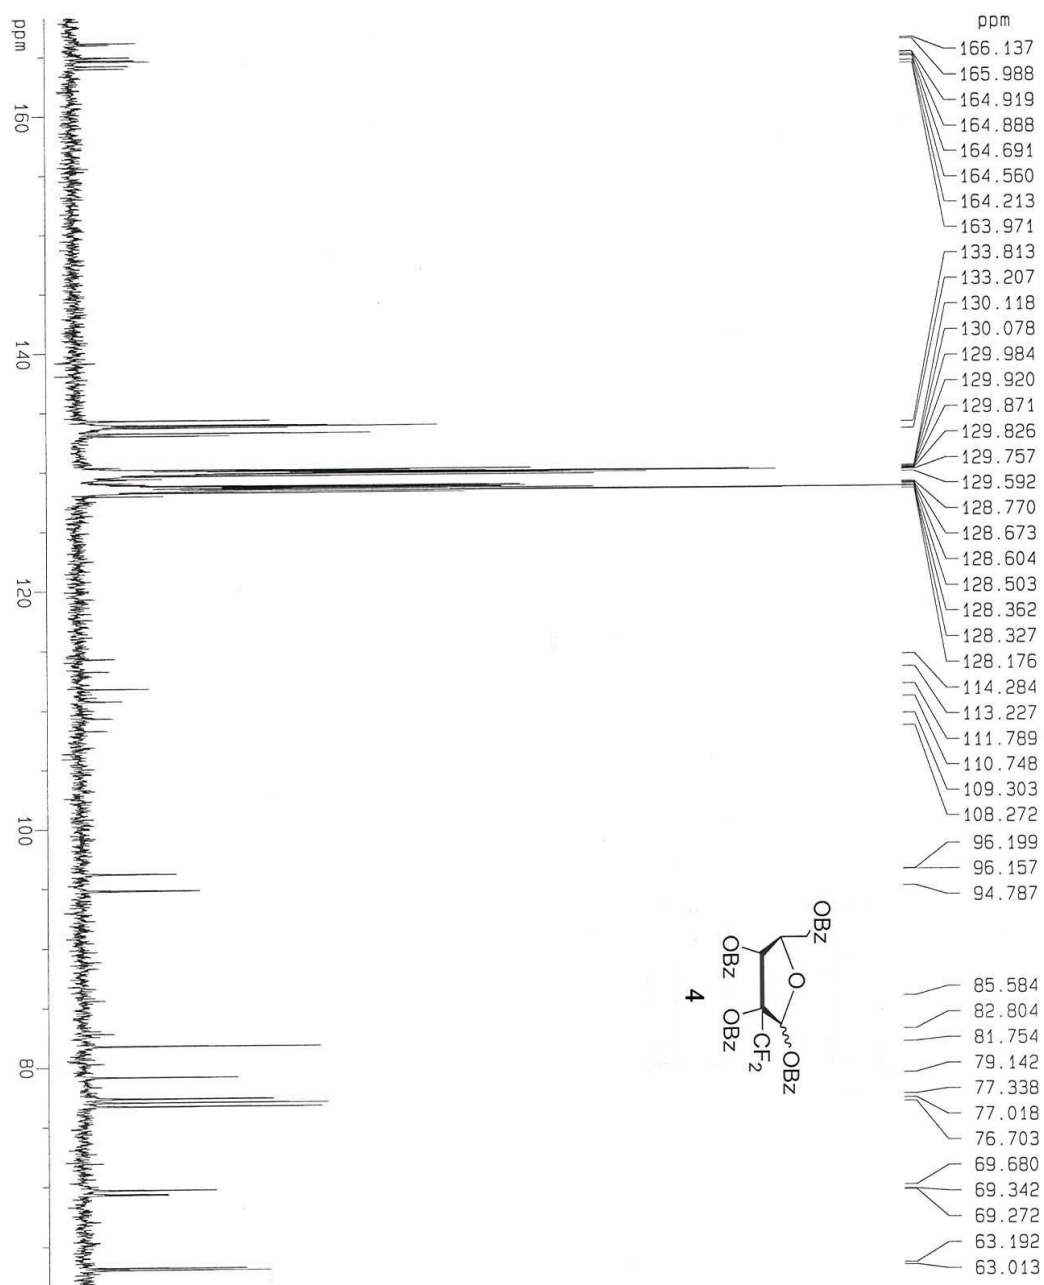

Current Data Parameters

|        |        |
|--------|--------|
| NAME   | A147.C |
| EXPNO  | 1      |
| PROCNO | 1      |

F2 - Acquisition Parameters

|         |                |
|---------|----------------|
| Date_   | 20020617       |
| Time    | 18.17          |
| INSTRUM | spect          |
| PROBHD  | 5 mm QNP 1H    |
| PULPROG | zgpg30         |
| TD      | 32768          |
| SOLVENT | CDCl3          |
| NS      | 428            |
| DS      | 0              |
| SWH     | 27100.271 Hz   |
| FIDRES  | 0.927035 Hz    |
| AQ      | 0.6046196 sec  |
| RG      | 1149.4         |
| DW      | 18.450 usec    |
| DE      | 7.50 usec      |
| TE      | 300.0 K        |
| D1      | 3.00000000 sec |
| d11     | 0.03000000 sec |

===== CHANNEL f1 =====

|      |                 |
|------|-----------------|
| NUC1 | <sup>13</sup> C |
| P1   | 11.00 usec      |
| PL1  | -2.00 dB        |
| SFO1 | 100.6254358 MHz |

===== CHANNEL f2 =====

|         |                 |
|---------|-----------------|
| CPDPRG2 | waltz16         |
| NUC2    | <sup>1</sup> H  |
| PCPD2   | 101.00 usec     |
| PL2     | 120.00 dB       |
| PL12    | 19.00 dB        |
| SFO2    | 400.1324710 MHz |

F2 - Processing parameters

|     |                 |
|-----|-----------------|
| SI  | 16384           |
| SF  | 100.6127760 MHz |
| KDN | EM              |
| SSB | 0               |
| LB  | 1.00 Hz         |
| GB  | 0               |
| PC  | 1.00            |

1D NMR plot parameters

|       |                 |
|-------|-----------------|
| CX    | 20.00 cm        |
| F1P   | 168.307 ppm     |
| F1    | 169.93382 Hz    |
| F2P   | 61.574 ppm      |
| F2    | 61.95115 Hz     |
| PPMCM | 5.33564 ppm/cm  |
| HZCM  | 536.93378 Hz/cm |

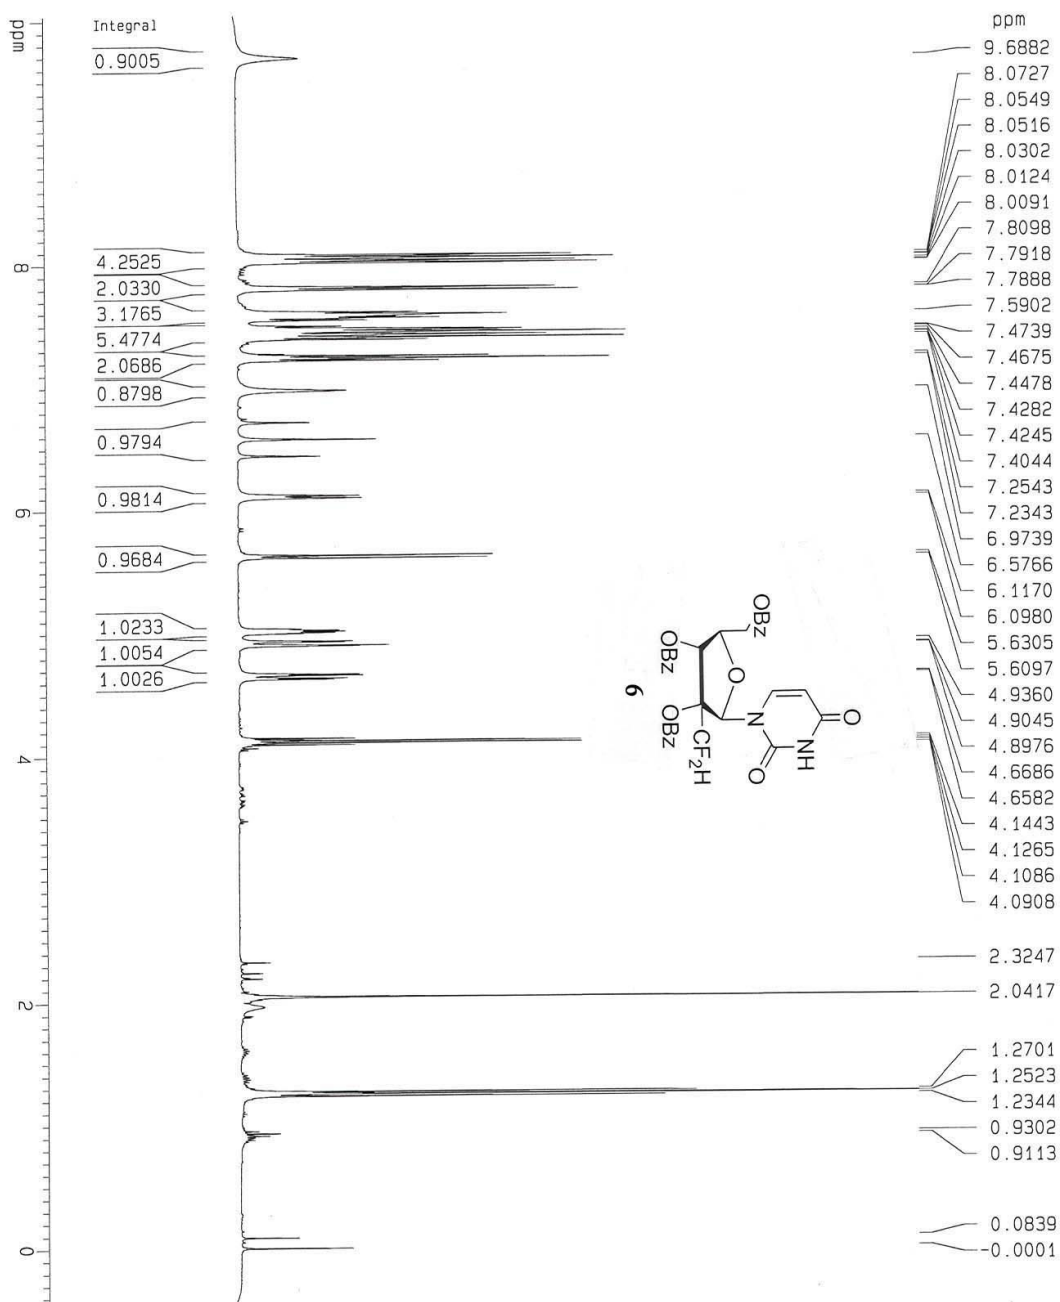

Current Data Parameters

|        |     |
|--------|-----|
| NAME   | B19 |
| EXPNO  | 1   |
| PROCNO | 1   |

F2 - Acquisition Parameters

|         |                |
|---------|----------------|
| Date_   | 20020703       |
| Time    | 15.45          |
| INSTRUM | spect          |
| PROBHD  | 5 mm QNP 1H    |
| PULPROG | zg             |
| TD      | 32768          |
| SOLVENT | CDCl3          |
| NS      | 4              |
| DS      | 0              |
| SWH     | 4194.631 Hz    |
| FIDRES  | 0.128010 Hz    |
| AQ      | 3.9059956 sec  |
| RG      | 22.6           |
| DW      | 119.200 usec   |
| DE      | 4.50 usec      |
| TE      | 300.0 K        |
| D1      | 2.00000000 sec |

===== CHANNEL f1 =====

|      |                 |
|------|-----------------|
| NUC1 | <sup>1</sup> H  |
| P1   | 10.50 usec      |
| PL1  | 0.00 dB         |
| SFO1 | 400.1319246 MHz |

F2 - Processing parameters

|     |                |
|-----|----------------|
| SI  | 16384          |
| SF  | 400.130057 MHz |
| WDW | EM             |
| SSB | 0              |
| LB  | 0.30 Hz        |
| GB  | 0              |
| PC  | 1.00           |

1D NMR plot parameters

|       |                 |
|-------|-----------------|
| CX    | 20.00 cm        |
| F1P   | 10.037 ppm      |
| F1    | 4016.18 Hz      |
| F2P   | -0.446 ppm      |
| F2    | -178.45 Hz      |
| PPMCM | 0.52416 ppm/cm  |
| HZCM  | 209.73154 Hz/cm |

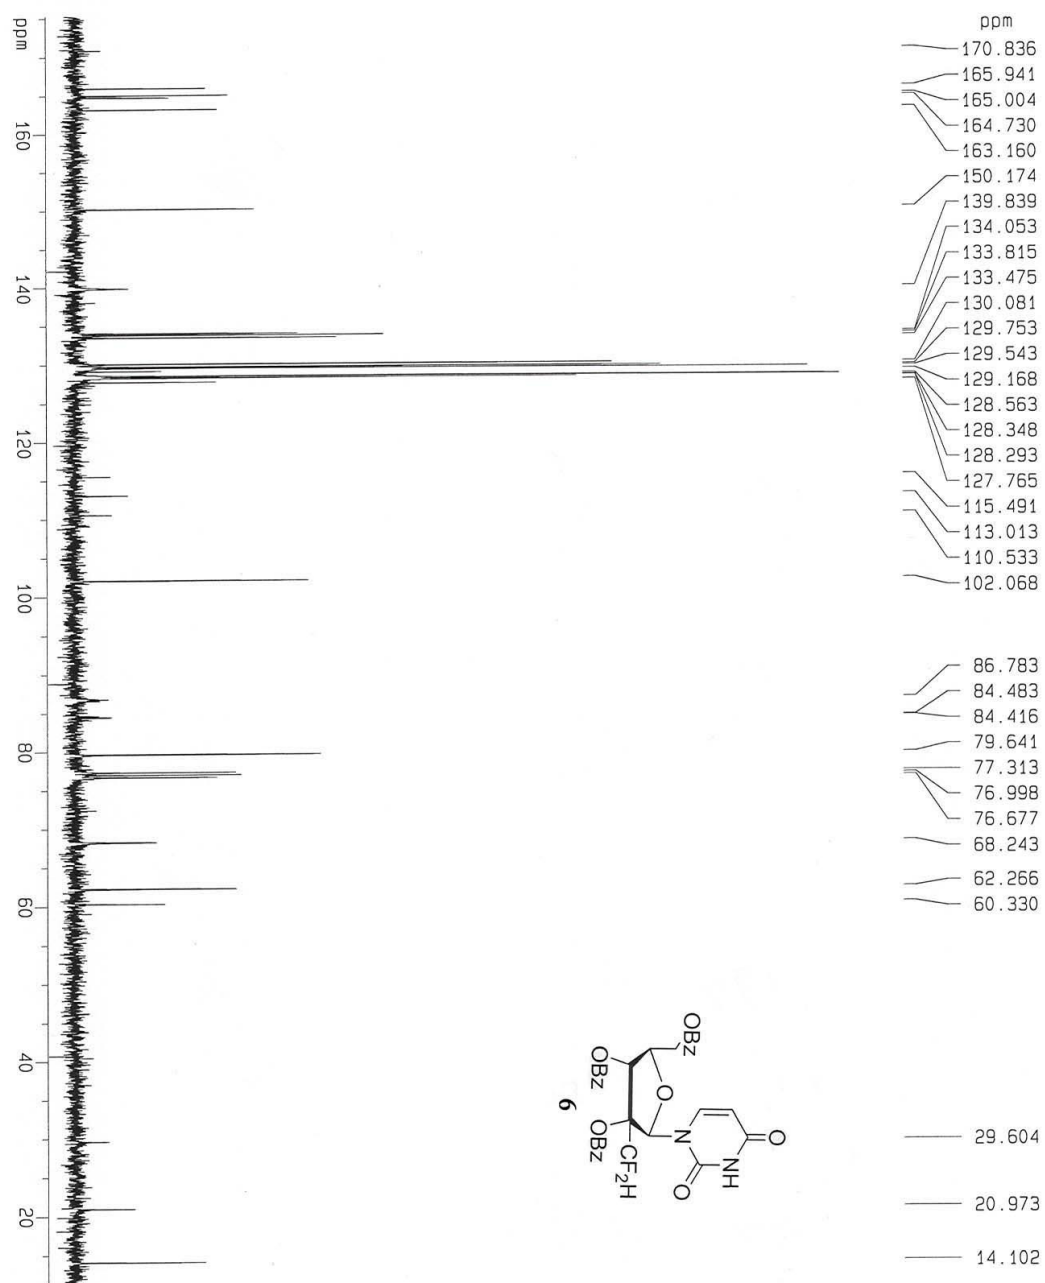

Current Data Parameters

| NAME  | EXPNO | PROCNO |
|-------|-------|--------|
| B19_C | 1     | 1      |

F2 - Acquisition Parameters

| Date_    | Time  | INSTRUM | PROBHD      | PULPROG | TO    | SOLVENT | NS  | DS | SWH          | FIDRES      | AQ            | RG     | DM          | DE        | TE      | D1             | d11            |
|----------|-------|---------|-------------|---------|-------|---------|-----|----|--------------|-------------|---------------|--------|-------------|-----------|---------|----------------|----------------|
| 20020703 | 15.29 | spect   | 5 mm GNP 1H | zgpg    | 32768 | CDCl3   | 158 | 0  | 27100.271 Hz | 0.827035 Hz | 0.6046196 sec | 1149.4 | 18.450 usec | 7.50 usec | 300.0 K | 3.00000000 sec | 0.03000000 sec |

===== CHANNEL f1 =====

| NUC1 | P1         | SFO1            |
|------|------------|-----------------|
| 13C  | 11.00 usec | 100.6254358 MHz |

===== CHANNEL f2 =====

| CPDPRG2 | NUC2 | PCPD2       | PL2       | PL12     | SFO2            |
|---------|------|-------------|-----------|----------|-----------------|
| waltz16 | 1H   | 101.00 usec | 120.00 dB | 19.00 dB | 400.1364710 MHz |

F2 - Processing parameters

| SI    | SF              | KDM | SSB | LB      | GB | PC   |
|-------|-----------------|-----|-----|---------|----|------|
| 16384 | 100.6127793 MHz | EM  | 0   | 1.00 Hz | 0  | 1.00 |

1D NMR plot parameters

| CX       | F1p         | F1          | F2p        | F2         | PPMCM          | HZCM            |
|----------|-------------|-------------|------------|------------|----------------|-----------------|
| 20.00 cm | 175.273 ppm | 17634.66 Hz | 11.319 ppm | 1138.84 Hz | 8.19767 ppm/cm | 824.79071 Hz/cm |

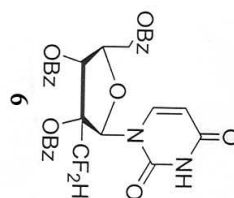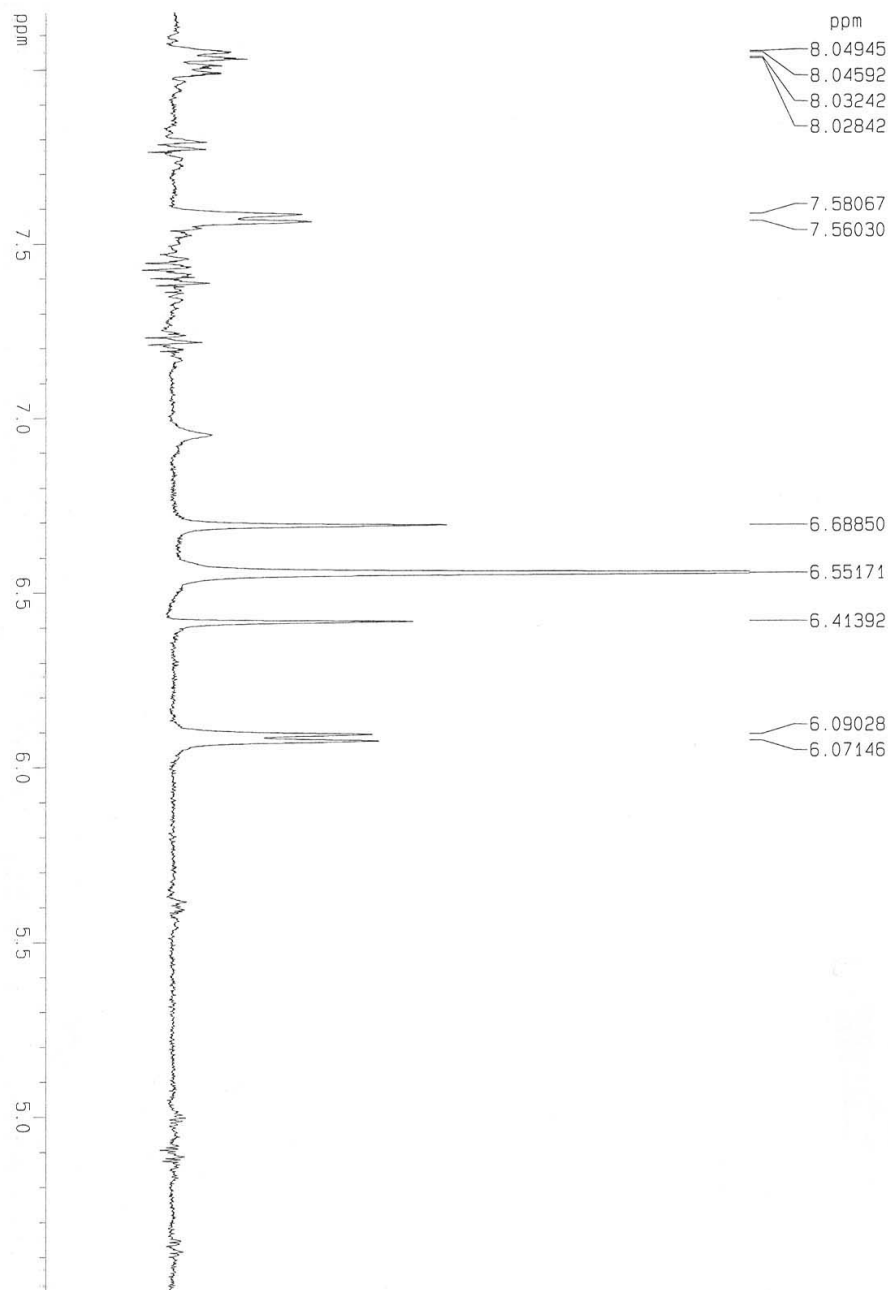

Current Data Parameters  
NAME h1f19816  
EXPNO 5  
PROCNO 2

F2 - Acquisition Parameters  
Date\_ 20021205  
Time 15.50  
INSTRUM spect  
PROBHD 5 mm QNP 1H  
PULPROG zgpg30  
TO 4698  
SOLVENT CDCl3  
NS 4  
DS 4  
SWH 1614.987 Hz  
FIDRES 0.343761 Hz  
AQ 1.4545507 sec  
RG 71.8  
DW 309.600 usec  
DE 4.50 usec  
TE 300.0 K  
D1 2.00000000 sec  
d11 0.03000000 sec  
d12 0.0002000 sec  
D20 3.00000000 sec  
L4 1

===== CHANNEL f1 =====  
NUC1 1H  
P1 10.50 usec  
PL1 0.00 dB  
SF01 400.1325855 MHz

===== CHANNEL f2 =====  
CPOPRG2 mlev16  
FOI1IST jya.1  
FQ2LIST jya.1  
NUC2 19F  
PCPD2 100.00 usec  
PL2 120.00 dB  
PL12 24.00 dB  
PL14 60.00 dB  
SF02 376.4120598 MHz

F2 - Processing parameters  
SI 32768  
SF 400.1300177 MHz  
WDW EM  
SSB 0  
LB 0.30 Hz  
GB 0  
PC 1.00

1D NMR plot parameters  
CX 20.00 cm  
F1P 8.164 ppm  
F1 3266.52 Hz  
F2P 4.500 ppm  
F2 1800.74 Hz  
PPMCH 0.18316 ppm/cm  
HZCM 73.28981 Hz/cm

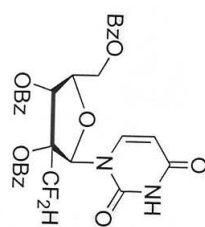

B23\_noesy

Current Data Parameters  
NAME B23\_2d  
EXPNO 3  
PROCNO 1

F2 - Acquisition Parameters  
Date\_ 20020805  
Time 17.44

INSTRUM spect  
PROBHD 5 mm Mxltinu  
PULPROG noesy1d  
TD 2048  
SOLVENT CDCl<sub>3</sub>  
NS 18  
DS 16  
SWH 1893.934 Hz  
FIDRES 0.924775 Hz  
AQ 0.5407220 sec  
RG 20  
DM 264.000 usec  
DE 4.50 usec  
TE 300.0 K  
D0 0.00000300 sec  
d0 2.00000000 sec  
D8 0.75000000 sec  
INO 0.0025400 sec

\*\*\*\*\* CHANNEL f1 \*\*\*\*\*  
NUC1 <sup>1</sup>H  
P1 1.00 usec  
PL1 0.00 dB  
SFO1 500.1332065 MHz

F1 - Acquisition Parameters  
ND0 2  
TD 256  
SFO1 500.1332 MHz  
FIDRES 7.398201 Hz  
SW 3.787 ppm

F2 - Processing Parameters  
SI 2048  
SF 500.1330114 MHz  
WDW GSSINE  
SSB 0  
LB 0.00 Hz  
GB 0  
PC 1.00

F1 - Processing Parameters  
SI 1024  
MC2 TPPI  
SF 500.1330114 MHz  
WDW GSSINE  
SSB 2  
LB 0.00 Hz  
GB 0

2D NMR plot parameters  
CY2 15.00 cm  
CX1 15.00 cm  
F2PUL 7.100 ppm  
F2LO 3551.11 Hz  
F2PHI 4.493 ppm  
F2H1 2247.18 Hz  
F1PUL 7.102 ppm  
F1LO 3552.04 Hz  
F1PHI 4.491 ppm  
F1H1 2246.25 Hz  
F2PCKM 0.17381 dBV/cm  
F2QCKM 66.92865 Hz/cm  
F1PCKM 0.17405 dBV/cm  
F1QCKM 67.02216 Hz/cm

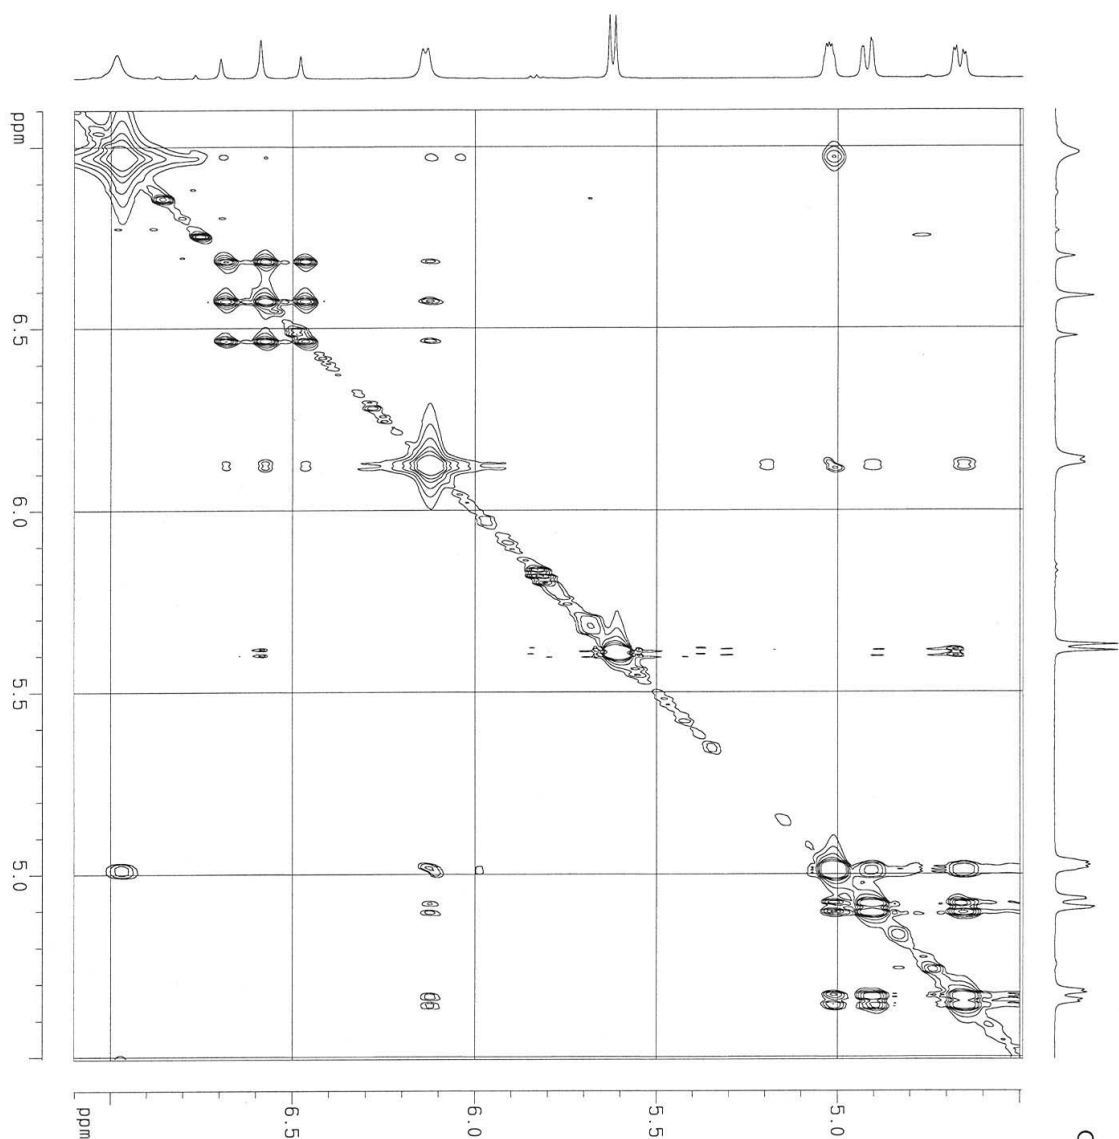

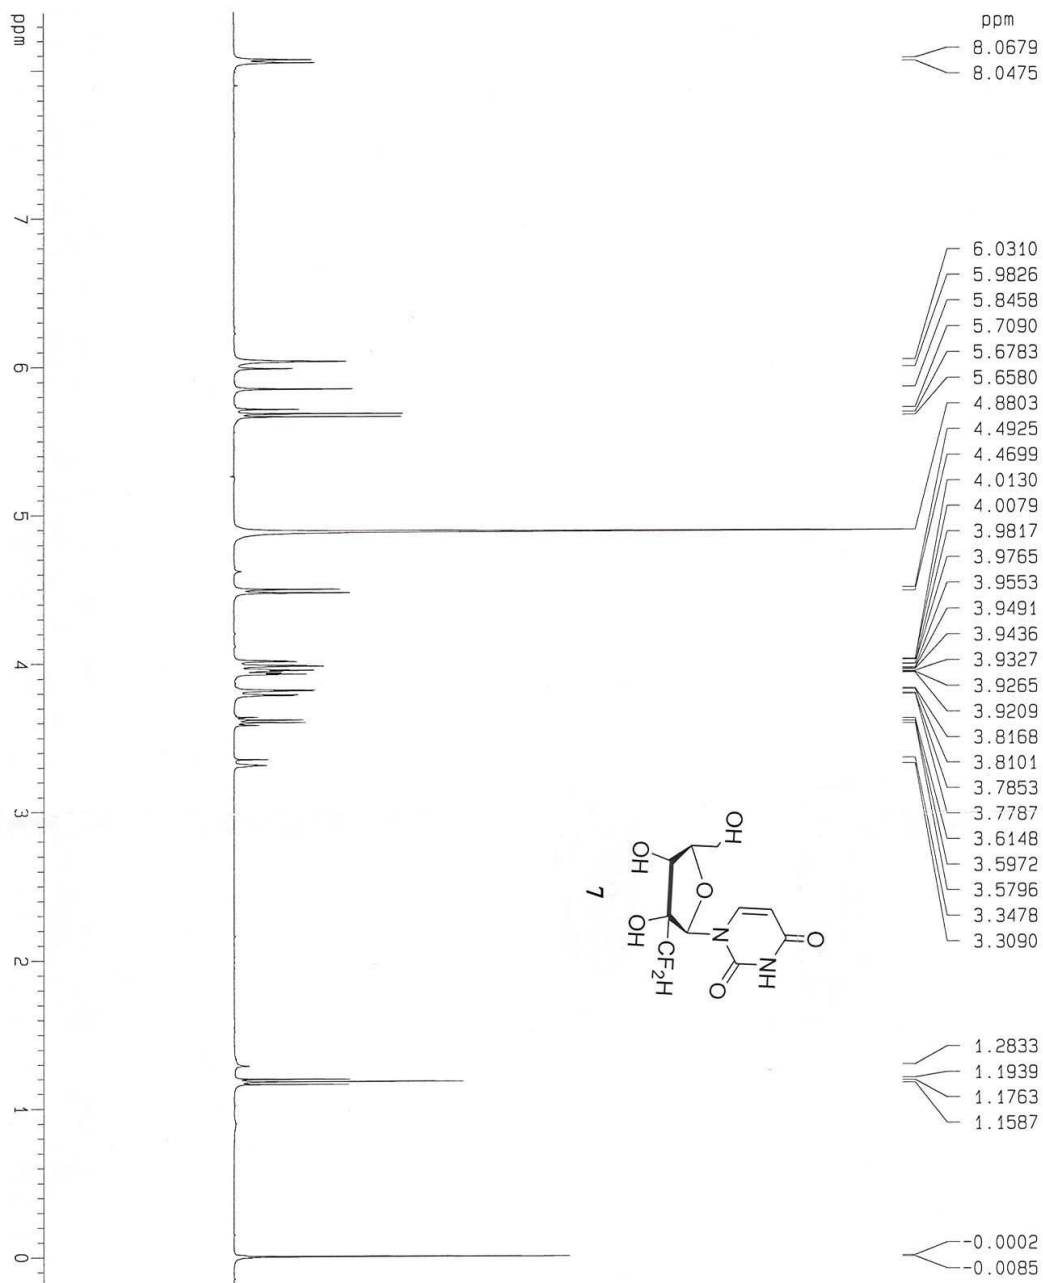

Current Data Parameters

| NAME | EXPNO | PROCNO |
|------|-------|--------|
| B93  | 1     | 1      |

F2 - Acquisition Parameters

| Date_    | Time  | INSTRUM | PROBHD     | PULPROG | TD    | SOLVENT | NS | DS | SMH         | FIDRES      | AQ            | RG  | DW           | DE        | TE      | D1             | P1        | SFO1            | NUC1 | PL1      |
|----------|-------|---------|------------|---------|-------|---------|----|----|-------------|-------------|---------------|-----|--------------|-----------|---------|----------------|-----------|-----------------|------|----------|
| 20021028 | 18.18 | spect   | 5 mm WJ1nu | zg      | 39046 | MeOH    | 8  | 0  | 4807.692 Hz | 0.123129 Hz | 4.0608339 sec | 2.2 | 104.000 usec | 7.00 usec | 300.0 K | 2.00000000 sec | 7.70 usec | 400.1317512 MHz | 1H   | -6.00 dB |

F2 - Processing parameters

| SI    | SF             | WDW | SSB | LB      | GB | PC   |
|-------|----------------|-----|-----|---------|----|------|
| 32768 | 400.130073 MHz | EM  | 0   | 0.30 Hz | 0  | 1.00 |

1D NMR plot parameters

| CX       | F1p       | F2p        | PPMCM          | HZCM            |
|----------|-----------|------------|----------------|-----------------|
| 20.00 cm | 8.390 ppm | 3357.08 Hz | -0.191 ppm     | -76.23 Hz       |
|          |           |            | 0.42902 ppm/cm | 171.66541 Hz/cm |

97/10/17, #5, 122.5 mg

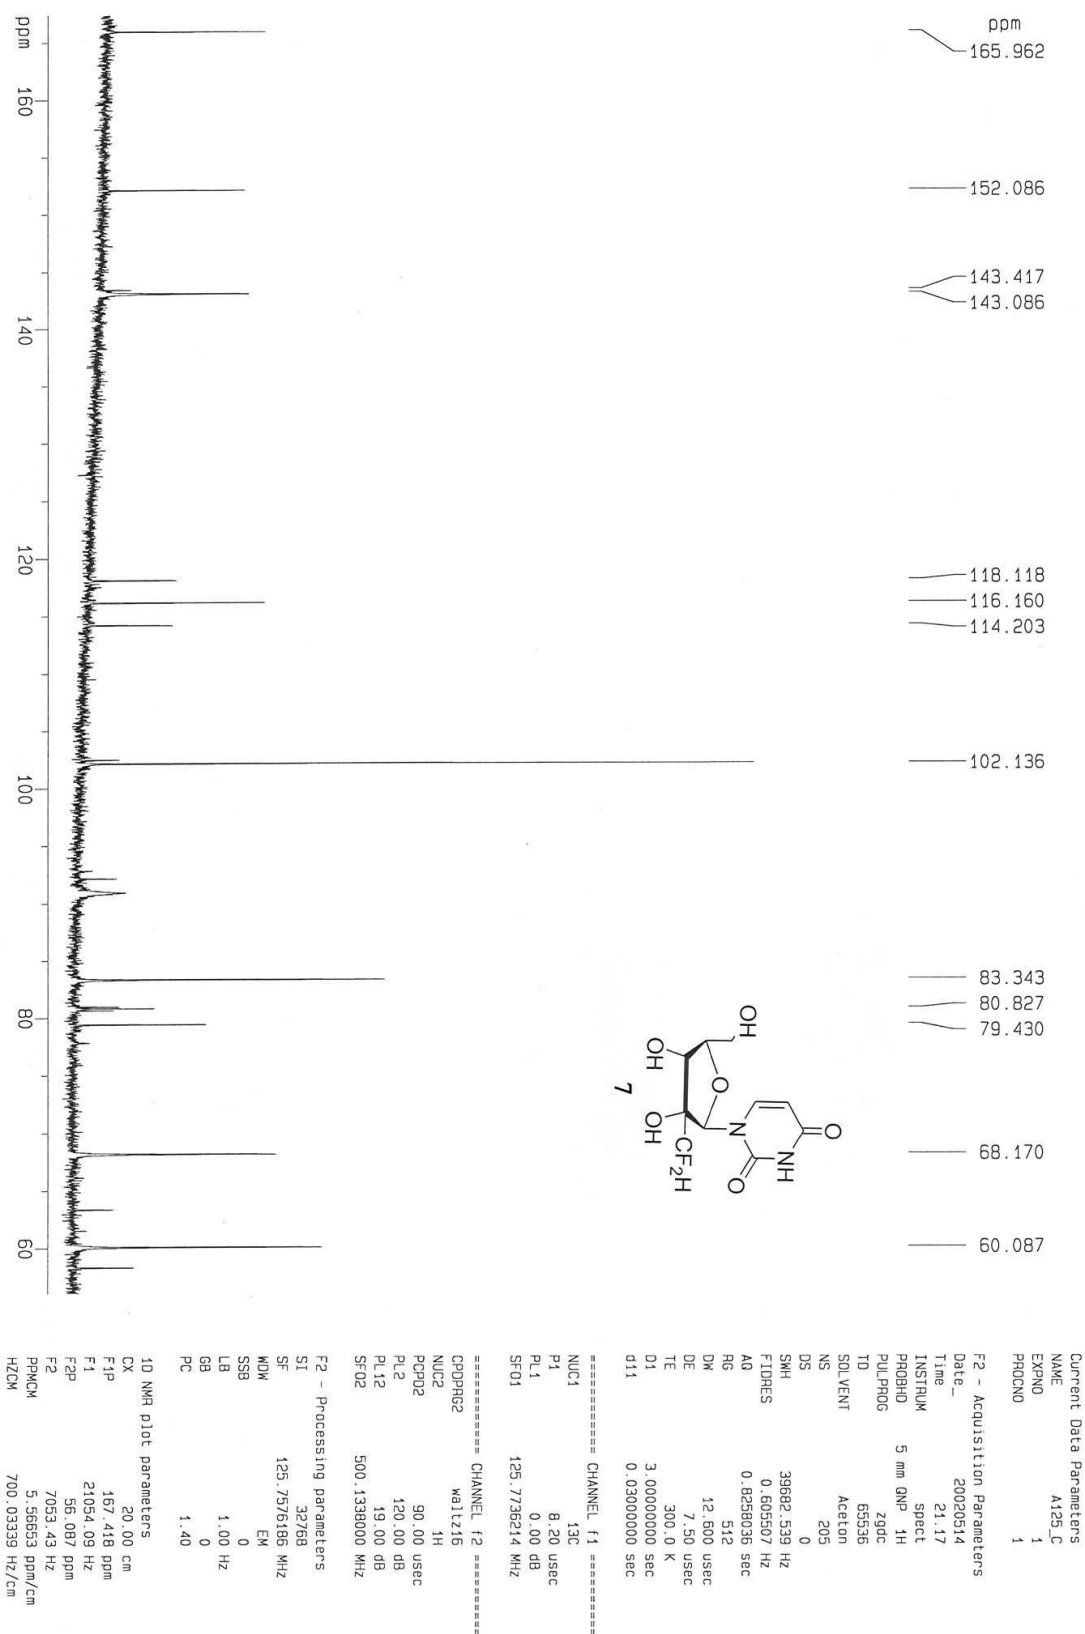

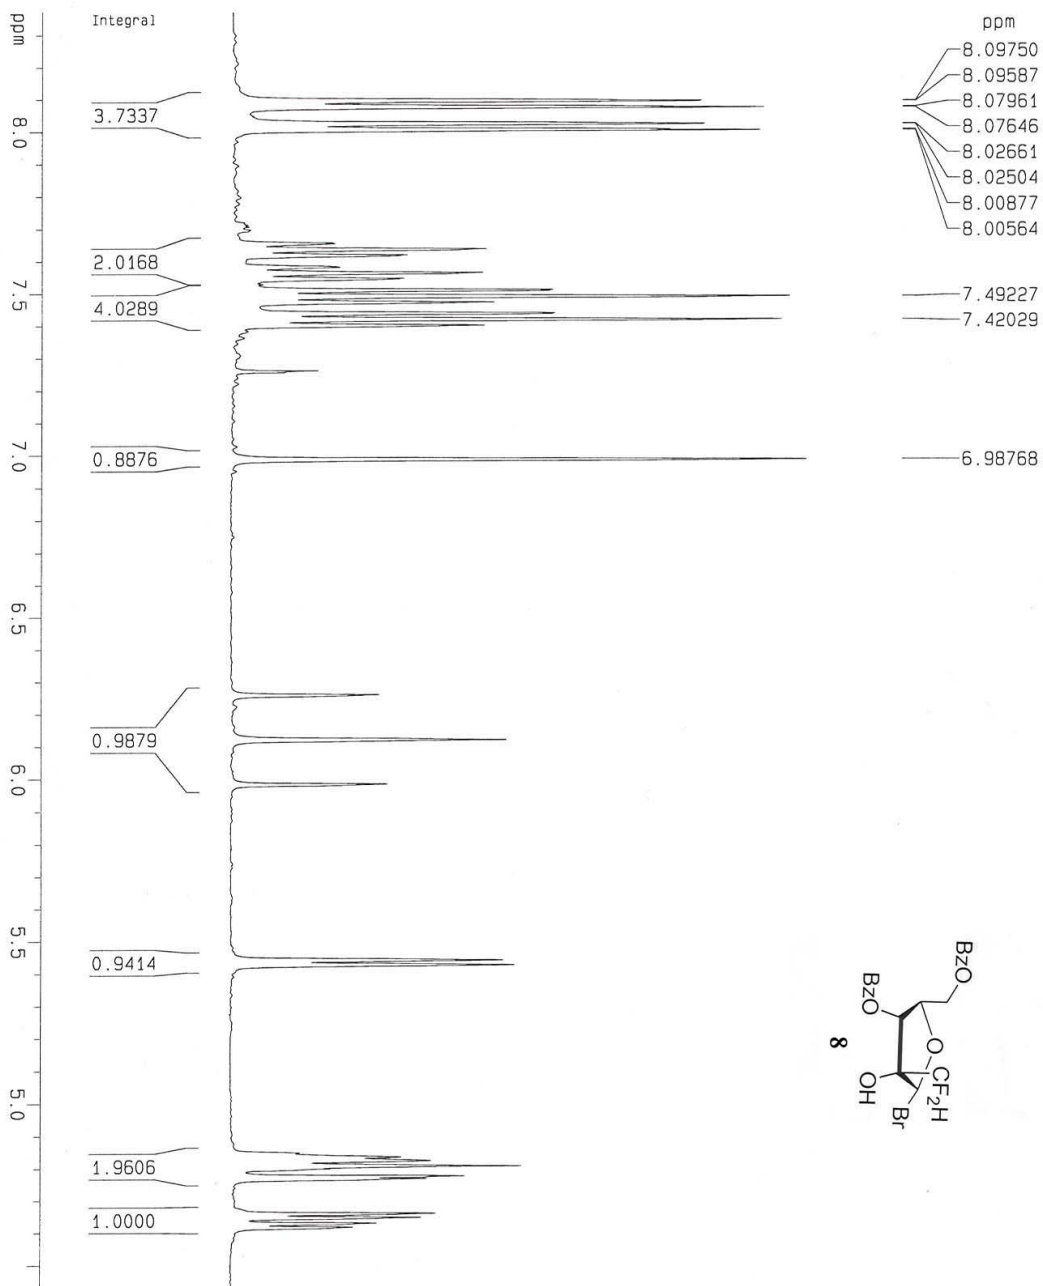

Current Data Parameters

| NAME   | B44_10 |
|--------|--------|
| EXPNO  | 1      |
| PROCNO | 1      |

F2 - Acquisition Parameters

| Date_   | 20020805        |
|---------|-----------------|
| Time    | 14.22           |
| INSTRUM | 5 mm Multinu    |
| PROBHD  | z9              |
| PULPROG | zg              |
| TD      | 39046           |
| SOLVENT | CDCl3           |
| NS      | 8               |
| DS      | 0               |
| SWH     | 4807.692 Hz     |
| FIDRES  | 0.123129 Hz     |
| AQ      | 4.0608339 sec   |
| RG      | 35.9            |
| DM      | 104.000 usec    |
| DE      | 7.00 usec       |
| TE      | 300.0 K         |
| D1      | 2.00000000 sec  |
| P1      | 7.70 usec       |
| SFO1    | 400.1317512 MHz |
| NUC1    | <sup>1</sup> H  |
| PL1     | -6.00 dB        |

F2 - Processing parameters

| SI  | 32768           |
|-----|-----------------|
| SF  | 400.1300089 MHz |
| WDW | EM              |
| SSB | 0               |
| LB  | 0.30 Hz         |
| GB  | 0               |
| PC  | 1.00            |

1D NMR plot parameters

| CX    | 20.00 cm       |
|-------|----------------|
| F1P   | 8.373 ppm      |
| F1    | 3350.16 Hz     |
| F2P   | 4.434 ppm      |
| F2    | 1774.13 Hz     |
| PPMCM | 0.19694 ppm/cm |
| HZCM  | 78.80158 Hz/cm |

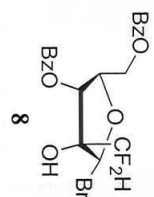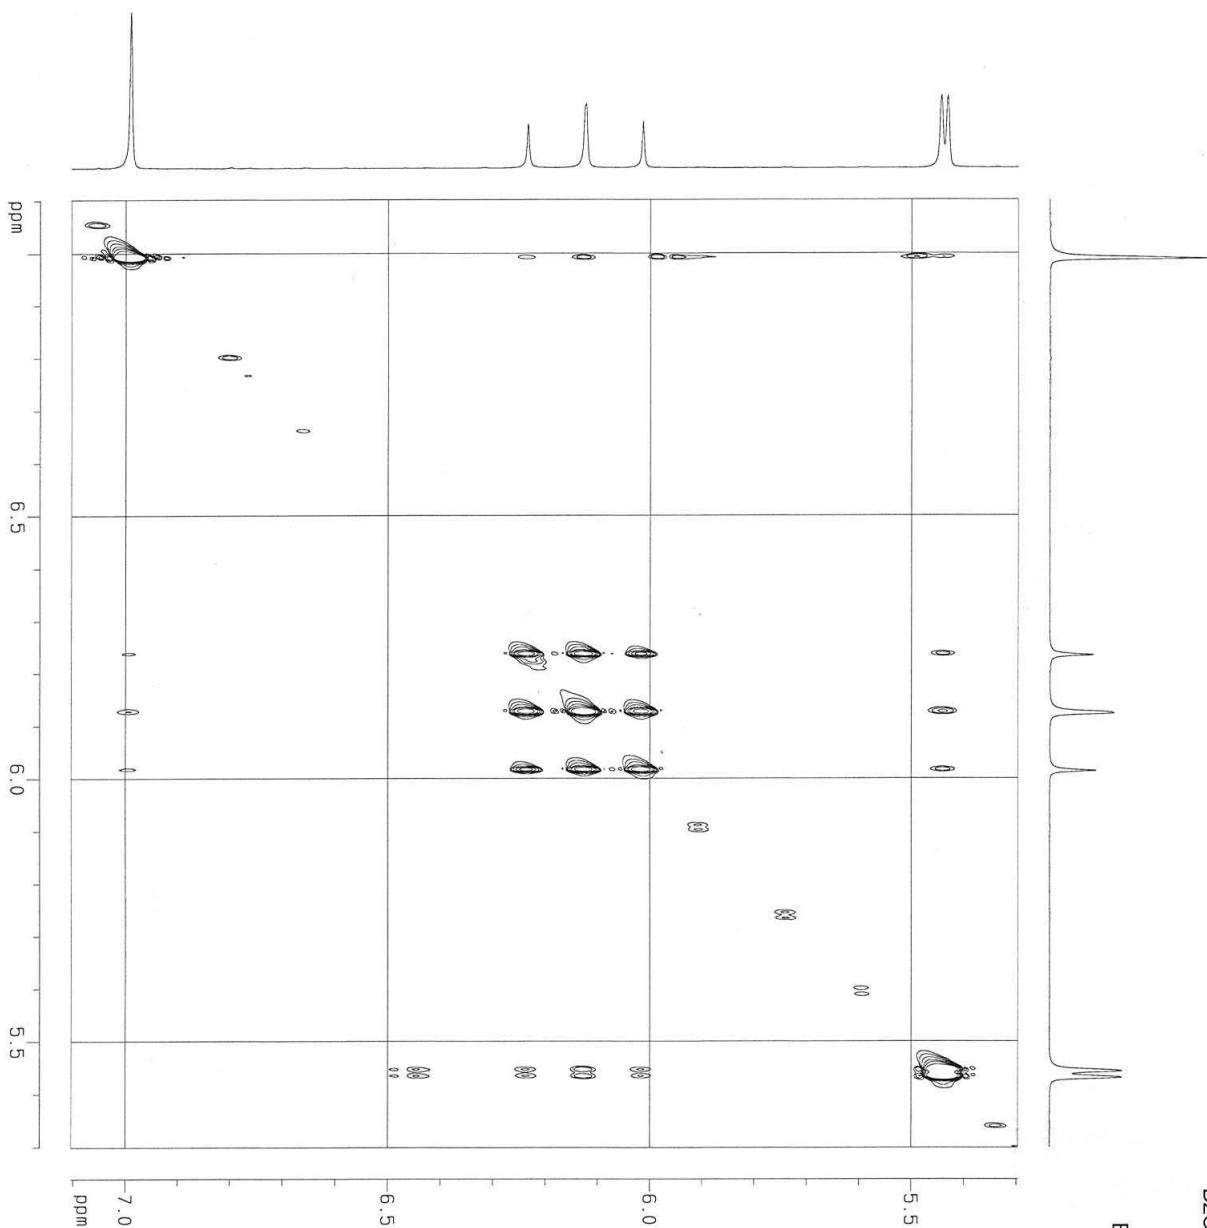

## Current Data Parameters

NAME B4  
EXPNO 3  
PROCNO 1

## F2 - Acquisition Parameters

Date\_ 20060805  
Time 23.26  
INSTRUM spect  
PROBHD 5 mm WJ11nu  
PULPROG zgpg30  
TD 2048  
SOLVENT CDCl3  
NS 32  
DS 16  
SWH 2042.484 Hz  
FIDRES 0.597206 Hz  
AQ 0.5574020 sec  
RG 20  
DM 244.800 usec  
DE 4.50 usec  
TE 300.0 K  
d0 0.00003200 sec  
d1 2.00000000 sec  
DB 0.75000000 sec  
IN 0.00024480 sec

## ===== CHANNEL f1 =====

NUC1 <sup>1</sup>H  
P1 6.00 usec  
PL1 0.00 dB  
SFO1 500.1362173 MHz

## F1 - Acquisition Parameters

NO 2  
TD 256  
SFO1 500.1332 MHz  
FIDRES 7.978452 Hz  
SM 4.094 ppm

## F2 - Processing parameters

SI 2048  
SF 500.1300114 MHz  
WDW DSINE  
SSB 0  
LB 0.00 Hz  
GB 0  
PC 1.00

## F1 - Processing parameters

SI 1024  
MC2 1024  
SF 500.1300114 MHz  
WDW DSINE  
SSB 2  
LB 0.00 Hz  
GB 0

## 2D NMR plot parameters

CP2 12.00 cm  
CXY 4.00 cm  
F2B0 7.102 ppm  
F2B1 3551.90 Hz  
F2B2 5.259 ppm  
F2B3 2650.34 Hz  
F1B0 7.104 ppm  
F1B1 3552.90 Hz  
F1B2 5.297 ppm  
F1B3 2649.34 Hz  
F2PCKM 0.12016 ppm/cm  
F2H2CKM 60.10454 Hz/cm  
F1PCKM 0.12044 ppm/cm  
F1H2CKM 60.23702 Hz/cm

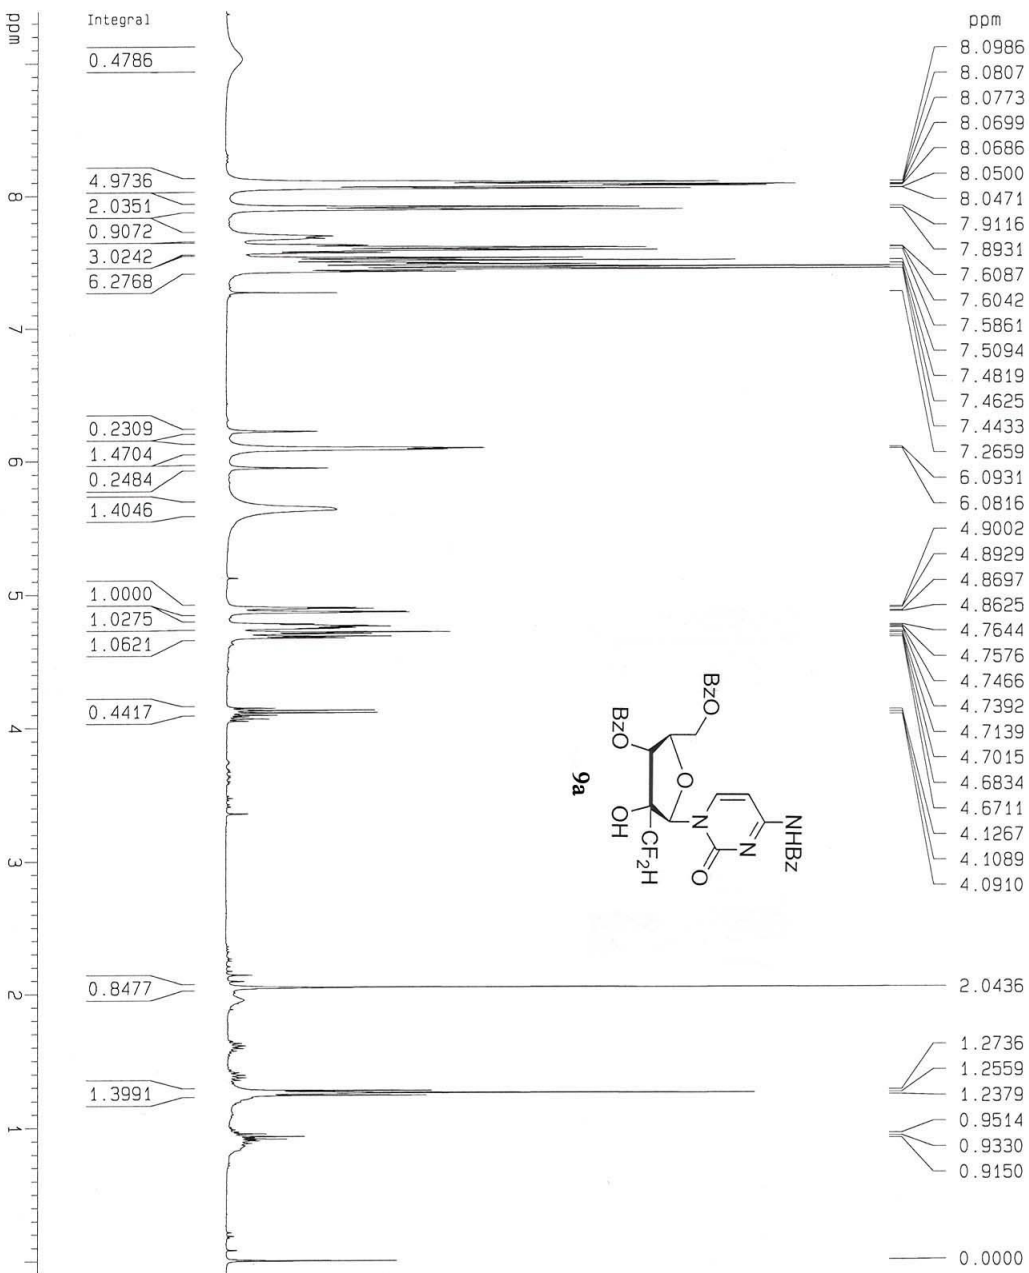

Current Data Parameters

| NAME   | VALUE |
|--------|-------|
| EXPNO  | 1     |
| PROCNO | 1     |

F2 - Acquisition Parameters

| Parameter | Value          |
|-----------|----------------|
| Date_     | 20030224       |
| Time      | 14.30          |
| INSTRUM   | spect          |
| PROBHD    | 5 mm QNP 1H    |
| PULPROG   | zg             |
| TD        | 32768          |
| SOLVENT   | CDCl3          |
| NS        | 8              |
| DS        | 0              |
| SWH       | 4807.692 Hz    |
| FIDRES    | 0.146719 Hz    |
| AQ        | 3.4079220 sec  |
| RG        | 32             |
| DM        | 104.000 usec   |
| DE        | 4.50 usec      |
| TE        | 300.0 K        |
| D1        | 2.00000000 sec |

===== CHANNEL f1 =====

| Parameter | Value           |
|-----------|-----------------|
| NUC1      | <sup>1</sup> H  |
| P1        | 10.50 usec      |
| PL1       | 0.00 dB         |
| SFO1      | 400.1319246 MHz |

F2 - Processing parameters

| Parameter | Value           |
|-----------|-----------------|
| SI        | 16384           |
| SF        | 400.1300072 MHz |
| WDW       | EM              |
| SSB       | 0               |
| LB        | 0.30 Hz         |
| GB        | 0               |
| PC        | 1.00            |

1D NMR plot parameters

| Parameter | Value           |
|-----------|-----------------|
| CX        | 20.00 cm        |
| F1P       | 9.399 ppm       |
| F1        | 3756.79 Hz      |
| F2P       | -0.093 ppm      |
| F2        | -37.11 Hz       |
| PPMCM     | 0.47405 ppm/cm  |
| HZCM      | 189.69481 Hz/cm |

97/10/17, #5, 122.5 mg

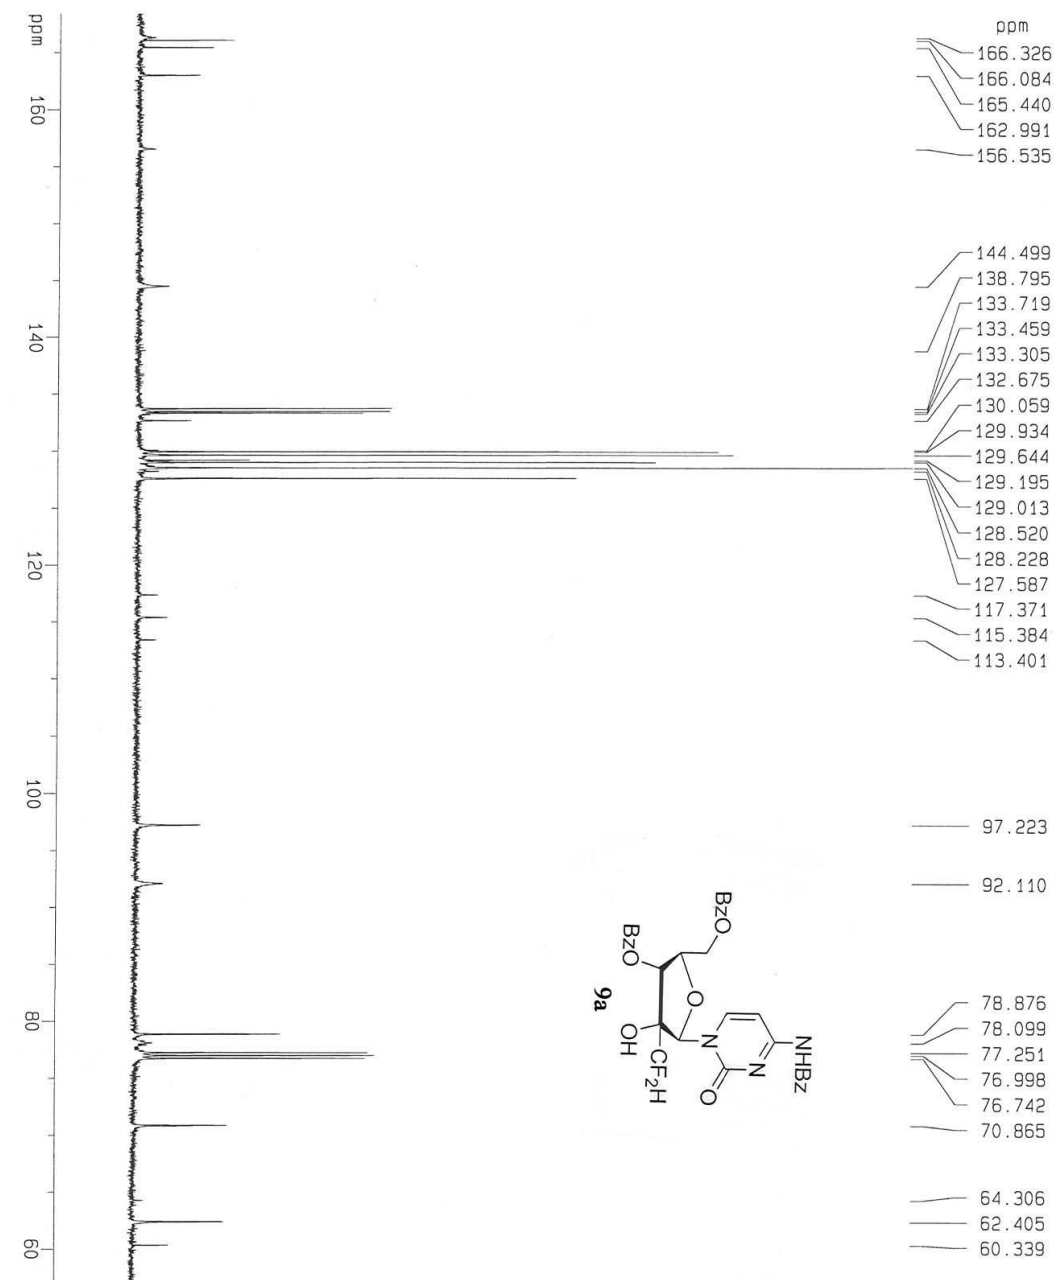

Current Data Parameters

| NAME | EXPNO | PROCNO | PROGNO |
|------|-------|--------|--------|
| NAME | 1     | 1      | 1      |

F2 - Acquisition Parameters

| Date_    | Time  | INSTRUM | PROBHD      | PULPROG | TD    | SOLVENT | NS  | DS | SWH          | FIDRES      | AQ            | RG  | DM          | DE        | TE      | D1             | d11            |
|----------|-------|---------|-------------|---------|-------|---------|-----|----|--------------|-------------|---------------|-----|-------------|-----------|---------|----------------|----------------|
| 20030314 | 18.20 | spect   | 5 mm QNP 1H | zgpg    | 65536 | CDCl3   | 468 | 0  | 39682.539 Hz | 0.605507 Hz | 0.8258036 sec | 512 | 12.600 usec | 7.50 usec | 300.0 K | 3.00000000 sec | 0.03000000 sec |

===== CHANNEL f1 =====

| NUC1 | P1        | PL1     | SFO1            |
|------|-----------|---------|-----------------|
| 13C  | 8.20 usec | 0.00 dB | 125.7736214 MHz |

===== CHANNEL f2 =====

| CPDPRG2 | NUC2 | PCPD2      | PL2       | SFO2            |
|---------|------|------------|-----------|-----------------|
| waltz16 | 1H   | 90.00 usec | 120.00 dB | 500.1338000 MHz |

F2 - Processing parameters

| SI    | SF              | WDW | SSB | LB      | GB | PC   |
|-------|-----------------|-----|-----|---------|----|------|
| 32768 | 125.7577982 MHz | EM  | 0   | 1.00 Hz | 0  | 1.40 |

1D NMR plot parameters

| CK       | F1P         | F1          | F2P        | F2         | PRCKM          | HZCM            |
|----------|-------------|-------------|------------|------------|----------------|-----------------|
| 20.00 cm | 168.443 ppm | 21183.00 Hz | 57.086 ppm | 7178.98 Hz | 5.56785 ppm/cm | 700.20074 Hz/cm |

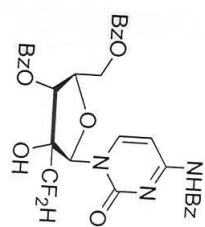

9a

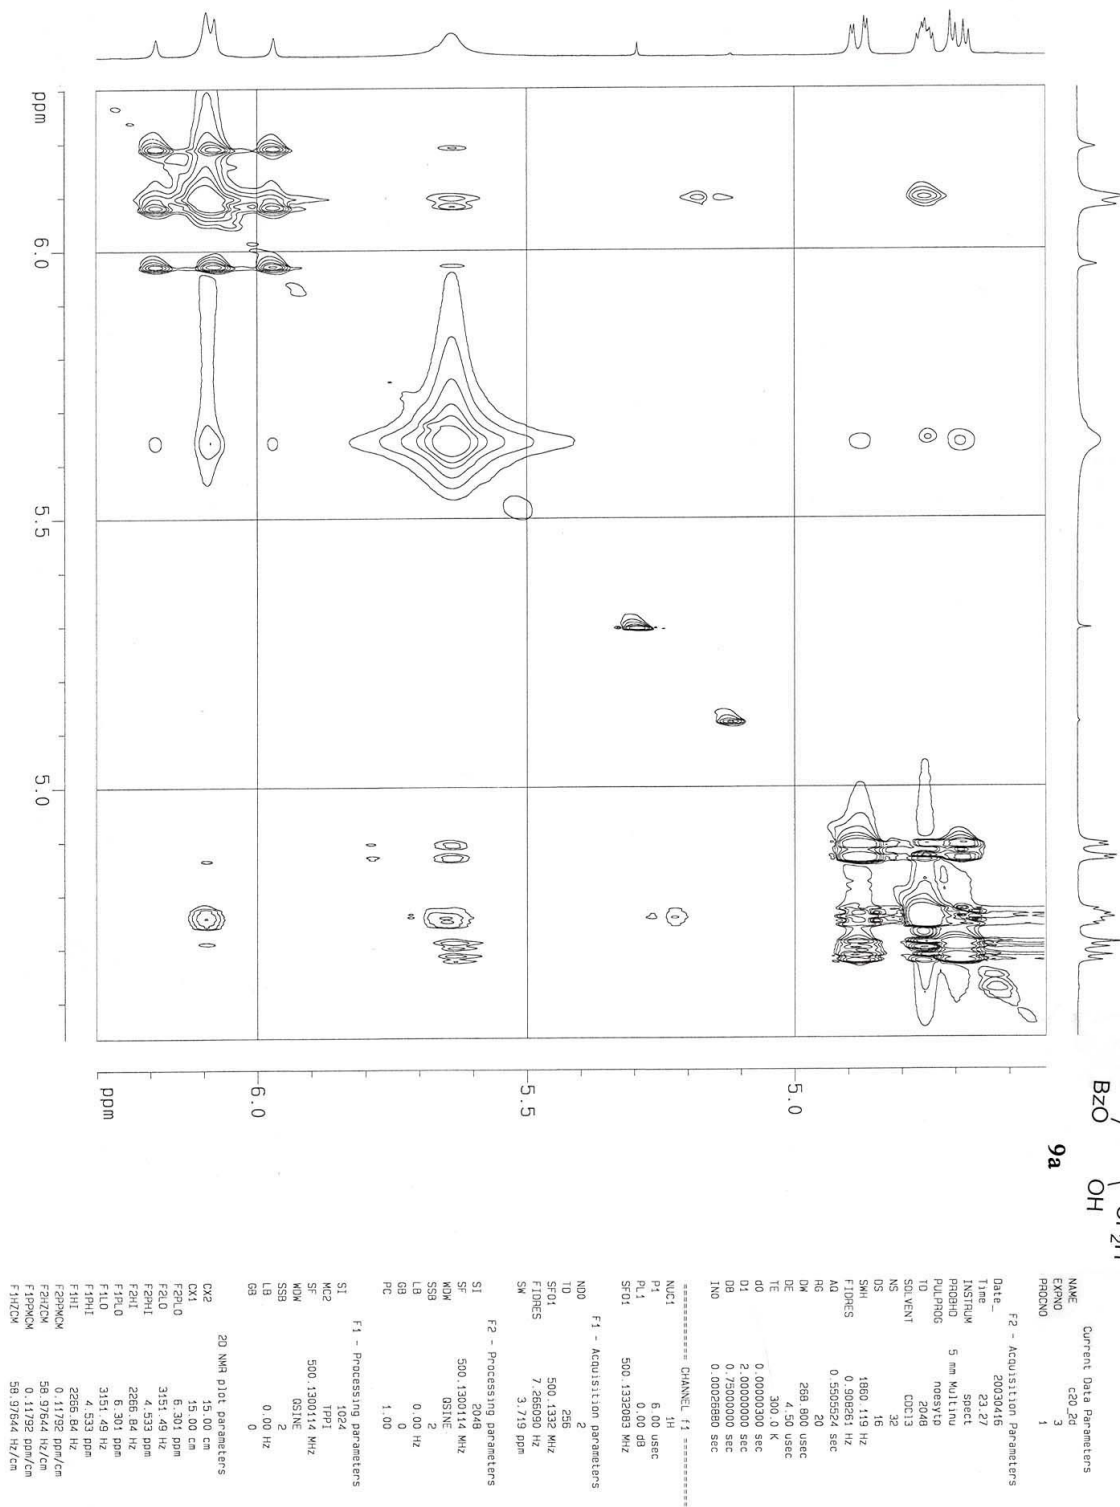

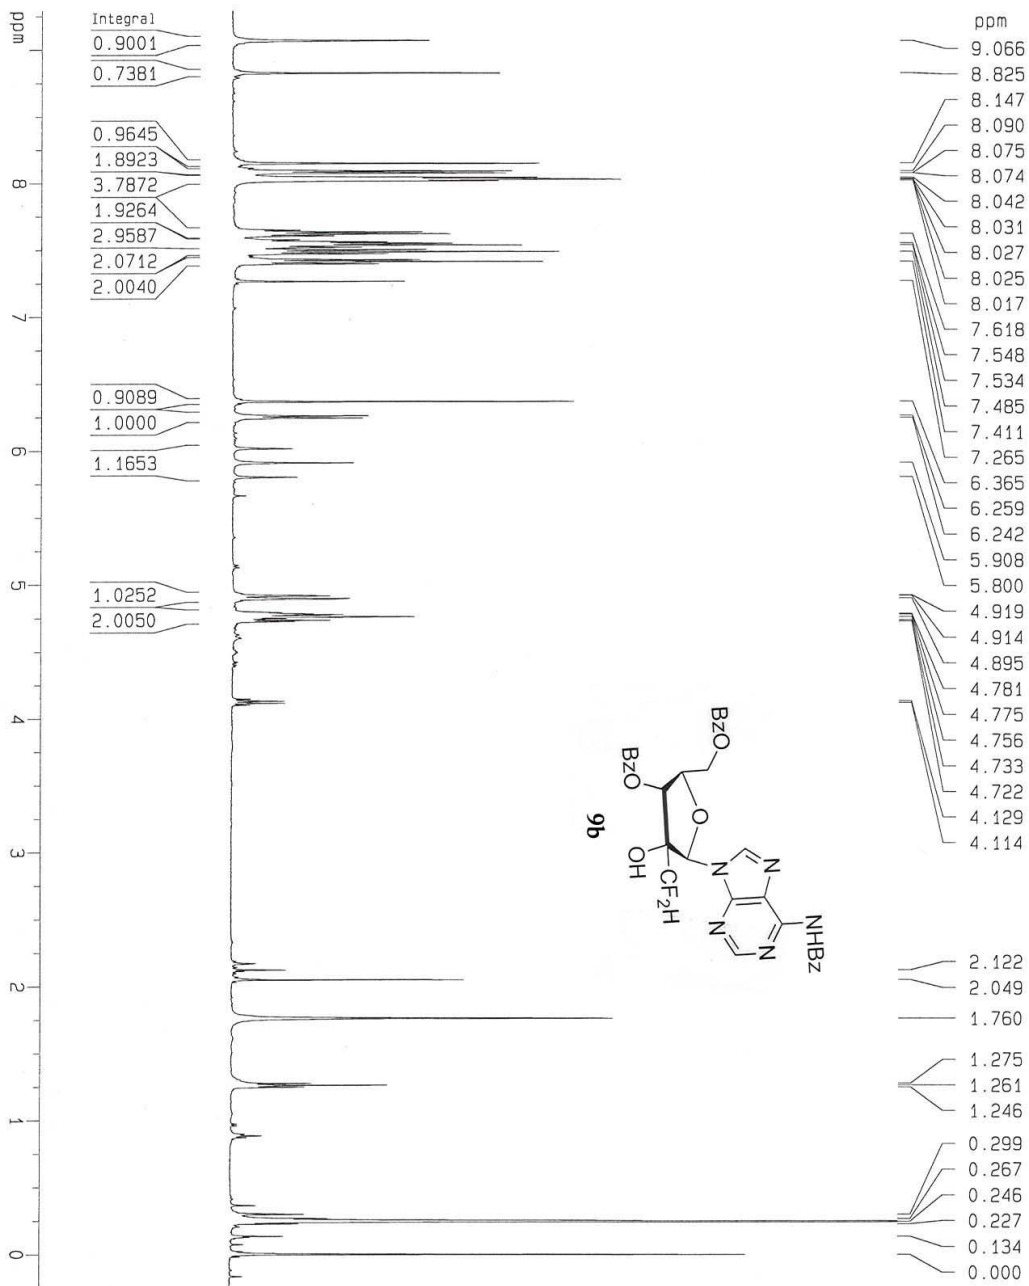

Current Data Parameters  
NAME D23a7  
EXPNO 1  
PROCNO 1

F2 - Acquisition Parameters  
Date\_ 20030915  
Time 21.25  
INSTRUM spect  
PROBHD 5 mm QNP 1H  
PULPROG zg  
TD 32768  
SOLVENT CDCl3  
NS 8  
DS 0  
SMH 600.615 Hz  
FIDRES 0.183399 Hz  
AQ 2.7263477 sec  
RG 128  
DM 83.200 usec  
DE 4.50 usec  
TE 300.0 K  
D1 2.00000000 sec

===== CHANNEL f1 =====  
NUC1 1H  
P1 10.00 usec  
PL1 0.00 dB  
SF01 500.130118 MHz

F2 - Processing parameters  
SI 16384  
SF 500.1300113 MHz  
WDW EM  
SSB 0  
LB 0.30 Hz  
GB 0  
PC 1.00

1D NMR plot parameters  
CX 20.00 cm  
F1P 9.292 DPM  
F1 4647.13 Hz  
F2P -0.231 DPM  
F2 -115.45 Hz  
PPMCM 0.47613 DPM/cm  
HZCM 238.12936 Hz/cm

97/10/17, #5, 122.5 mg

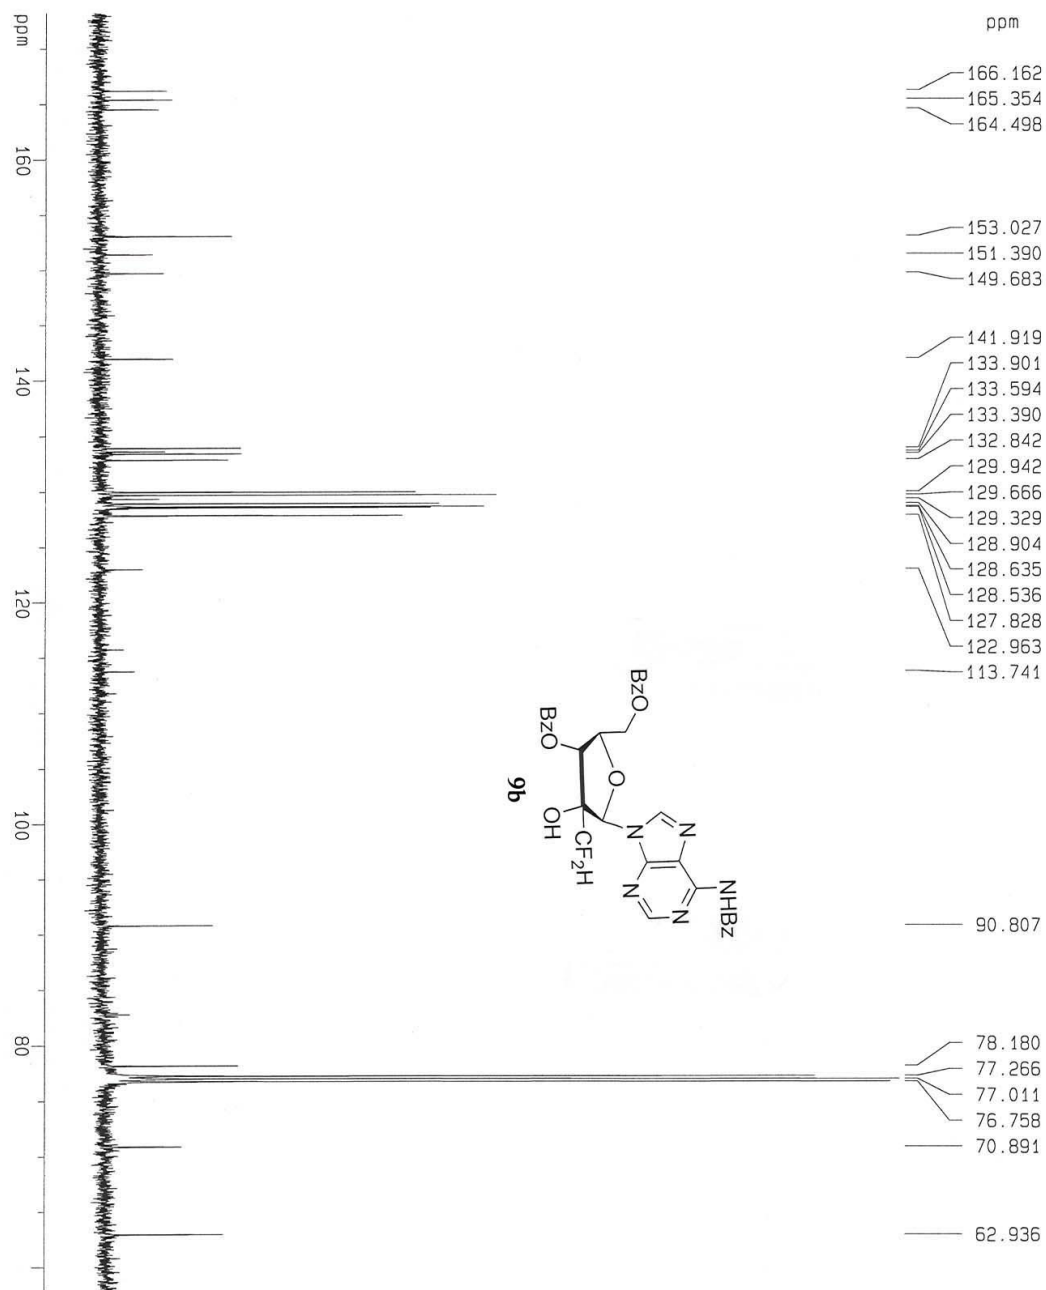

Current Data Parameters

| NAME   | EXPNO | PROCNO |
|--------|-------|--------|
| D23a7c | 1     | 1      |

F2 - Acquisition Parameters

| Date_    | Time  | INSTRUM | PROBHD      | PULPROG | TD    | SOLVENT | DS  | SMH | FIDRES       | RG          | DM   | DE          | TE        | D1      | d11            |
|----------|-------|---------|-------------|---------|-------|---------|-----|-----|--------------|-------------|------|-------------|-----------|---------|----------------|
| 20030915 | 21.48 | spect   | 5 mm QNP 1H | zgpg    | 65536 | Aceton  | 510 | 0   | 39682.539 Hz | 0.605507 Hz | 2048 | 12.600 usec | 7.50 usec | 300.0 K | 0.03000000 sec |

===== CHANNEL f1 =====

| NUC1 | P1        | PL1     | SFO1            |
|------|-----------|---------|-----------------|
| 13C  | 8.20 usec | 0.00 dB | 125.7736214 MHz |

===== CHANNEL f2 =====

| CPDPRG2 | NUC2 | PCPD2      | PL2       | SFO2            |
|---------|------|------------|-----------|-----------------|
| waltz16 | 1H   | 90.00 usec | 120.00 dB | 500.1338000 MHz |

F2 - Processing parameters

| SF              | SI    | WDW | SSB | LB      | GB | PC   |
|-----------------|-------|-----|-----|---------|----|------|
| 125.7577934 MHz | 32768 | EM  | 0   | 1.00 Hz | 0  | 1.40 |

10 NMR plot parameters

| CK       | FJP         | F1          | F2         | PPMCM      | HZCM            |
|----------|-------------|-------------|------------|------------|-----------------|
| 20.00 cm | 173.228 ppm | 21784.80 Hz | 57.946 ppm | 7287.10 Hz | 5.76414 ppm/cm  |
|          |             |             |            |            | 724.88531 Hz/cm |

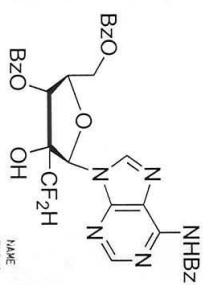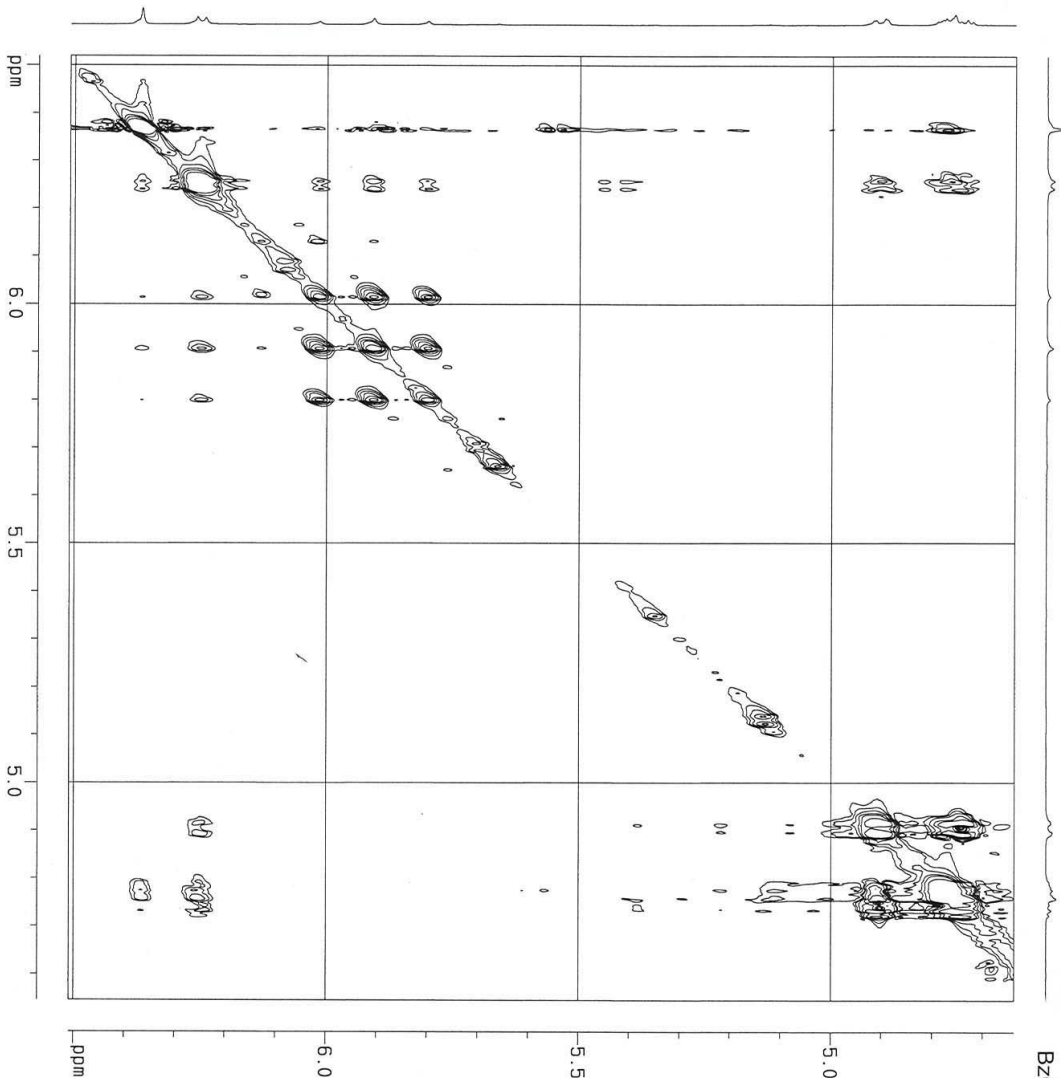

Current Data Parameters

|        |        |
|--------|--------|
| NAME   | 023.2d |
| EXPNO  | 3      |
| PROCNO | 1      |

F2 - Acquisition Parameters

|         |                |
|---------|----------------|
| Date_   | 20030918       |
| Time    | 17:13:33       |
| INSTRUM | spect          |
| PROBHD  | 5 mm WALTou    |
| PULPROG | noesy1d        |
| TD      | 2048           |
| SOLVENT | CDCl3          |
| NS      | 40             |
| DS      | 16             |
| SMH     | 1627.504 Hz    |
| FIDRES  | 0.794729 Hz    |
| AQ      | 0.0291956 sec  |
| RG      | 20             |
| DM      | 307.200 usec   |
| DE      | 4.50 usec      |
| TE      | 300.2 K        |
| d0      | 0.0000300 sec  |
| D1      | 2.00000000 sec |
| D8      | 0.75000000 sec |
| INO     | 0.00030720 sec |

\*\*\*\*\* CHANNEL f1 \*\*\*\*\*

|      |                 |
|------|-----------------|
| NUC1 | <sup>1</sup> H  |
| P1   | 6.00 usec       |
| PL1  | 0.00 dB         |
| SFO1 | 500.1350971 MHz |

F1 - Acquisition Parameters

|        |                 |
|--------|-----------------|
| NUC2   | <sup>13</sup> C |
| TO     | 255             |
| SFO2   | 500.1331 MHz    |
| FIDRES | 6.357629 Hz     |
| SM     | 3.254 ppm       |

F2 - Processing parameters

|     |                 |
|-----|-----------------|
| SI  | 2048            |
| SF  | 500.1300114 MHz |
| WDW | OSINE           |
| SSB | 2               |
| LB  | 0.00 Hz         |
| GB  | 0               |
| PC  | 1.00            |

F1 - Processing parameters

|     |                 |
|-----|-----------------|
| SI  | 1024            |
| MC2 | TPP1            |
| SF  | 500.1300114 MHz |
| WDW | OSINE           |
| SSB | 2               |
| LB  | 0.00 Hz         |
| GB  | 0               |

2D NMR plot parameters

|         |                |
|---------|----------------|
| CX2     | 15.00 cm       |
| CX1     | 15.00 cm       |
| F2PUL   | 6.519 ppm      |
| F2A0    | 3260.50 Hz     |
| F2PHI   | 2273.45 Hz     |
| F2PL0   | 6.510 ppm      |
| F2LO    | 3265.73 Hz     |
| F2PHI   | 4.638 ppm      |
| F2PHI   | 2319.54 Hz     |
| F2PPHCK | 0.13157 ppm/cm |
| F2HZCK  | 65.80353 Hz/cm |
| F1PPHCK | 0.12479 ppm/cm |
| F1HZCK  | 62.41269 Hz/cm |

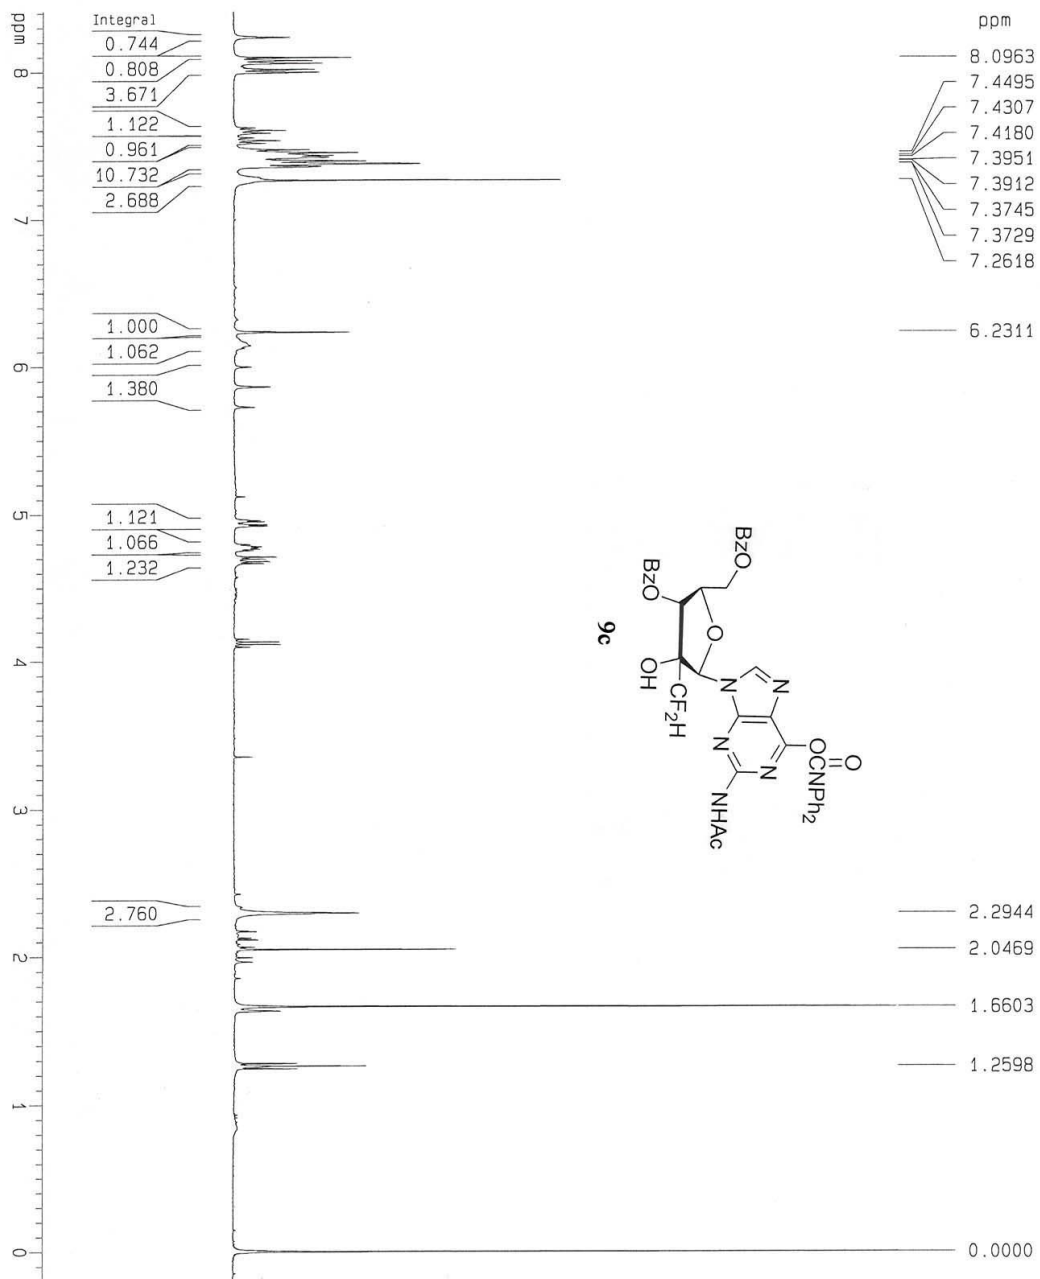

Current Data Parameters  
NAME cs9\_4  
EXPNO 1  
PROCNO 1

F2 - Acquisition Parameters  
Date\_ 20030416  
Time 19.29  
INSTRUM spect  
PROBHD 5 mm QNP 1H  
PULPROG zg  
TD 16384  
SOLVENT CDCl3  
NS 8  
DS 0  
SWH 4807.692 Hz  
FIDRES 0.293438 Hz  
AQ 1.703960 sec  
RG 25.4  
DW 104.000 usec  
DE 6.00 usec  
TE 300.0 K  
D1 2.00000000 sec

===== CHANNEL f1 =====  
NUC1 1H  
P1 10.50 usec  
PL1 0.00 dB  
SFO1 400.132007 MHz

F2 - Processing parameters  
SI 32768  
SF 400.130008 MHz  
WDW EM  
SSB 0  
LB 0.30 Hz  
GB 0  
PC 1.00

1D NMR plot parameters  
CX 20.00 cm  
F1P 8.413 ppm  
F1 3366.24 Hz  
F2P -0.194 ppm  
F2 -77.68 Hz  
PPMCM 0.43035 ppm/cm  
HZCM 172.19603 Hz/cm

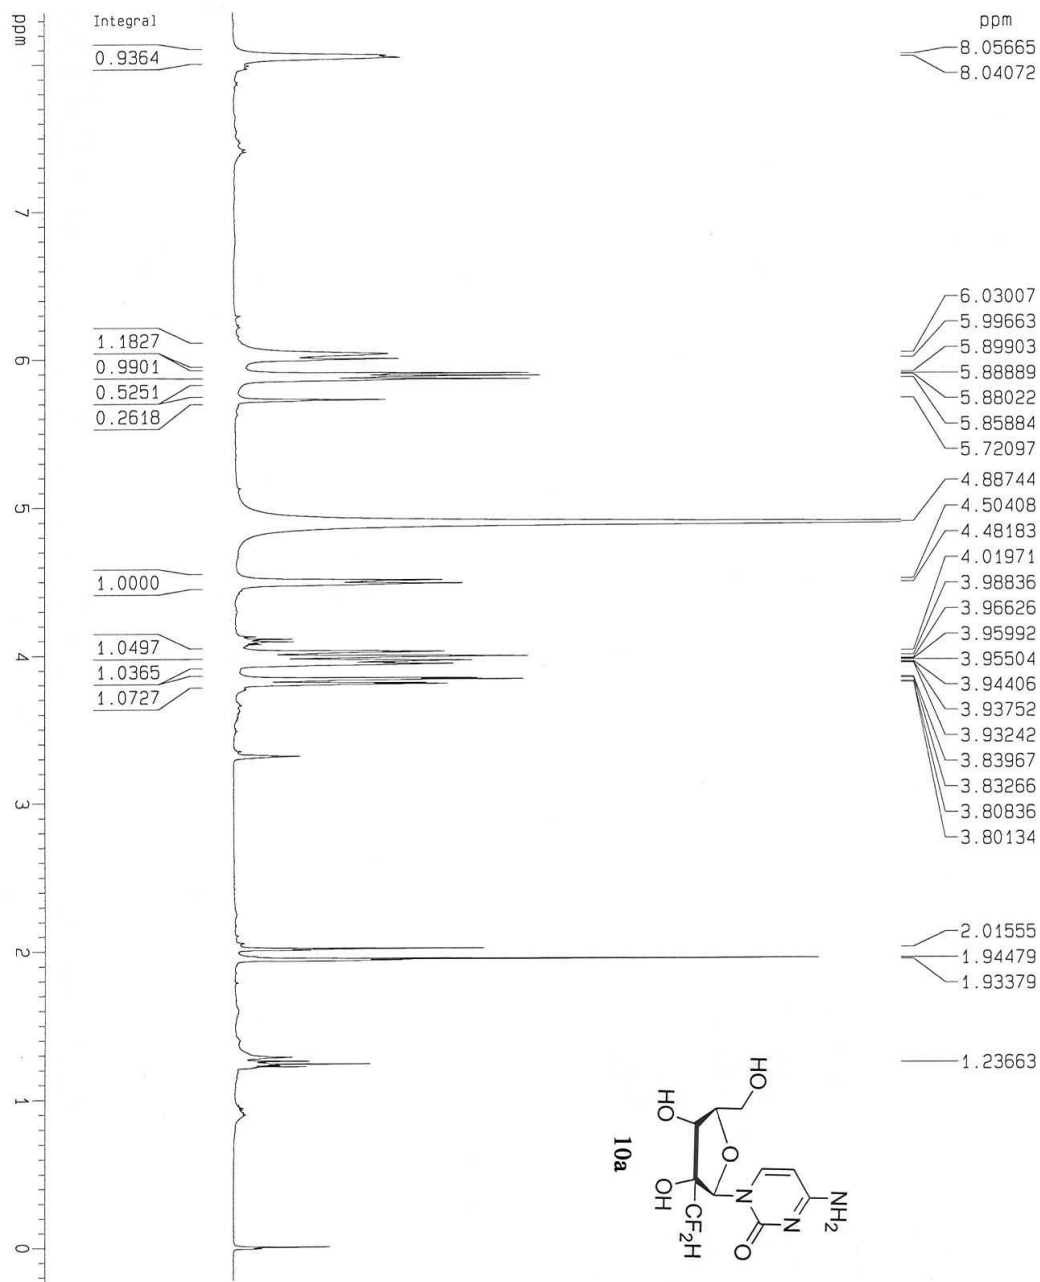

Current Data Parameters

|        |     |
|--------|-----|
| NAME   | C30 |
| EXPNO  | 1   |
| PROCNO | 1   |

F2 - Acquisition Parameters

|         |                |
|---------|----------------|
| Date_   | 20030314       |
| Time    | 18.01          |
| INSTRUM | spect          |
| PROBHD  | 5 mm QNP 1H    |
| PULPROG | Z9             |
| TD      | 16384          |
| SOLVENT | MeOH           |
| NS      | 8              |
| DS      | 0              |
| SMH     | 4807.692 Hz    |
| FIDRES  | 0.293438 Hz    |
| AQ      | 1.7039860 sec  |
| RG      | 25.4           |
| DM      | 104.000 usec   |
| DE      | 6.00 usec      |
| TE      | 300.0 K        |
| D1      | 2.00000000 sec |

===== CHANNEL f1 =====

|      |                |
|------|----------------|
| NUC1 | 1H             |
| P1   | 10.50 usec     |
| PL1  | 0.00 dB        |
| SFO1 | 400.132007 MHz |

F2 - Processing parameters

|     |                |
|-----|----------------|
| SI  | 32768          |
| SF  | 400.130063 MHz |
| WDW | EM             |
| SSB | 0              |
| LB  | 0.30 Hz        |
| GB  | 0              |
| PC  | 1.00           |

1D NMR plot parameters

|       |                 |
|-------|-----------------|
| CK    | 20.00 cm        |
| F1P   | 8.354 ppm       |
| F1    | 3342.60 Hz      |
| F2P   | -0.227 ppm      |
| F2    | -90.72 Hz       |
| PPMCM | 0.42903 ppm/cm  |
| HZCM  | 171.66595 Hz/cm |

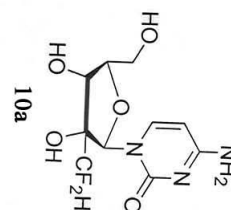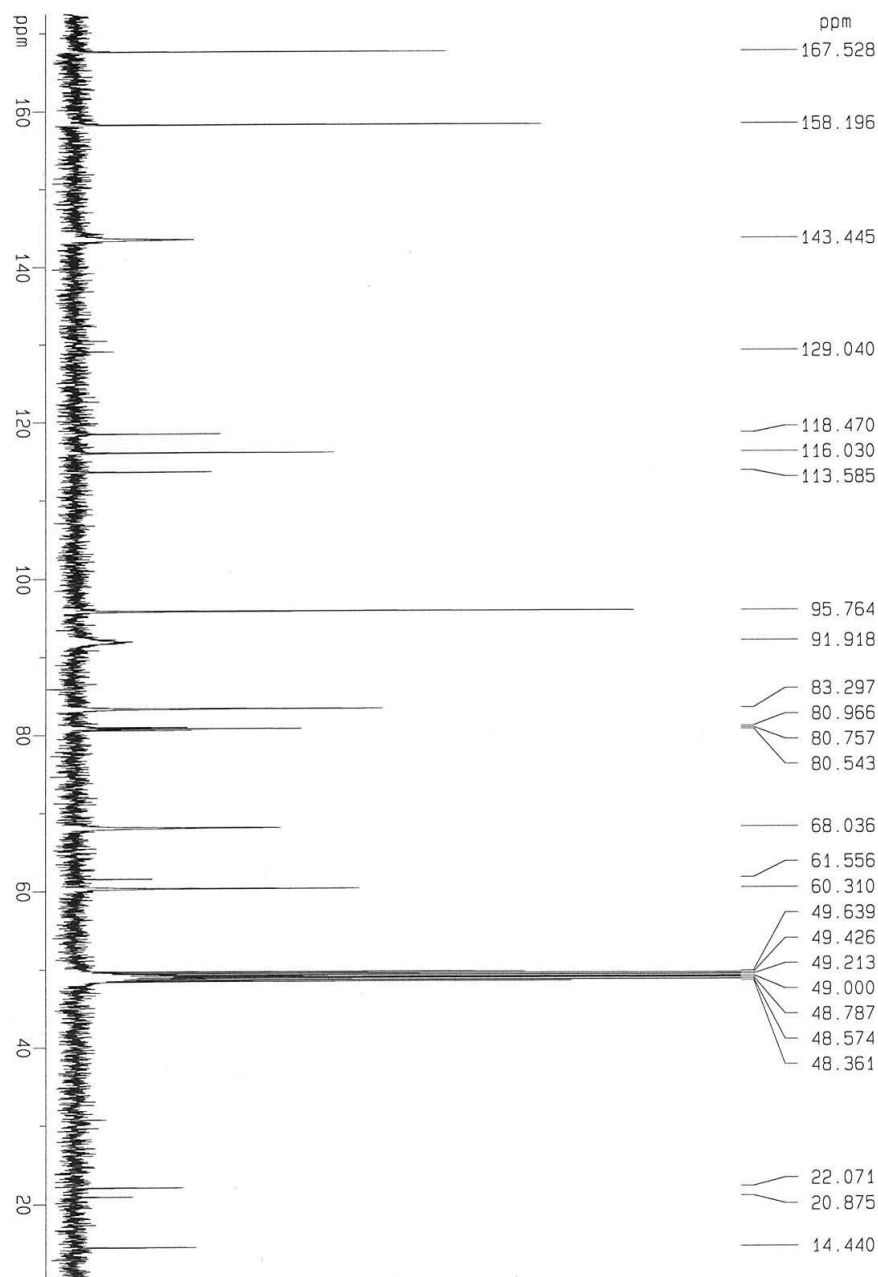

Current Data Parameters

| NAME   | EXPNO | PROCNO |
|--------|-------|--------|
| NAME   | 1     | 1      |
| EXPNO  | 1     | 1      |
| PROCNO | 1     | 1      |

F2 - Acquisition Parameters

| Date_    | Time  | INSTRUM | PROBHD      | PULPROG | TD     | SOLVENT | NS  | DS | SM           | FTRES       | RG            | DE     | TE          | D1        | d11            |                |
|----------|-------|---------|-------------|---------|--------|---------|-----|----|--------------|-------------|---------------|--------|-------------|-----------|----------------|----------------|
| 20030314 | 18.10 | spect   | 5 mm QNP 1H | zgpg    | 162598 | CDCl3   | 242 | 0  | 25052.656 Hz | 0.154139 Hz | 3.2438800 sec | 3649.1 | 19.950 usec | 7.50 usec | 300.0 K        | 4.00000000 sec |
|          |       |         |             |         |        |         |     |    |              |             |               |        |             |           | 0.03000000 sec |                |

===== CHANNEL f1 =====

| NUC1 | P1         | PL1      | SFO1            |
|------|------------|----------|-----------------|
| 13C  | 11.00 usec | -2.00 dB | 100.6227903 MHz |

===== CHANNEL f2 =====

| CPDPRG2 | NUC2 | PCPD2       | PL2       | SFO2            |
|---------|------|-------------|-----------|-----------------|
| waltz16 | 1H   | 101.00 usec | 120.00 dB | 400.1324710 MHz |

F2 - Processing parameters

| SI    | SF              | WDW | SSB | LB      | GB | PC   |
|-------|-----------------|-----|-----|---------|----|------|
| 16384 | 100.6126333 MHz | EM  | 0   | 1.00 Hz | 0  | 1.00 |

10 NMR plot parameters

| CK       | F1P         | F1          | F2P        | F2         | PPCKM          | HZCK            |
|----------|-------------|-------------|------------|------------|----------------|-----------------|
| 20.00 cm | 172.433 ppm | 17348.90 Hz | 10.517 ppm | 1059.18 Hz | 8.09577 ppm/cm | 814.53619 Hz/cm |

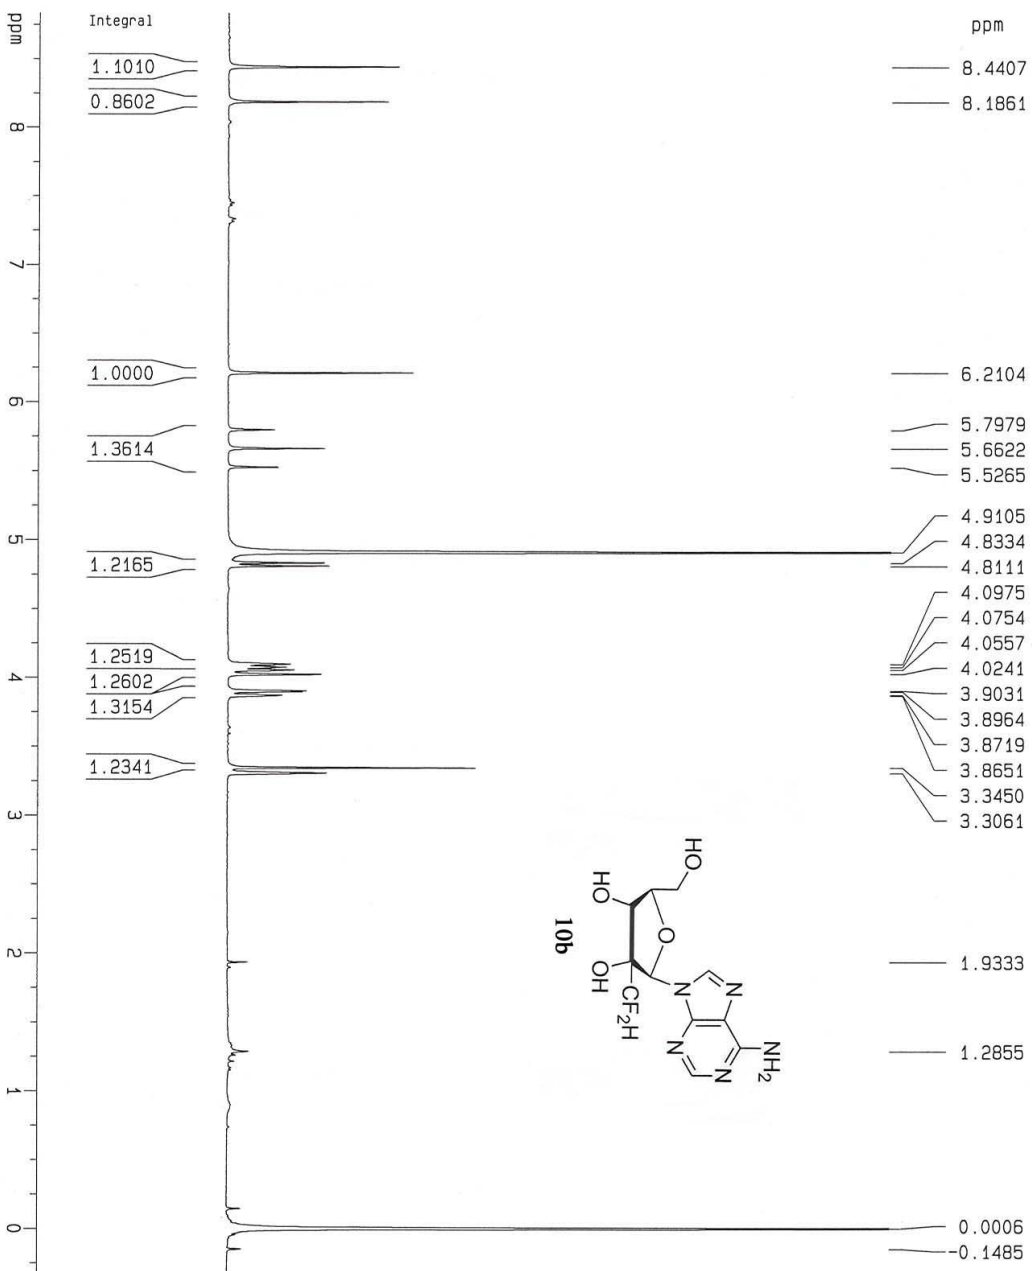

Current Data Parameters

|        |     |
|--------|-----|
| NAME   | D31 |
| EXPNO  | 1   |
| PROCNO | 1   |

F2 - Acquisition Parameters

|         |                |
|---------|----------------|
| Date_   | 20030922       |
| Time    | 17.39          |
| INSTRUM | spect          |
| PROBHD  | 5 mm QNP 1H    |
| PULPROG | zg             |
| TD      | 16384          |
| SOLVENT | MeOH           |
| NS      | 8              |
| DS      | 0              |
| SWH     | 5580.357 Hz    |
| FIDRES  | 0.340598 Hz    |
| AQ      | 1.4680564 sec  |
| RG      | 161.3          |
| DW      | 89.600 usec    |
| DE      | 6.00 usec      |
| TE      | 300.0 K        |
| D1      | 2.00000000 sec |

===== CHANNEL f1 =====

|      |                 |
|------|-----------------|
| NUC1 | 1H              |
| P1   | 10.50 usec      |
| PL1  | 0.00 dB         |
| SFO1 | 400.1318006 MHz |

F2 - Processing parameters

|     |                 |
|-----|-----------------|
| SI  | 32768           |
| SF  | 400.1300089 MHz |
| MDM | EM              |
| SSB | 0               |
| LB  | 0.30 Hz         |
| GB  | 0               |
| PC  | 1.00            |

1D NMR plot parameters

|       |                 |
|-------|-----------------|
| CX    | 20.00 cm        |
| F1P   | 8.834 ppm       |
| F1    | 3534.81 Hz      |
| F2P   | -0.326 ppm      |
| F2    | -130.00 Hz      |
| PPMCM | 0.45795 ppm/cm  |
| HZCM  | 183.24020 Hz/cm |

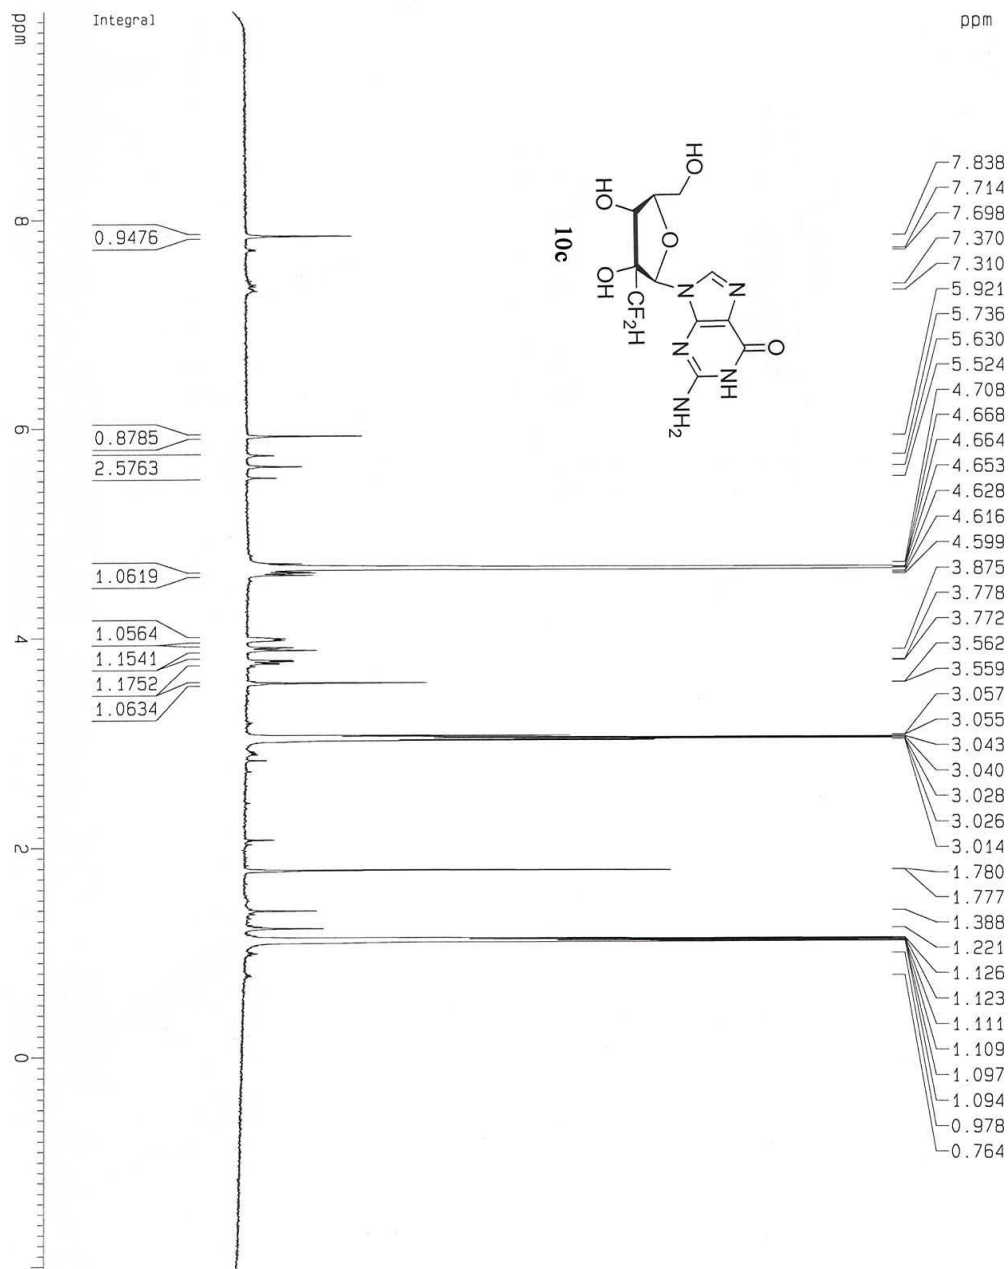

Current Data Parameters

|        |        |
|--------|--------|
| NAME   | B140_2 |
| EXPNO  | 1      |
| PROCNO | 1      |

F2 - Acquisition Parameters

|         |                |
|---------|----------------|
| Date_   | 20021216       |
| Time    | 12.22          |
| INSTRUM | spect          |
| PROBHD  | 5 mm QNP 1H    |
| PULPROG | zgpg30         |
| TD      | 32768          |
| SOLVENT | D2O            |
| NS      | 64             |
| DS      | 0              |
| SWH     | 6009.615 Hz    |
| FIDRES  | 0.183399 Hz    |
| AQ      | 2.7563477 sec  |
| RG      | 256            |
| DM      | 83.200 usec    |
| DE      | 4.50 usec      |
| TE      | 300.0 K        |
| D1      | 2.00000000 sec |

===== CHANNEL f1 =====

|      |                 |
|------|-----------------|
| NUC1 | 1H              |
| P1   | 10.00 usec      |
| PL1  | 0.00 dB         |
| SFO1 | 500.1320118 MHz |

F2 - Processing parameters

|     |                 |
|-----|-----------------|
| SI  | 16384           |
| SF  | 500.1300181 MHz |
| WDW | EM              |
| SSB | 0               |
| LB  | 0.30 Hz         |
| GB  | 0               |
| PC  | 1.00            |

1D NMR plot parameters

|       |                 |
|-------|-----------------|
| CX    | 20.00 cm        |
| F1P   | 9.994 ppm       |
| F1    | 4998.53 Hz      |
| F2P   | -2.022 ppm      |
| F2    | -1011.08 Hz     |
| PPMCM | 0.60081 ppm/cm  |
| HZCM  | 300.48077 Hz/cm |

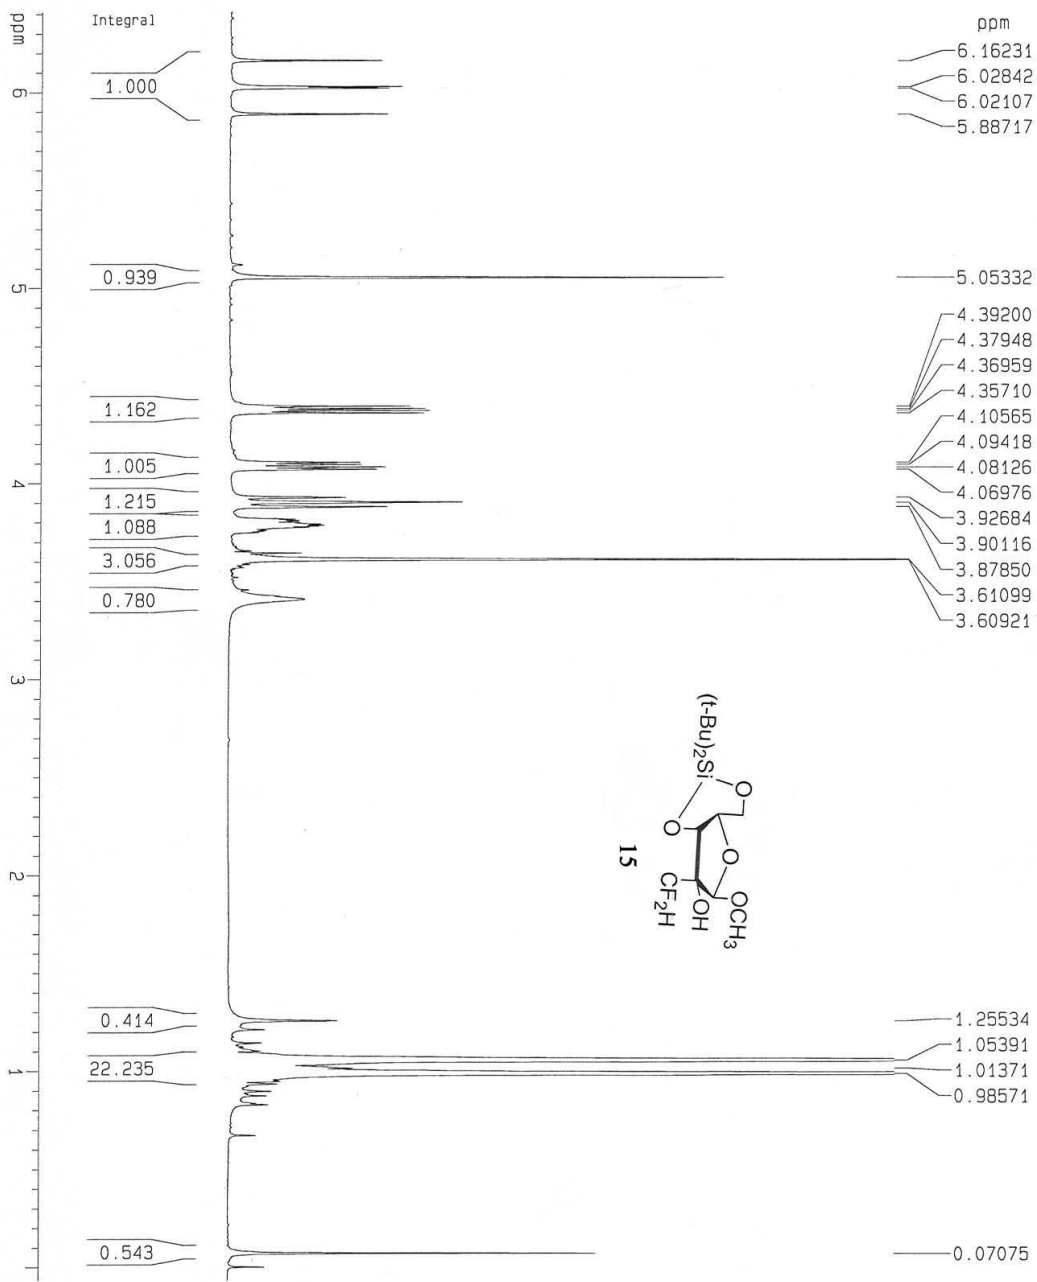

Current Data Parameters

|        |      |
|--------|------|
| NAME   | XWB1 |
| EXPNO  | 1    |
| PROCNO | 1    |

F2 - Acquisition Parameters

|         |                |
|---------|----------------|
| Date_   | 20021107       |
| Time    | 16.59          |
| INSTRUM | spect          |
| PROBHD  | 5 mm QNP 1H    |
| PULPROG | zg             |
| TD      | 16384          |
| SOLVENT | CDCl3          |
| NS      | 8              |
| DS      | 0              |
| SWH     | 4807.692 Hz    |
| FIDRES  | 0.293438 Hz    |
| AQ      | 1.7039860 sec  |
| RG      | 12.7           |
| DM      | 104.000 usec   |
| DE      | 6.00 usec      |
| TE      | 300.0 K        |
| D1      | 2.00000000 sec |

===== CHANNEL f1 =====

|      |                |
|------|----------------|
| NUC1 | 1H             |
| P1   | 10.50 usec     |
| PL1  | 0.00 dB        |
| SFO1 | 400.132007 MHz |

F2 - Processing parameters

|     |                |
|-----|----------------|
| SI  | 32768          |
| SF  | 400.130050 MHz |
| WDW | EM             |
| SSB | 0              |
| LB  | 0.30 Hz        |
| GB  | 0              |
| PC  | 1.00           |

1D NMR plot parameters

|       |                 |
|-------|-----------------|
| CX    | 20.00 cm        |
| F1P   | 6.411 ppm       |
| F1    | 2565.28 Hz      |
| F2P   | -0.067 ppm      |
| F2    | -26.69 Hz       |
| PPMCM | 0.32389 ppm/cm  |
| HZCM  | 129.59866 Hz/cm |

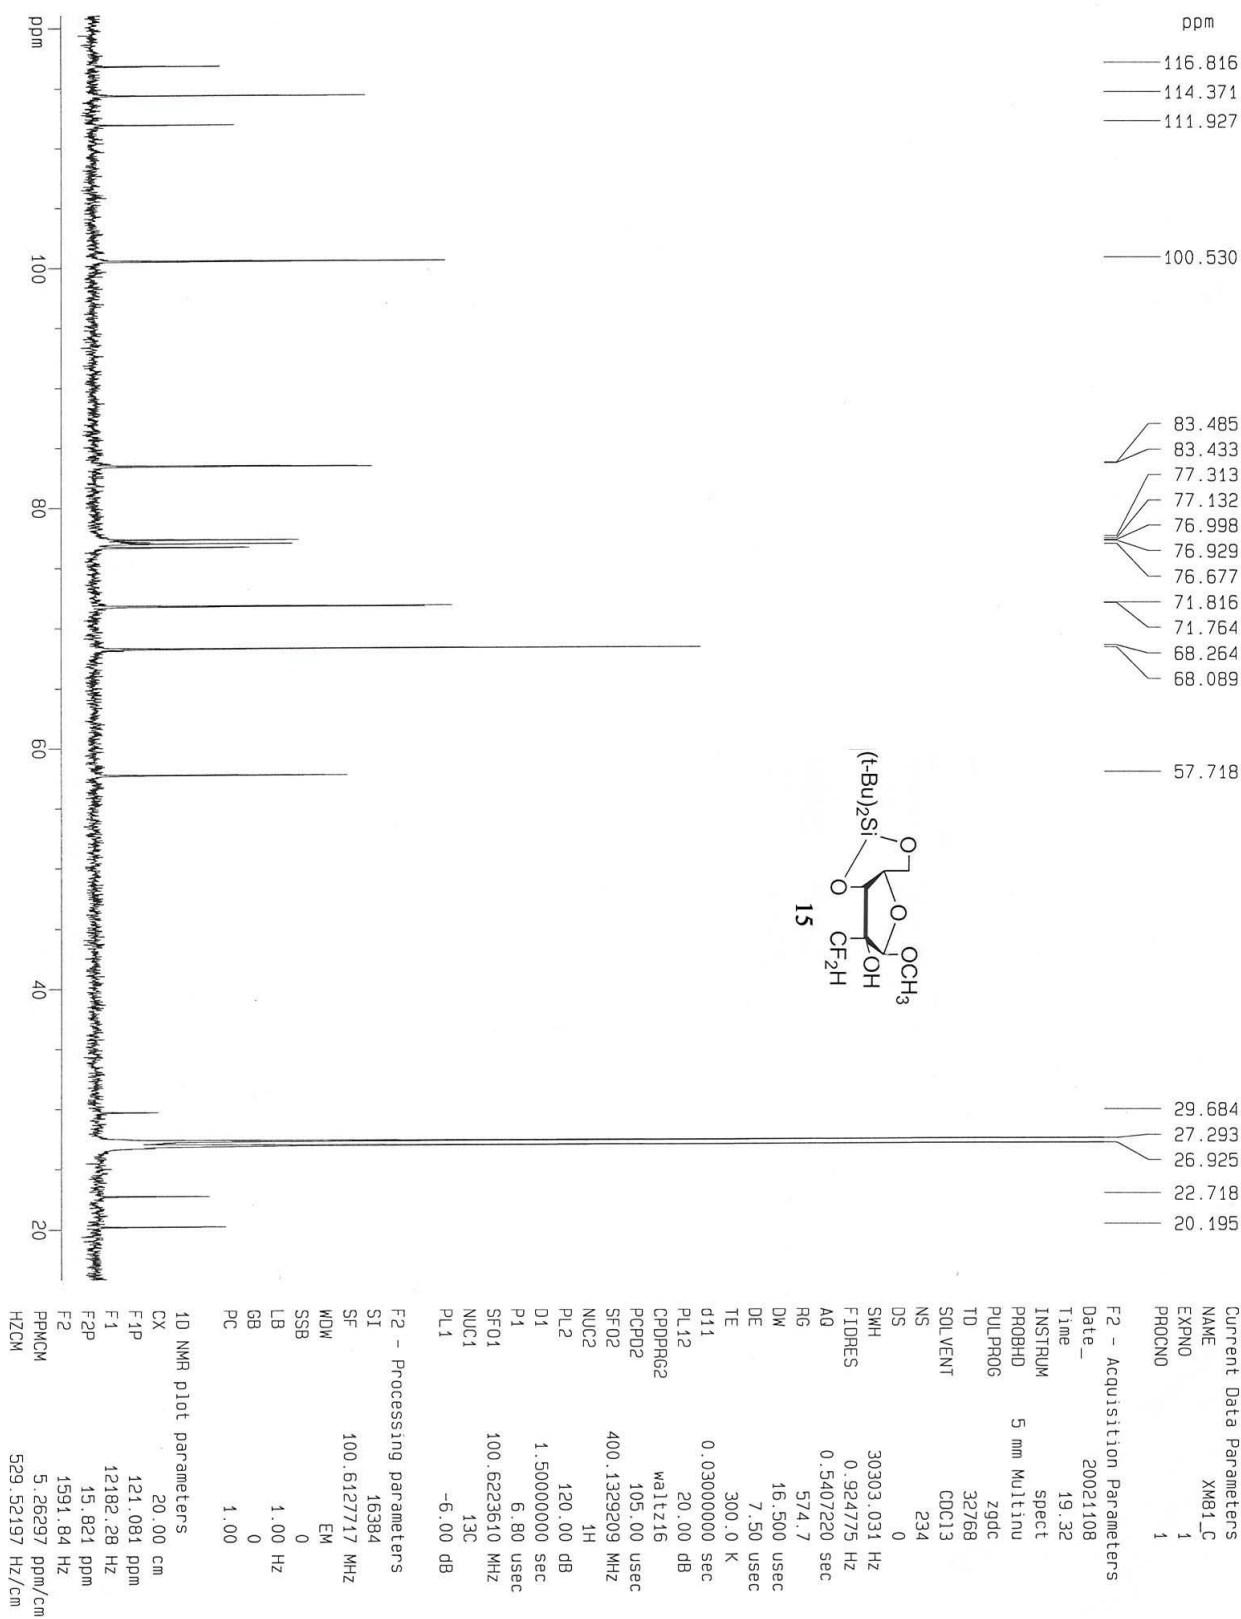

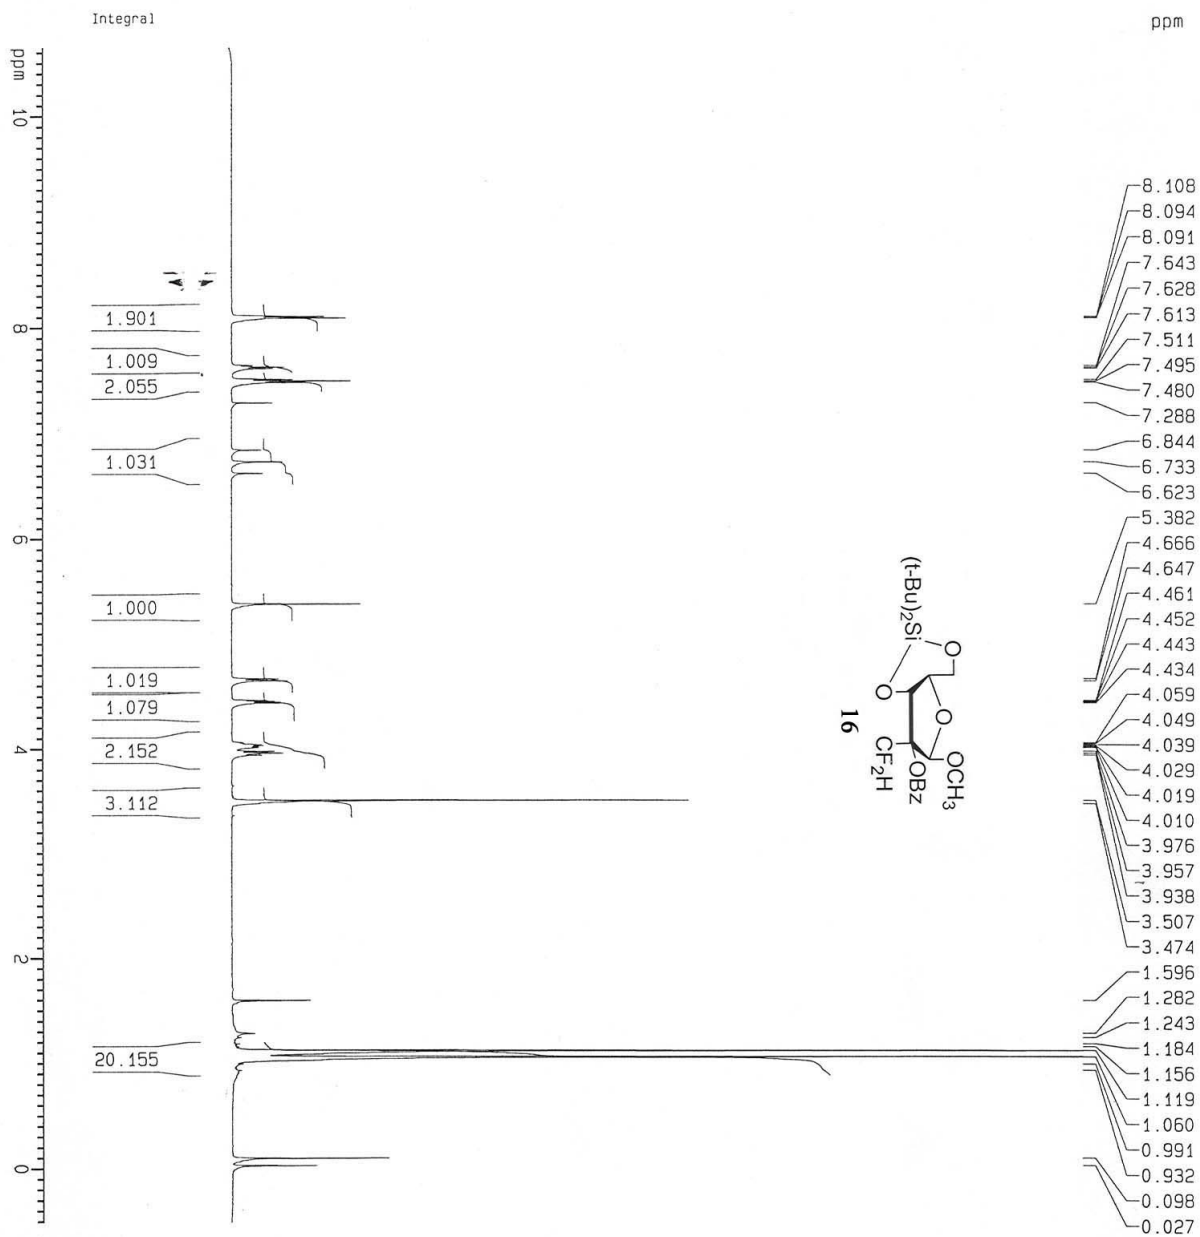

Current Data Parameters

NAME 1124a

EXPNO 1

PROCNO 1

F2 - Acquisition Parameters

Date\_ 971124

Time 12:59

INSTRUM spect

PROBHD 5 mm GNP 1H

PULPROG zg

TD 32768

SOLVENT CDCl3

NS 8

DS 0

SMH 5580.357 Hz

FIDRES 0.170299 Hz

AQ 2.9360628 sec

RG 64

DM 89.600 usec

DE 4.50 usec

TE 300.0 K

D1 1.0000000 sec

P1 8.00 usec

DE 4.50 usec

SFO1 500.132564 MHz

NUC1 1H

PL1 0.00 dB

F2 - Processing parameters

SI 16384

SF 500.1300000 MHz

WDW EM

SSB 0

LB 0.30 Hz

GB 0

PC 1.00

1D NMR plot parameters

CX 20.00 cm

F1P 11.000 ppm

F1 5501.43 Hz

F2P -1.000 ppm

F2 -500.13 Hz

PPMCM 0.60000 ppm/cm

HZCM 300.07800 Hz/cm

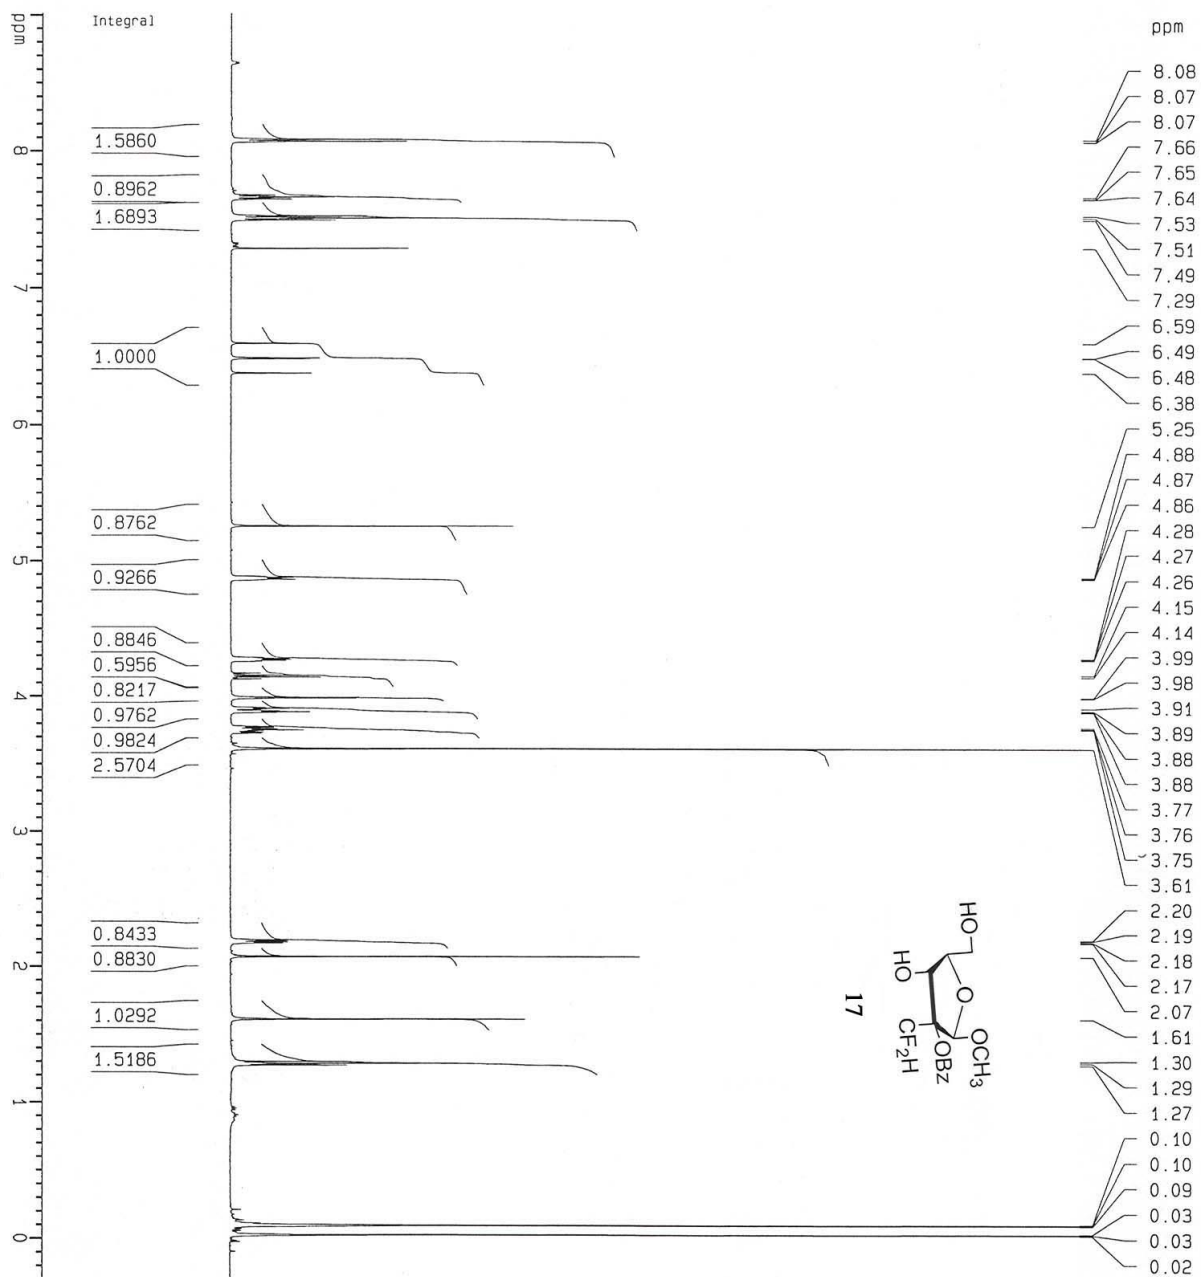

Current Data Parameters  
 NAME 062998a  
 EXPNO 1  
 PROCNO 1

F2 - Acquisition Parameters  
 Date\_ 980629  
 Time 19.21  
 INSTRUM spect  
 PROBD 5 mm QNP 1H  
 PULPROG zg  
 TD 32768  
 SOLVENT CDCl3  
 NS 8  
 DS 0  
 SWH 5580.357 Hz  
 FIDRES 0.170299 Hz  
 AQ 2.9360628 sec  
 RG 128  
 DM 89.600 usec  
 DE 4.50 usec  
 TE 300.0 K  
 D1 1.00000000 sec  
 P1 8.00 usec  
 DE 4.50 usec  
 SFO1 500.132564 MHz  
 NUC1 1H  
 PL1 0.00 dB

F2 - Processing parameters  
 SI 16384  
 SF 500.130000 MHz  
 WDW EM  
 SSB 0  
 LB 0.30 Hz  
 GB 0  
 PC 1.00

1D NMR plot parameters  
 CX 20.00 cm  
 F1P 9.012 ppm  
 F1 4507.36 Hz  
 F2P -0.286 ppm  
 F2 -142.92 Hz  
 PPKCM 0.46491 ppm/cm  
 HZCM 232.51491 Hz/cm

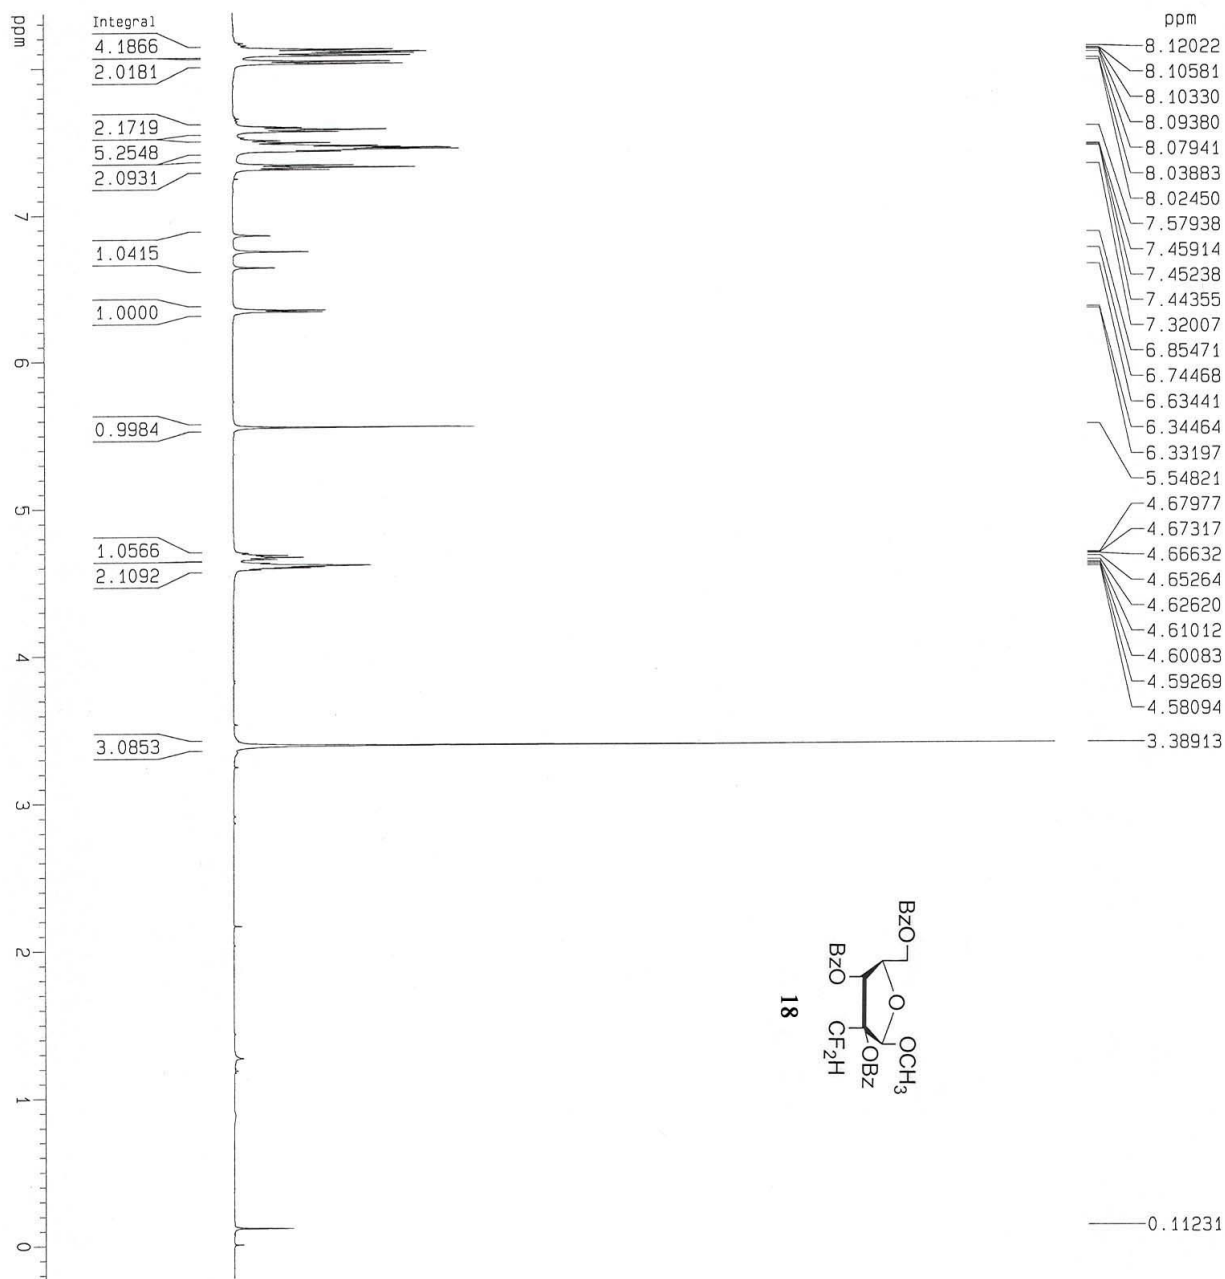

Current Data Parameters  
NAME XM84  
EXPNO 1  
PROCNO 1

F2 - Acquisition Parameters  
Date\_ 20021108  
Time 19.19  
INSTRUM spect  
PROBHD 5 mm Multinu  
PULPROG zg  
TD 32768  
SOLVENT CDCl<sub>3</sub>  
NS 8  
DS 0  
SMH 6009.615 Hz  
FIDRES 0.183399 Hz  
AQ 2.763477 sec  
RG 2  
DW 83.200 usec  
DE 4.50 usec  
TE 300.0 K  
D1 3.00000000 sec

===== CHANNEL f1 =====  
NUC1 1H  
P1 5.60 usec  
PL1 0.00 dB  
SFO1 500.132200 MHz

F2 - Processing parameters  
SI 16384  
SF 500.1300234 MHz  
WDW EM  
SSB 0  
LB 0.30 Hz  
GB 0  
PC 1.00

1D NMR plot parameters  
CX 20.00 cm  
F1P 8.371 ppm  
F1 4186.42 Hz  
F2P -0.224 ppm  
F2 -111.85 Hz  
PPMCK 0.42972 ppm/cm  
HZCM 214.91341 Hz/cm

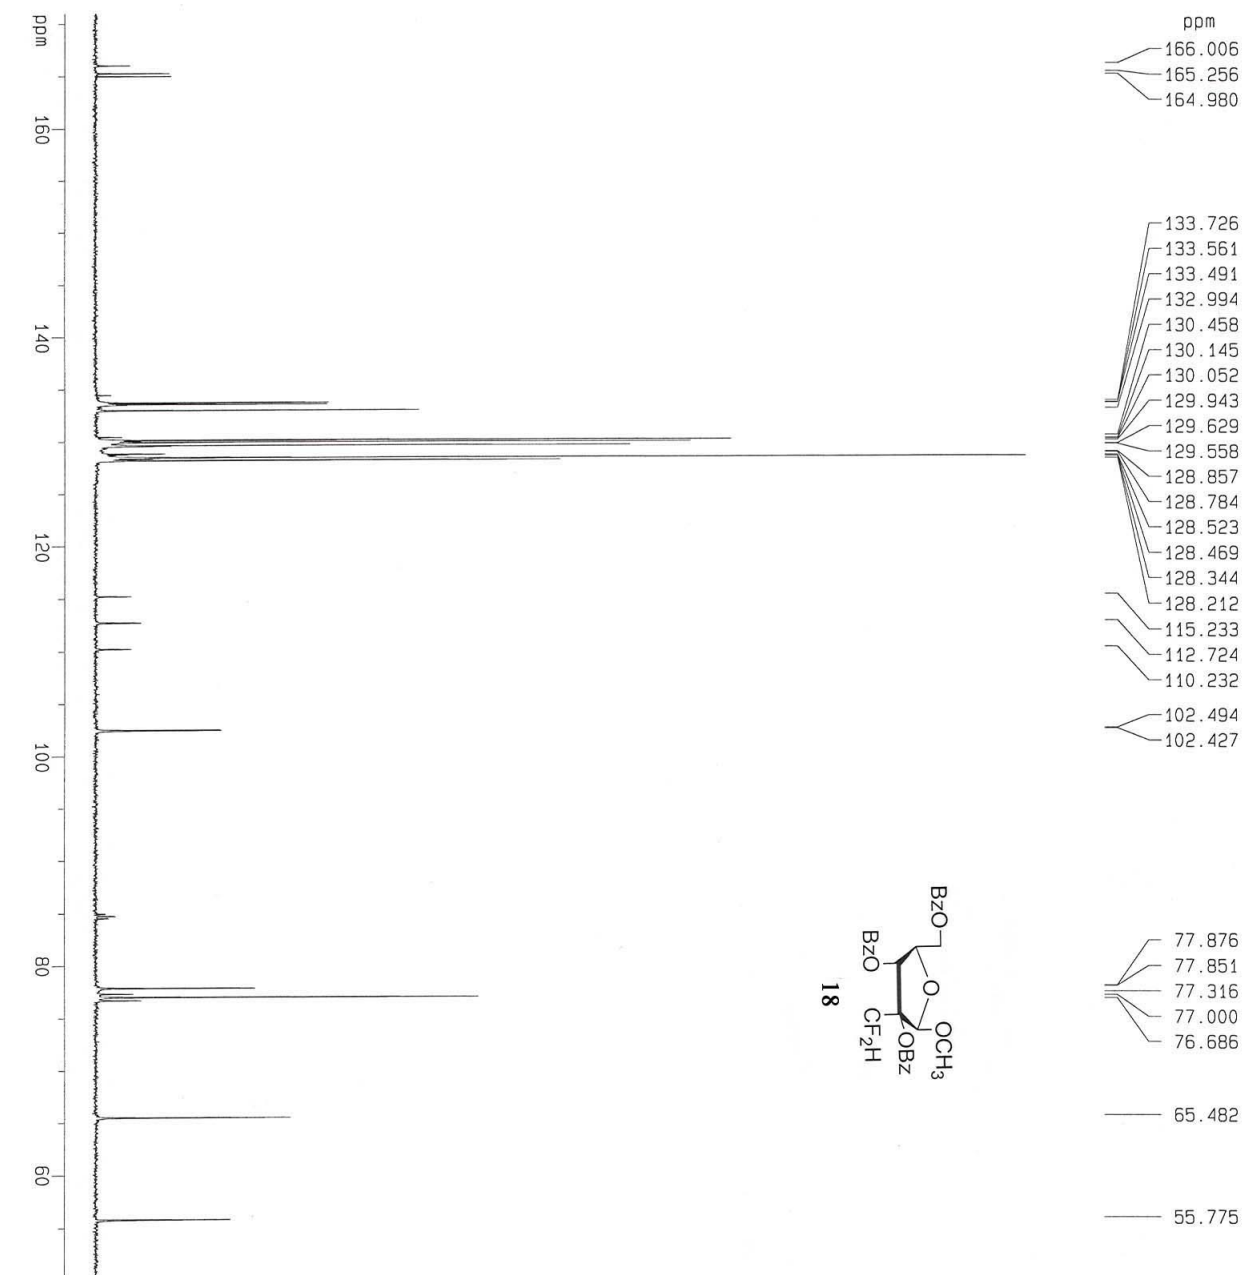

Current Data Parameters

| NAME   | VALUE |
|--------|-------|
| EXPNO  | 1     |
| PROCNO | 1     |

F2 - Acquisition Parameters

| Date_    | Time            |
|----------|-----------------|
| 20021108 | 19.41           |
| INSTRUM  | spect           |
| PROBHD   | 5 mm Multinu    |
| PULPROG  | zgpg            |
| TD       | 32768           |
| SOLVENT  | CDCl3           |
| NS       | 135             |
| DS       | 0               |
| SWH      | 30303.031 Hz    |
| FIDRES   | 0.924775 Hz     |
| AQ       | 0.5407220 sec   |
| R6       | 574.7           |
| DW       | 16.500 usec     |
| DE       | 7.50 usec       |
| TE       | 300.0 K         |
| d11      | 0.03000000 sec  |
| PL12     | 20.00 dB        |
| CPDPRG2  | waitz16         |
| PCPD2    | 105.00 usec     |
| SFO2     | 400.1329209 MHz |
| NUC2     | 1H              |
| PL2      | 120.00 dB       |
| D1       | 1.50000000 sec  |
| P1       | 6.80 usec       |
| SFO1     | 100.6223610 MHz |
| NUC1     | 13C             |
| PL1      | -6.00 dB        |

F2 - Processing parameters

| SI    | SI              |
|-------|-----------------|
| 16384 | 16384           |
| SF    | 100.6127828 MHz |
| WDW   | EM              |
| SSB   | 0               |
| LB    | 1.00 Hz         |
| GB    | 0               |
| PC    | 1.00            |

1D NMR plot parameters

| CX       | F1P         | F1          | F2P        | F2         | PPMCM          | HZCM            |
|----------|-------------|-------------|------------|------------|----------------|-----------------|
| 20.00 cm | 170.961 ppm | 17200.86 Hz | 50.487 ppm | 5079.65 Hz | 6.02369 ppm/cm | 606.06061 Hz/cm |

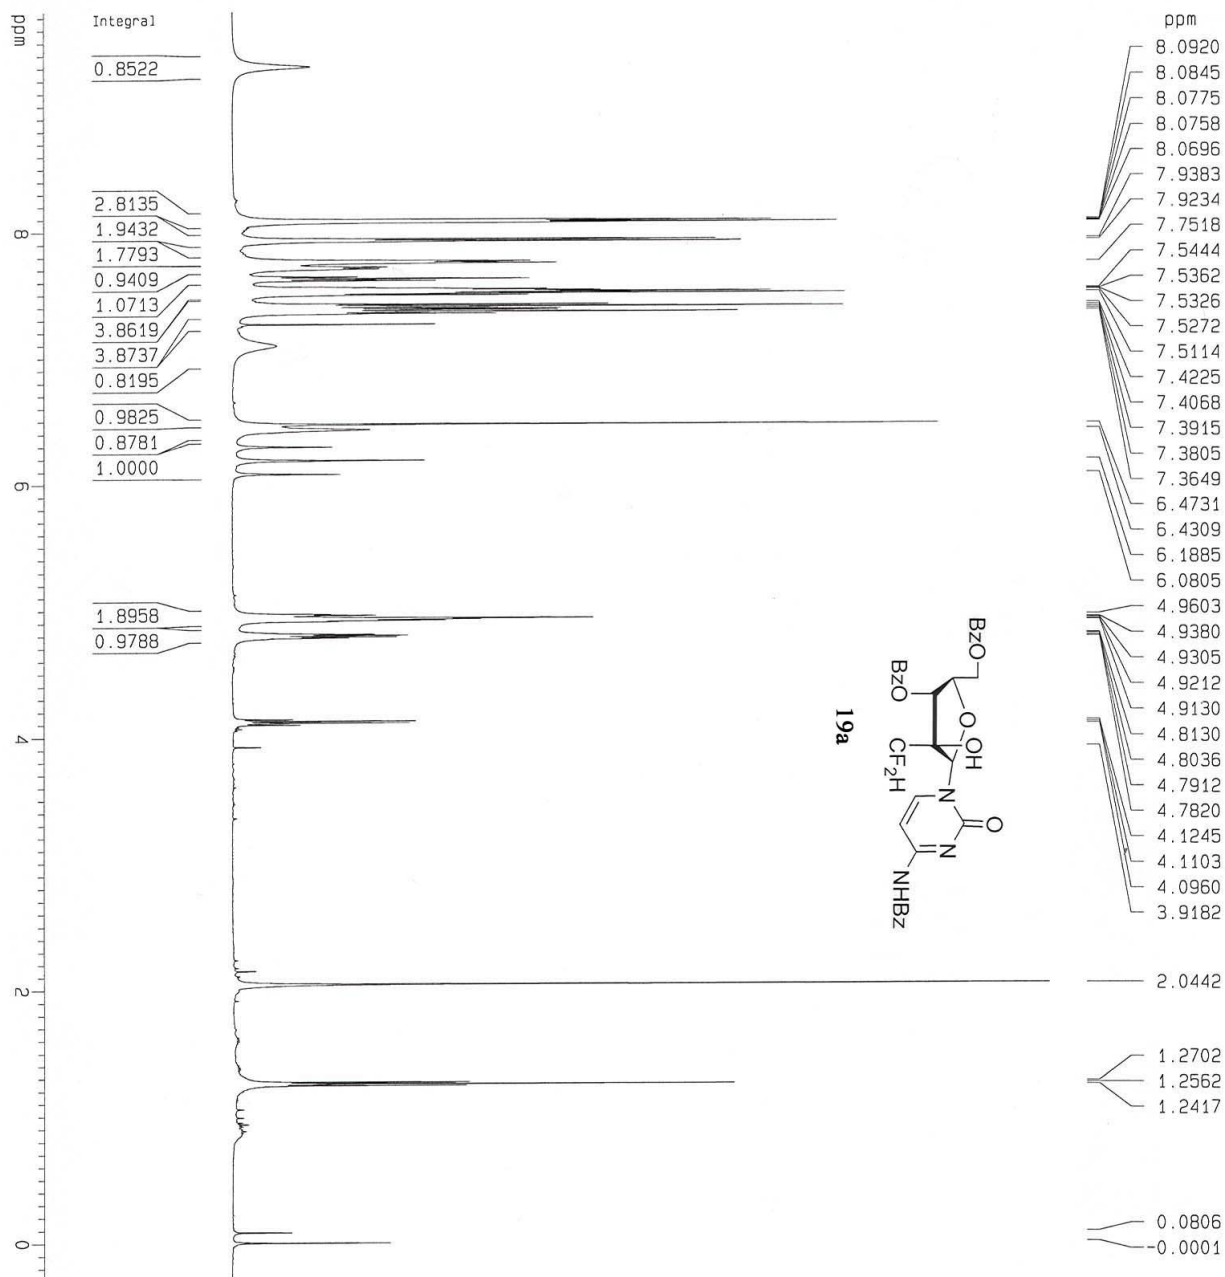

**Current Data Parameters**

|        |          |
|--------|----------|
| NAME   | XM85a1_3 |
| EXPNO  | 1        |
| PROCNO | 1        |

**F2 - Acquisition Parameters**

|         |                |
|---------|----------------|
| Date_   | 20021108       |
| Time    | 18.25          |
| INSTRUM | spect          |
| PROBHD  | 5 mm Multinu   |
| PULPROG | zg             |
| TD      | 32768          |
| SOLVENT | CDCl3          |
| NS      | 8              |
| DS      | 0              |
| SWH     | 6009.615 Hz    |
| FIDRES  | 0.18339 Hz     |
| AQ      | 2.7263477 sec  |
| RG      | 32             |
| DW      | 83.200 usec    |
| DE      | 4.50 usec      |
| TE      | 300.0 K        |
| D1      | 3.00000000 sec |

**F2 - Processing parameters**

|     |                 |
|-----|-----------------|
| SI  | 16384           |
| SF  | 500.1300124 MHz |
| WDW | EM              |
| SSB | 0               |
| LB  | 0.30 Hz         |
| GB  | 0               |
| PC  | 1.00            |

**1D NMR plot parameters**

|       |                 |
|-------|-----------------|
| CX    | 20.00 cm        |
| F1P   | 9.745 ppm       |
| F1    | 4874.00 Hz      |
| F2P   | -0.268 ppm      |
| F2    | -134.01 Hz      |
| PPMCM | 0.50067 ppm/cm  |
| HZCM  | 250.40063 Hz/cm |

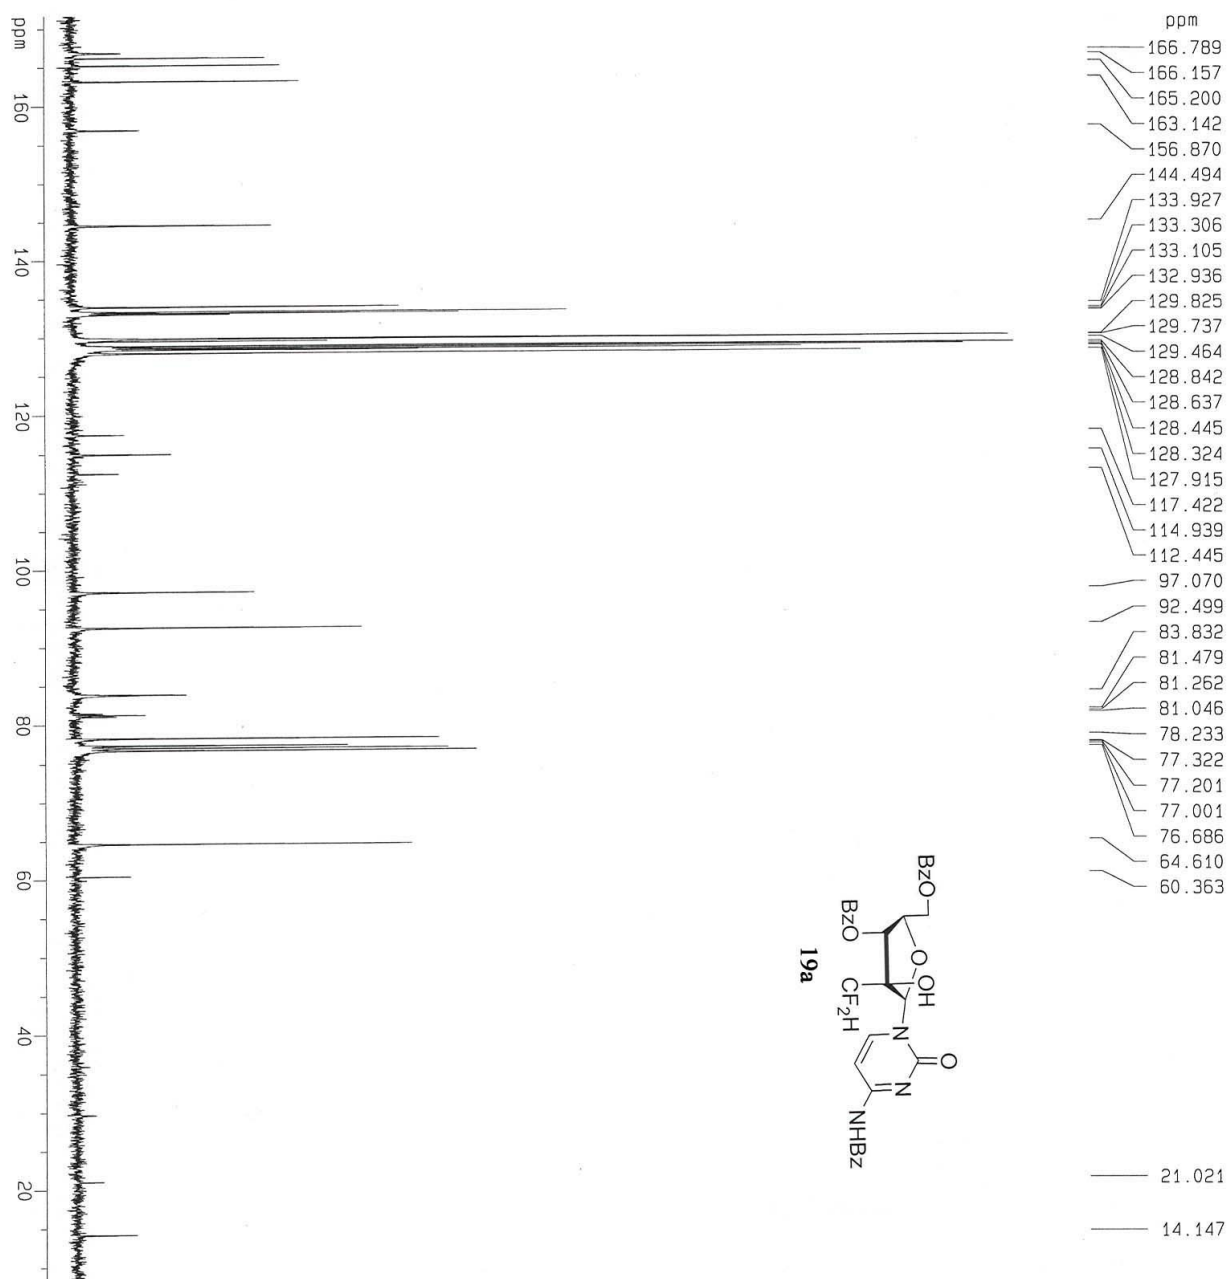

Current Data Parameters

|        |         |
|--------|---------|
| NAME   | XM85a_C |
| EXPNO  | 1       |
| PROCNO | 1       |

F2 - Acquisition Parameters

|         |                 |
|---------|-----------------|
| Date_   | 20021108        |
| Time    | 18.37           |
| INSTRUM | spect           |
| PROBHD  | 5 mm Multinu    |
| PULPROG | zgpg            |
| TD      | 32768           |
| SOLVENT | CDCl3           |
| NS      | 1154            |
| DS      | 0               |
| SWH     | 30303.031 Hz    |
| FIDRES  | 0.924775 Hz     |
| AQ      | 0.5407220 sec   |
| RG      | 574.7           |
| DW      | 16.500 usec     |
| DE      | 7.50 usec       |
| TE      | 300.0 K         |
| d11     | 0.03000000 sec  |
| PL12    | 20.00 dB        |
| CPDPRG2 | waitz16         |
| PCPD2   | 105.00 usec     |
| SFO2    | 400.1329209 MHz |
| NUC2    | <sup>13</sup> C |
| PL2     | 120.00 dB       |
| D1      | 1.50000000 sec  |
| P1      | 6.80 usec       |
| SFO1    | 100.6223610 MHz |
| NUC1    | <sup>13</sup> C |
| PL1     | -6.00 dB        |

F2 - Processing parameters

|     |                 |
|-----|-----------------|
| SI  | 16384           |
| SF  | 100.6127754 MHz |
| WDW | EM              |
| SSB | 0               |
| LB  | 1.00 Hz         |
| GB  | 0               |
| PC  | 1.00            |

1D NMR plot parameters

|       |                 |
|-------|-----------------|
| CX    | 20.00 cm        |
| F1P   | 171.655 ppm     |
| F1    | 17270.74 Hz     |
| F2P   | 8.333 ppm       |
| F2    | 838.37 Hz       |
| PPMCM | 8.16614 ppm/cm  |
| HZCM  | 821.61835 Hz/cm |

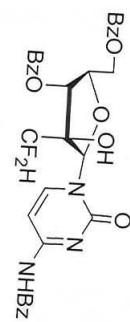

19a

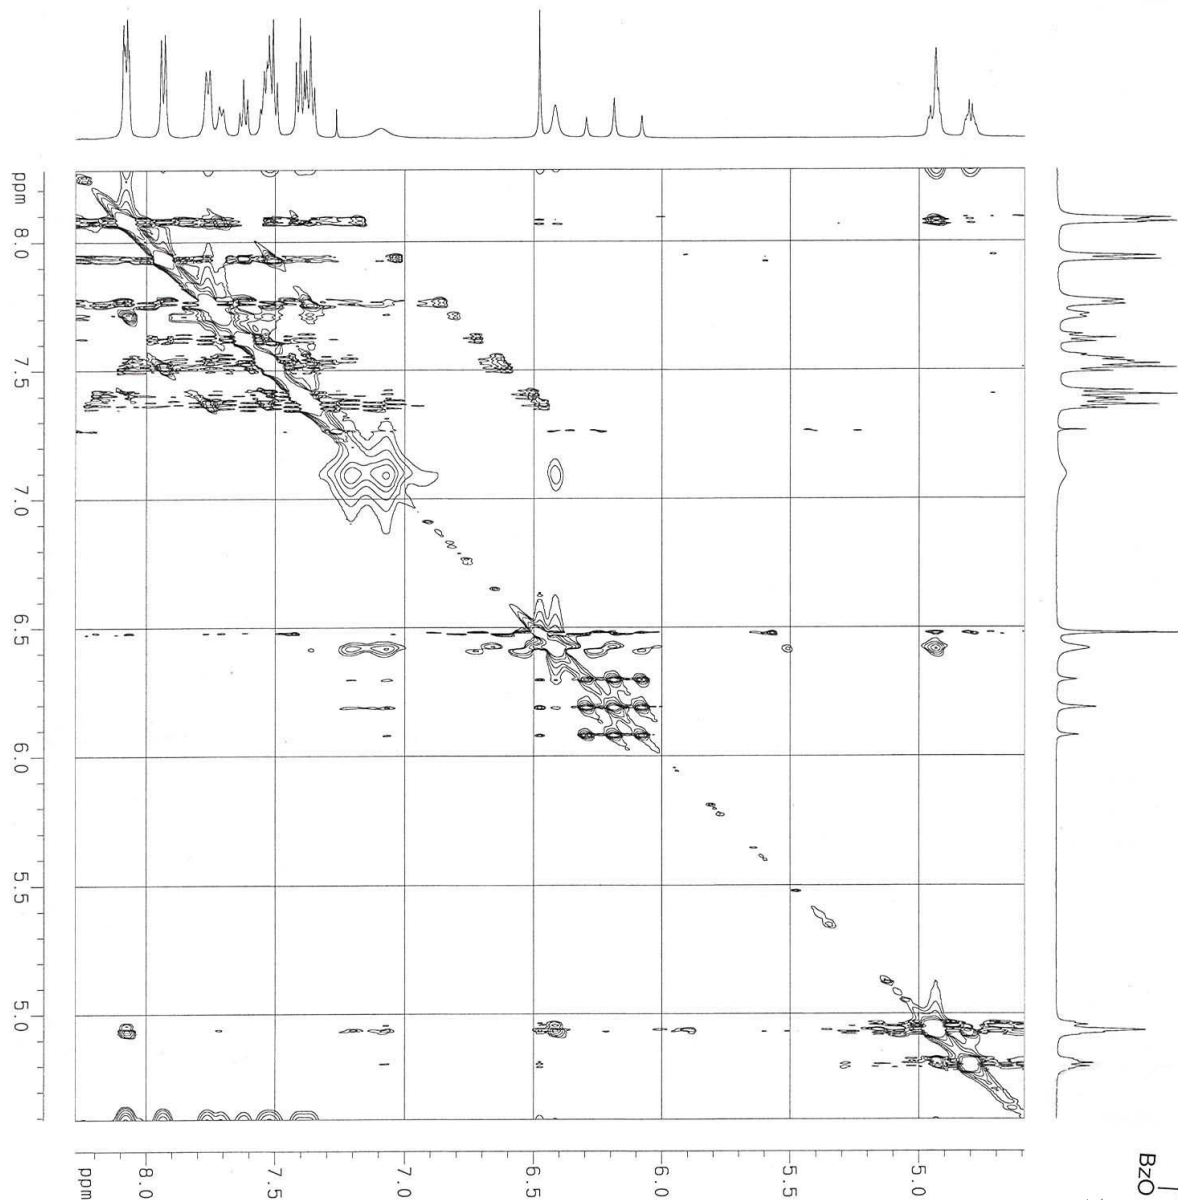

Current Data Parameters

|        |        |        |
|--------|--------|--------|
| NAME   | NAME   | NAME   |
| EXPNO  | EXPNO  | EXPNO  |
| PROCNO | PROCNO | PROCNO |

F2 - Acquisition Parameters

|         |               |
|---------|---------------|
| Date_   | 20081113      |
| Time    | 10.12         |
| INSTRUM | spect         |
| PROBHD  | 5 mm WALTIN   |
| PULPROG | zgpg30        |
| TD      | 2048          |
| SOLVENT | CDCl3         |
| NS      | 16            |
| DS      | 16            |
| SWH     | 1643.559 Hz   |
| FIDRES  | 0.500224 Hz   |
| AQ      | 0.5554676 sec |
| RG      | 20            |
| DM      | 271.200 usec  |
| DE      | 1.50 usec     |
| TE      | 300.2 K       |
| TD      | 0.0000000 sec |
| D1      | 2.0000000 sec |
| D9      | 0.7500000 sec |
| INO     | 0.0002720 sec |

===== CHANNEL f1 =====

|      |                |
|------|----------------|
| NUC1 | <sup>1</sup> H |
| P1   | 5.00 usec      |
| PL1  | 0.00 dB        |
| SFO1 | 500.133256 MHz |

F1 - Acquisition Parameters

|     |         |
|-----|---------|
| WDW | EM      |
| SSB | 0       |
| LB  | 0.00 Hz |
| GB  | 0       |
| PC  | 1.00    |

F2 - Processing Parameters

|     |                 |
|-----|-----------------|
| SI  | 2048            |
| SF  | 500.1300114 MHz |
| WDW | EM              |
| SSB | 0               |
| LB  | 0.00 Hz         |
| GB  | 0               |
| PC  | 1.00            |

F1 - Processing Parameters

|     |                 |
|-----|-----------------|
| SI  | 1024            |
| SF  | 500.1300114 MHz |
| WDW | EM              |
| SSB | 0               |
| LB  | 0.00 Hz         |
| GB  | 0               |
| PC  | 1.00            |

2D NMR Plot Parameters

|        |             |
|--------|-------------|
| DX2    | 15.00 cm    |
| DX1    | 15.00 cm    |
| F2LO   | 8.278 ppm   |
| F2H1   | 4.139.59 Hz |
| F2H2   | 4.139.59 Hz |
| F2H3   | 2295.228 Hz |
| F2H4   | 4.139.59 Hz |
| F2H5   | 4.139.59 Hz |
| F2H6   | 4.139.59 Hz |
| F2H7   | 4.139.59 Hz |
| F2H8   | 4.139.59 Hz |
| F2H9   | 4.139.59 Hz |
| F2H10  | 4.139.59 Hz |
| F2H11  | 4.139.59 Hz |
| F2H12  | 4.139.59 Hz |
| F2H13  | 4.139.59 Hz |
| F2H14  | 4.139.59 Hz |
| F2H15  | 4.139.59 Hz |
| F2H16  | 4.139.59 Hz |
| F2H17  | 4.139.59 Hz |
| F2H18  | 4.139.59 Hz |
| F2H19  | 4.139.59 Hz |
| F2H20  | 4.139.59 Hz |
| F2H21  | 4.139.59 Hz |
| F2H22  | 4.139.59 Hz |
| F2H23  | 4.139.59 Hz |
| F2H24  | 4.139.59 Hz |
| F2H25  | 4.139.59 Hz |
| F2H26  | 4.139.59 Hz |
| F2H27  | 4.139.59 Hz |
| F2H28  | 4.139.59 Hz |
| F2H29  | 4.139.59 Hz |
| F2H30  | 4.139.59 Hz |
| F2H31  | 4.139.59 Hz |
| F2H32  | 4.139.59 Hz |
| F2H33  | 4.139.59 Hz |
| F2H34  | 4.139.59 Hz |
| F2H35  | 4.139.59 Hz |
| F2H36  | 4.139.59 Hz |
| F2H37  | 4.139.59 Hz |
| F2H38  | 4.139.59 Hz |
| F2H39  | 4.139.59 Hz |
| F2H40  | 4.139.59 Hz |
| F2H41  | 4.139.59 Hz |
| F2H42  | 4.139.59 Hz |
| F2H43  | 4.139.59 Hz |
| F2H44  | 4.139.59 Hz |
| F2H45  | 4.139.59 Hz |
| F2H46  | 4.139.59 Hz |
| F2H47  | 4.139.59 Hz |
| F2H48  | 4.139.59 Hz |
| F2H49  | 4.139.59 Hz |
| F2H50  | 4.139.59 Hz |
| F2H51  | 4.139.59 Hz |
| F2H52  | 4.139.59 Hz |
| F2H53  | 4.139.59 Hz |
| F2H54  | 4.139.59 Hz |
| F2H55  | 4.139.59 Hz |
| F2H56  | 4.139.59 Hz |
| F2H57  | 4.139.59 Hz |
| F2H58  | 4.139.59 Hz |
| F2H59  | 4.139.59 Hz |
| F2H60  | 4.139.59 Hz |
| F2H61  | 4.139.59 Hz |
| F2H62  | 4.139.59 Hz |
| F2H63  | 4.139.59 Hz |
| F2H64  | 4.139.59 Hz |
| F2H65  | 4.139.59 Hz |
| F2H66  | 4.139.59 Hz |
| F2H67  | 4.139.59 Hz |
| F2H68  | 4.139.59 Hz |
| F2H69  | 4.139.59 Hz |
| F2H70  | 4.139.59 Hz |
| F2H71  | 4.139.59 Hz |
| F2H72  | 4.139.59 Hz |
| F2H73  | 4.139.59 Hz |
| F2H74  | 4.139.59 Hz |
| F2H75  | 4.139.59 Hz |
| F2H76  | 4.139.59 Hz |
| F2H77  | 4.139.59 Hz |
| F2H78  | 4.139.59 Hz |
| F2H79  | 4.139.59 Hz |
| F2H80  | 4.139.59 Hz |
| F2H81  | 4.139.59 Hz |
| F2H82  | 4.139.59 Hz |
| F2H83  | 4.139.59 Hz |
| F2H84  | 4.139.59 Hz |
| F2H85  | 4.139.59 Hz |
| F2H86  | 4.139.59 Hz |
| F2H87  | 4.139.59 Hz |
| F2H88  | 4.139.59 Hz |
| F2H89  | 4.139.59 Hz |
| F2H90  | 4.139.59 Hz |
| F2H91  | 4.139.59 Hz |
| F2H92  | 4.139.59 Hz |
| F2H93  | 4.139.59 Hz |
| F2H94  | 4.139.59 Hz |
| F2H95  | 4.139.59 Hz |
| F2H96  | 4.139.59 Hz |
| F2H97  | 4.139.59 Hz |
| F2H98  | 4.139.59 Hz |
| F2H99  | 4.139.59 Hz |
| F2H100 | 4.139.59 Hz |

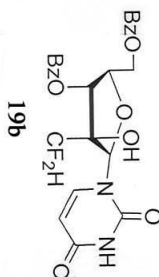

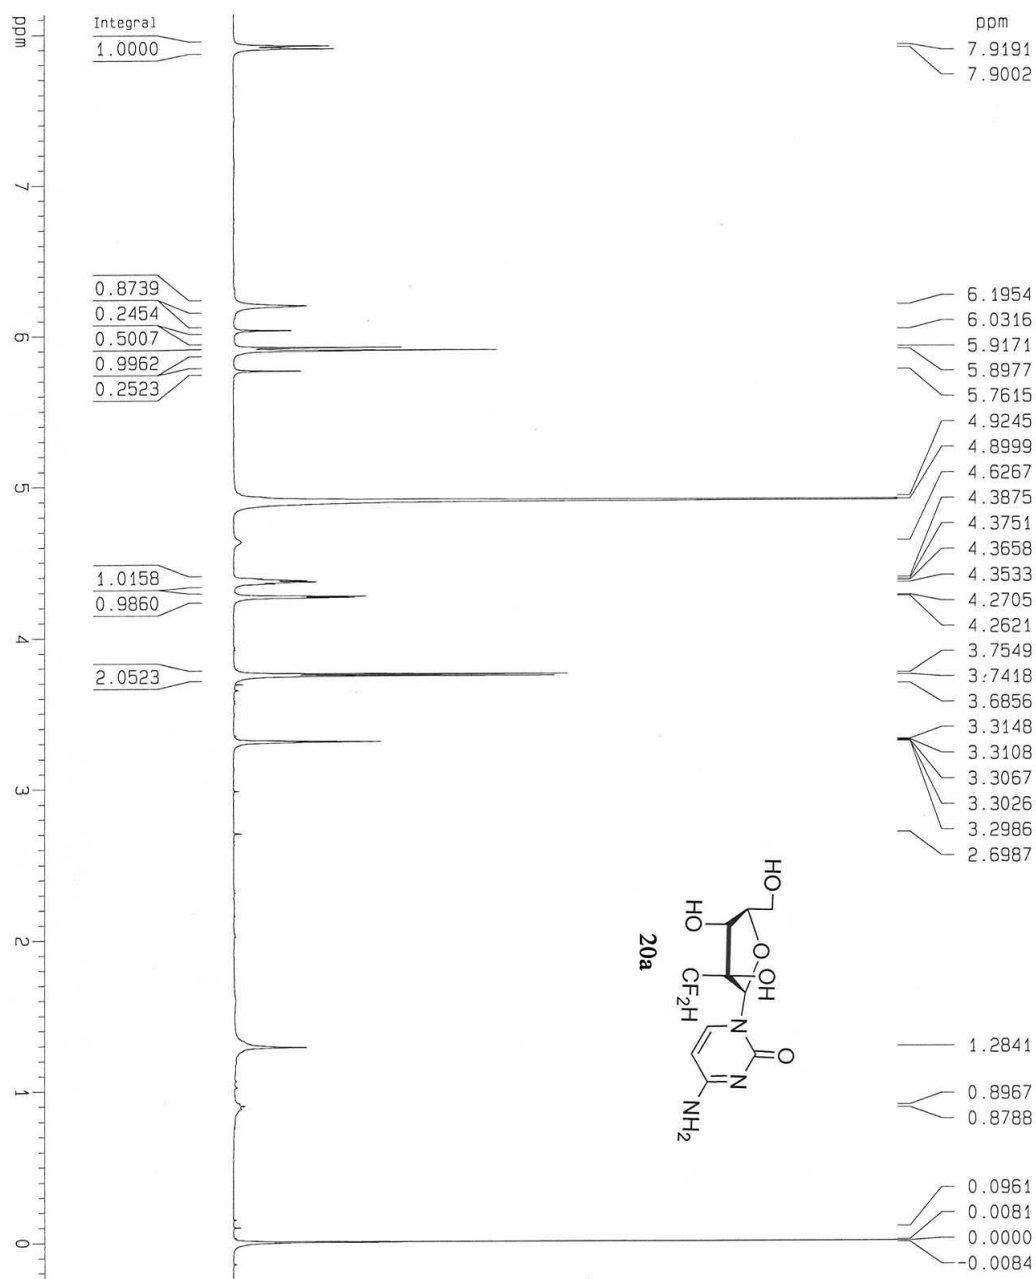

Current Data Parameters

NAME XMR6a

EXPNO 1

PROCNO 1

F2 - Acquisition Parameters

Date\_ 20021108

Time 19.50

INSTRUM spect

PROBHD 5 mm Multinu

PULPROG zg

TD 39046

SOLVENT DMSO

NS 8

DS 0

SWH 4807.692 Hz

FIDRES 0.123429 Hz

AQ 4.0608339 sec

RG 35.9

DM 104.000 usec

DE 7.00 usec

TE 300.0 K

D1 2.00000000 sec

P1 7.70 usec

SFO1 400.1317512 MHz

NUC1 1H

PL1 -6.00 dB

F2 - Processing parameters

SI 32768

SF 400.1300085 MHz

WDW EM

SSB 0

LB 0.30 Hz

GB 0

PC 1.00

10 NMR plot parameters

CX 20.00 cm

F1P 8.133 ppm

F1 3254.43 Hz

F2P -0.240 ppm

F2 -96.09 Hz

PPMCK 0.41868 ppm/cm

HZCM 167.52579 Hz/cm

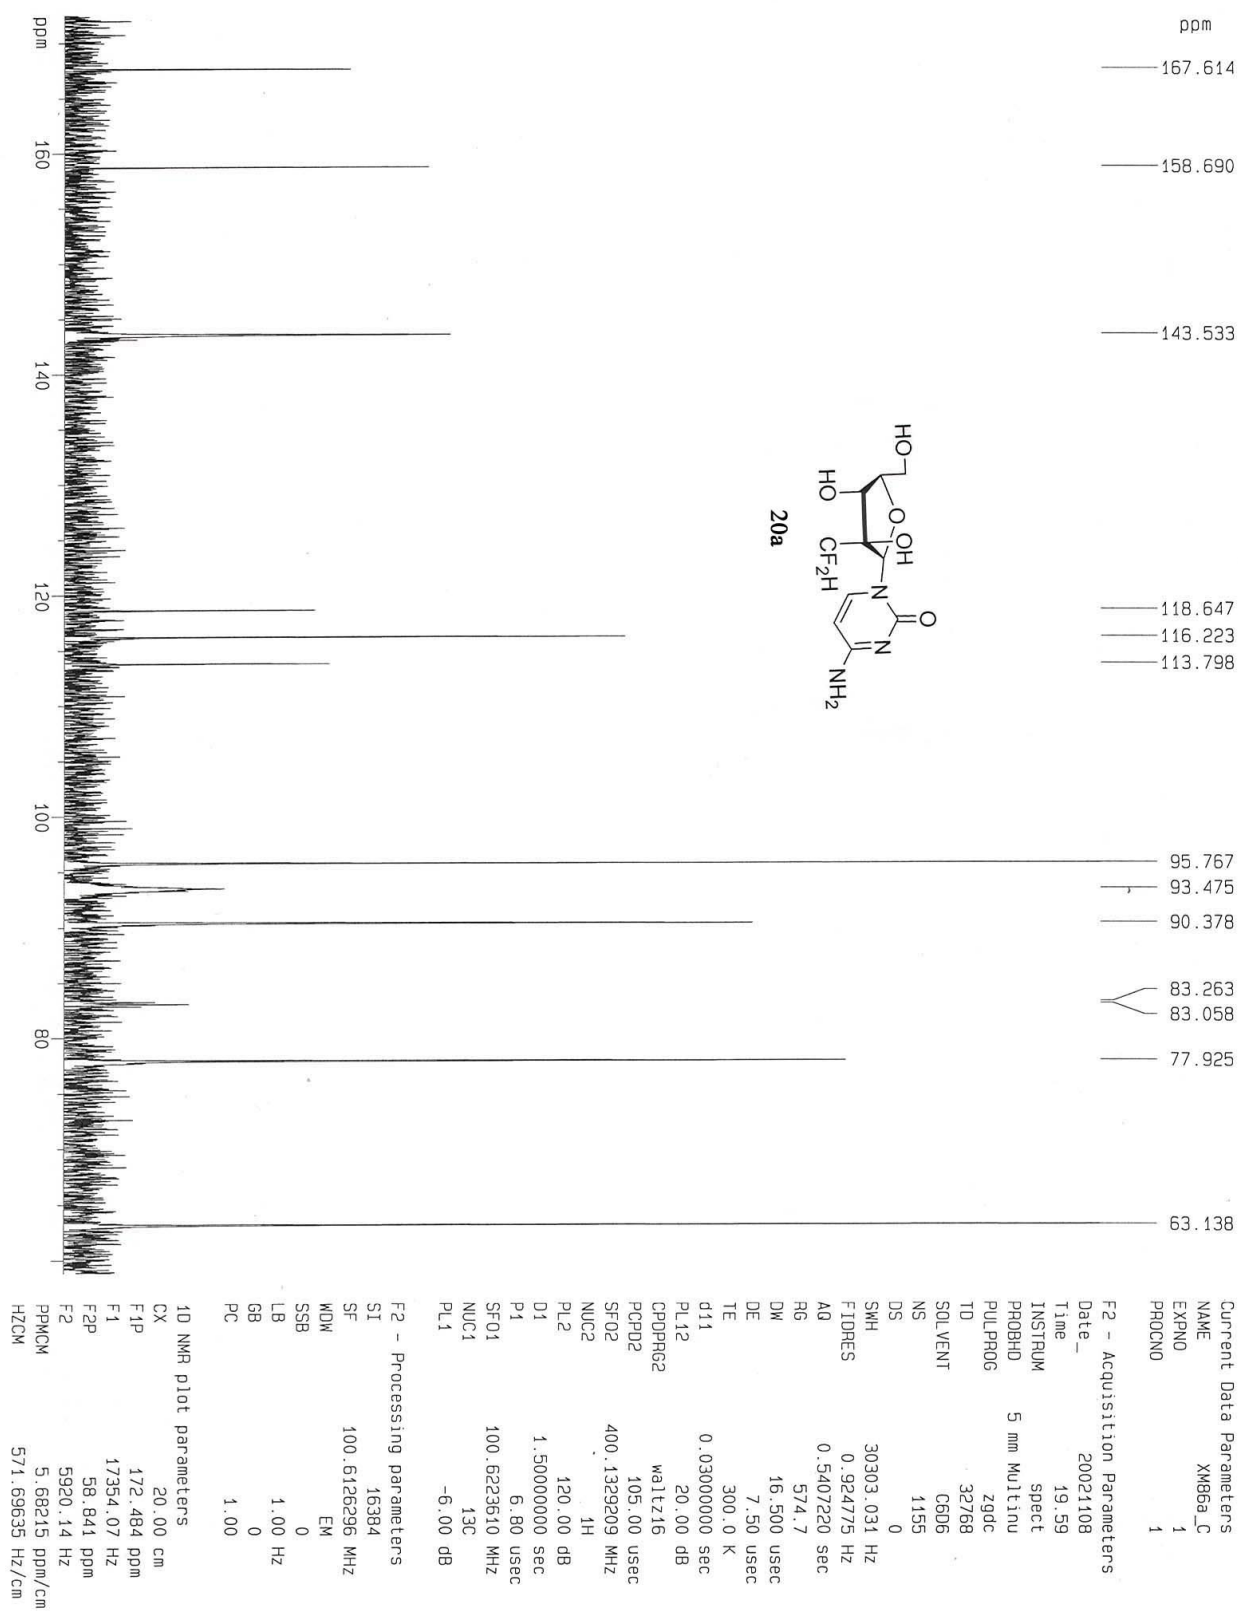

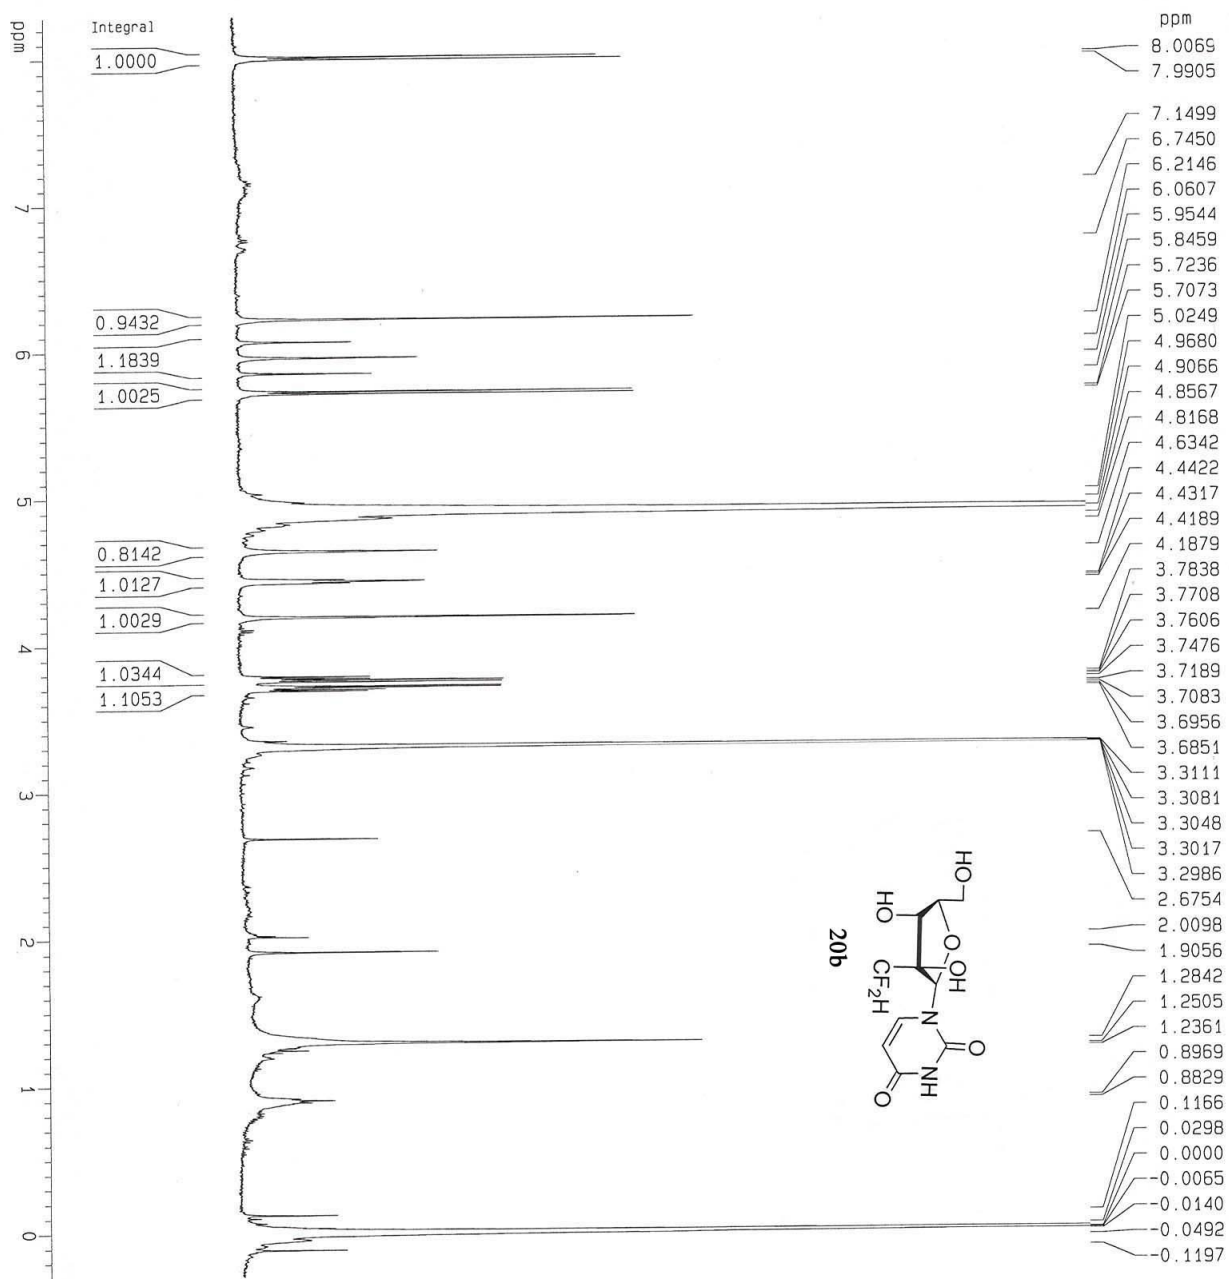

Current Data Parameters

| NAME   | VALUE |
|--------|-------|
| EXPNO  | 1     |
| PROCNO | 1     |

F2 - Acquisition Parameters

| Parameter | Value          |
|-----------|----------------|
| Date_     | 20021108       |
| Time      | 20.02          |
| INSTRUM   | spect          |
| PROBHD    | 5 mm Multinu   |
| PULPROG   | zg             |
| TD        | 32768          |
| SOLVENT   | MeOH           |
| NS        | 8              |
| DS        | 0              |
| SWH       | 6009.615 Hz    |
| FIDRES    | 0.183389 Hz    |
| AQ        | 2.7263477 sec  |
| RG        | 128            |
| DW        | 83.200 usec    |
| DE        | 4.50 usec      |
| TE        | 300.0 K        |
| D1        | 3.00000000 sec |

===== CHANNEL f1 =====

| Parameter | Value           |
|-----------|-----------------|
| NUC1      | <sup>1</sup> H  |
| P1        | 5.60 usec       |
| PL1       | 0.00 dB         |
| SFO1      | 500.1322000 MHz |

F2 - Processing parameters

| Parameter | Value           |
|-----------|-----------------|
| SI        | 16384           |
| SF        | 500.1300139 MHz |
| WDW       | EM              |
| SSB       | 0               |
| LB        | 0.30 Hz         |
| GB        | 0               |
| PC        | 1.00            |

1D NMR plot parameters

| Parameter | Value           |
|-----------|-----------------|
| CX        | 20.00 cm        |
| F1P       | 8.284 ppm       |
| F1        | 4142.89 Hz      |
| F2P       | -0.297 ppm      |
| F2        | -148.75 Hz      |
| PPMCM     | 0.42905 ppm/cm  |
| HZCM      | 214.58174 Hz/cm |

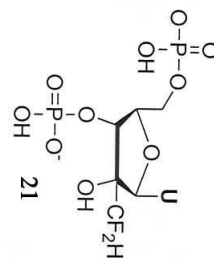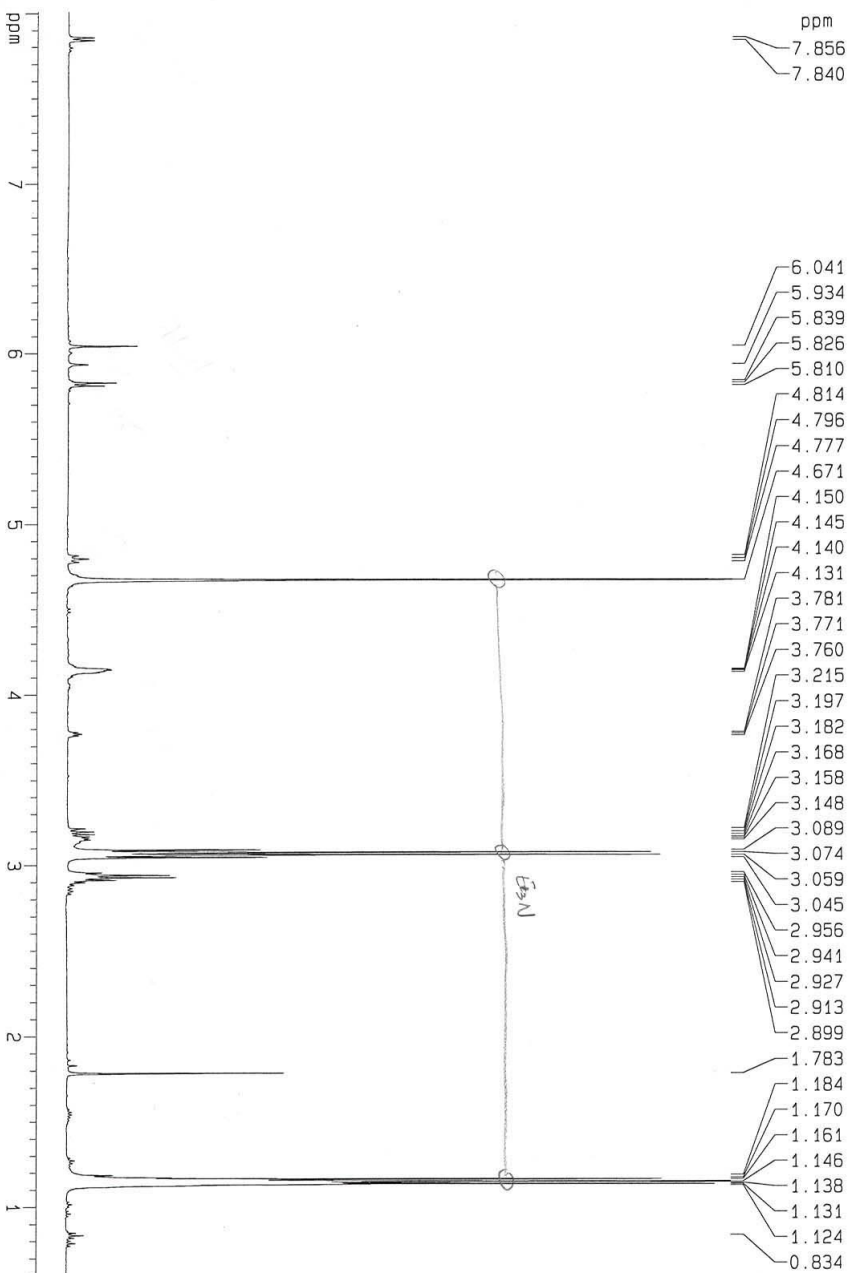

Current Data Parameters  
NAME A129\_H  
EXPNO 1  
PROCNO 1

F2 - Acquisition Parameters  
Date\_ 20020516  
Time 15.32  
INSTRUM spect  
PROBHD 5 mm QNP 1H  
PULPROG zg  
TD 32768  
SOLVENT CDCl3  
NS 8  
DS 0  
SWH 5208.333 Hz  
FIDRES 0.158946 Hz  
AQ 3.145779 sec  
RG 256  
DM 96.000 usec  
DE 4.50 usec  
TE 300.0 K  
D1 2.00000000 sec

===== CHANNEL f1 =====  
NUC1 1H  
P1 10.00 usec  
PL1 0.00 dB  
SF01 500.1320118 MHz

F2 - Processing parameters  
SI 16384  
SF 500.1300181 MHz  
WDW EM  
SSB 0  
LB 0.30 Hz  
GB 0  
PC 1.00

1D NMR plot parameters  
CX 20.00 cm  
FIP 8.009 ppm  
F1 4005.78 Hz  
F2P 0.5585 ppm  
F2 297.86 Hz  
PPMCM 0.37070 ppm/cm  
HZCM 185.39598 Hz/cm

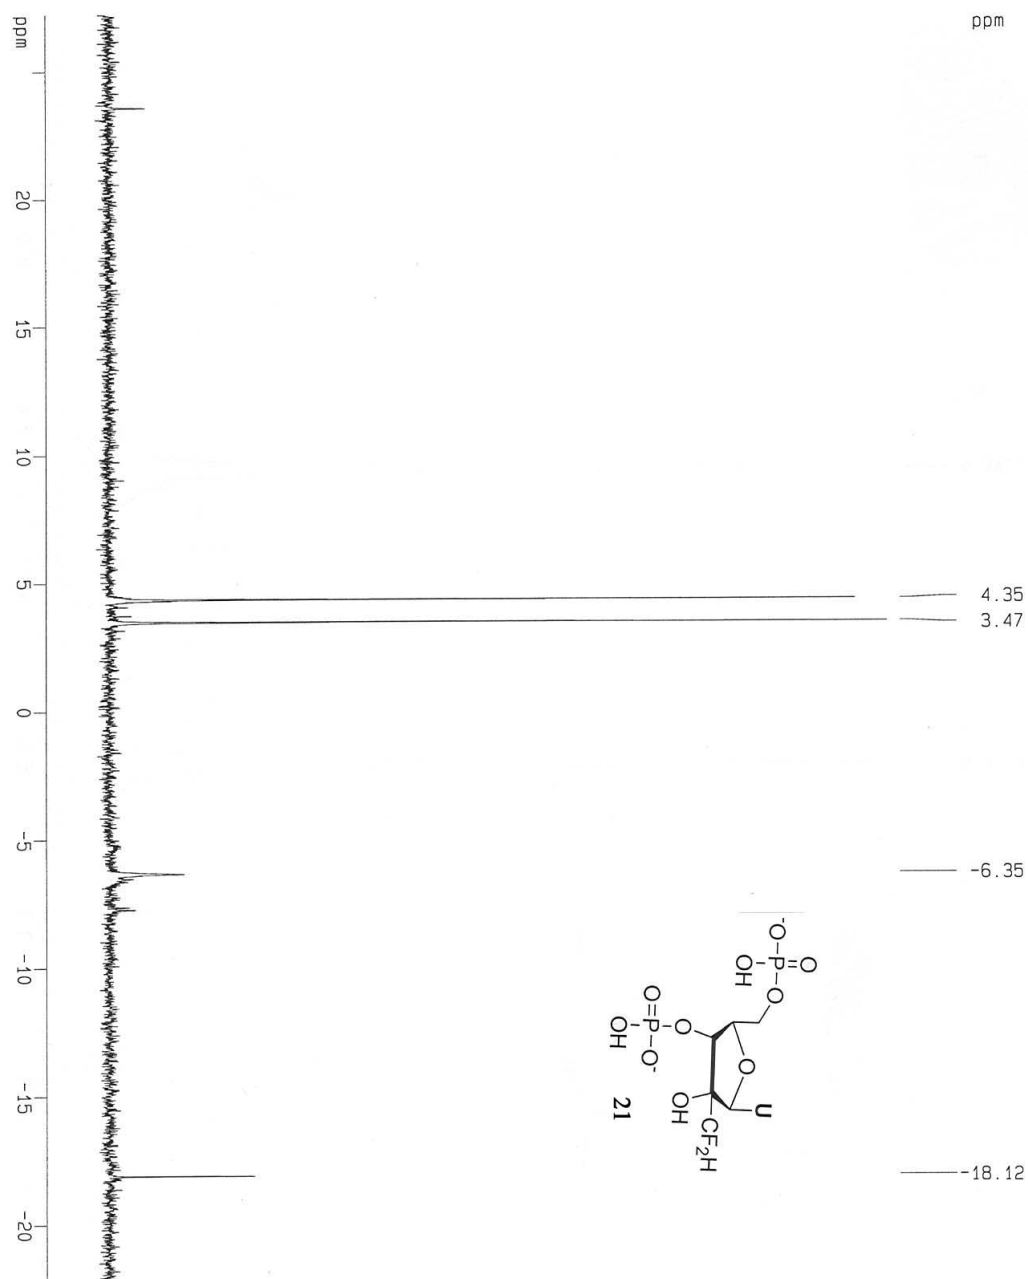

Current Data Parameters

|        |          |
|--------|----------|
| NAME   | A129_P_2 |
| EXPNO  | 1        |
| PROCNO | 1        |

F2 - Acquisition Parameters

|         |                |
|---------|----------------|
| Date_   | 20020517       |
| Time    | 11.43          |
| INSTRUM | spect          |
| PROBHD  | 5 mm QNP 1H    |
| PULPROG | zgpg           |
| TD      | 65536          |
| SOLVENT | D2O            |
| NS      | 16             |
| DS      | 1              |
| SWH     | 60790.273 Hz   |
| FIDRES  | 0.927586 Hz    |
| AQ      | 0.5390836 sec  |
| R6      | 16384          |
| DM      | 8.225 usec     |
| DE      | 11.75 usec     |
| TE      | 300.0 K        |
| D1      | 1.50000000 sec |
| D11     | 0.03000000 sec |

===== CHANNEL f1 =====

|      |                 |
|------|-----------------|
| NUC1 | 31P             |
| P1   | 5.00 usec       |
| PL1  | 0.00 dB         |
| SFO1 | 202.4560850 MHz |

===== CHANNEL f2 =====

|         |                 |
|---------|-----------------|
| CPDPRG2 | waltz16         |
| NUC2    | 1H              |
| PCPD2   | 100.00 usec     |
| PL2     | 120.00 dB       |
| PL12    | 23.00 dB        |
| SFO2    | 500.1320005 MHz |

F2 - Processing parameters

|     |                 |
|-----|-----------------|
| SI  | 32768           |
| SF  | 202.4556064 MHz |
| WDW | EM              |
| SSB | 0               |
| LB  | 1.00 Hz         |
| GB  | 0               |
| PC  | 1.40            |

10 NMR plot parameters

|       |                 |
|-------|-----------------|
| CX    | 20.00 cm        |
| F1P   | 27.221 ppm      |
| F1    | 5510.94 Hz      |
| F2P   | -22.161 ppm     |
| F2    | -4486.57 Hz     |
| PPMCM | 2.46906 ppm/cm  |
| HZCM  | 499.87589 Hz/cm |

# Spectrum Report

Final - Total Shots 500 - Position D7

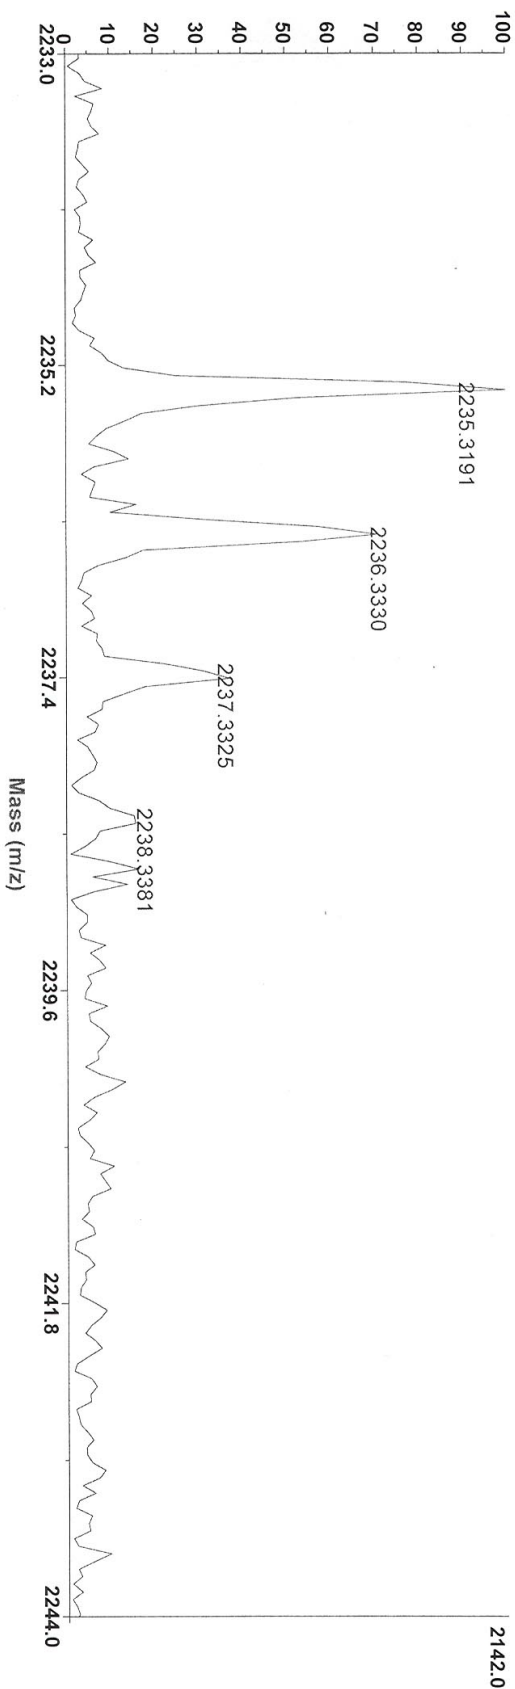

## Summary

Serial Number 347007026  
Instrument Name AB 347007026

## Spot

Plate Name 00330005386  
Plate Barcode 00330005386  
Spot Set Name MSMS I - 5386 - 50607  
Job Run Comments  
Spot Position  
Spot Name D7  
Spot Type 50613 - Jingdong Ye 7mer  
Location X Min Unknown  
Location X Max 16629.000  
Location Y Min 17364.000  
Location Y Max 29065.000  
Spot Run # 4

## Spectrum

Rejected Sub-spectra 0  
Calibration Type None  
Rejected Shots 0  
Update Default Calibration Disabled  
Stop Reason Specified signal to noise ratio met  
Total Accumulations 4  
Total Ion Count 9.863878e+006  
Total Shots 500  
Skip Job on Plate Calibration Failure Disabled  
Job-Wide Interpretation Disabled  
Configured for LCMS Experiments Disabled

## Acquisition

Method Name Refl (-) 500 5K 2Kfm V3000s  
Mass Analysis Type MS Reflector Negative Ion Mode  
CID Off  
CID Gas Type Atmosphere  
CID Gas Pressure Medium  
Metastable Suppressor Off  
Start Time 06/13/05 15:11:37  
Laser Intensity Range 2950 To 2950

## Processing

Processing Method Name Refl Neg SN=5  
Calibration Type Default  
Peak Count 116  
Tallest Peak Height 1.034536e+004  
Tallest Peak SN 279.4777  
Tallest Peak Mass 857.0168  
Tallest Peak Resolution 8069.7490  
Calibration Coefficients 1.250903e+002  
3.187997e-007  
2.273230e-006

## Interpretation

Interpretation Method Name <<none>>  
Pressures  
Source 2 1.8e-008  
TC Turbo 1.9e-002  
Reflector 2.8e-008  
Source 1 3.5e-008

**P1 nuclease digestion.** \*p(dN)<sub>12</sub>rU<sub>2</sub>CF<sub>2</sub>H(dN)<sub>12</sub> (or \*p(dN)<sub>12</sub>rU(dN)<sub>12</sub>) was incubated in P1 nuclease buffer in the presence of 0.01 mg/ml P1 nuclease (USB) for 10 min at 37 °C. The mixture was then heated at 90 °C for 1 minute, combined with gel loading buffer (final concentration: 50 mM Tris-HCl, pH 8, 3.5 M urea and 0.0025% (w/v) each of bromophenol blue and xylene cyanol) and separated by 20% sequencing PAGE. Figure S1 shows the digestion pattern. The shorter P1 digestion products of the CF<sub>2</sub> oligonucleotide, arising from cleavage upstream of the modification (12 nucleotides and less), comigrate with their wild-type counterparts during PAGE. This is expected, as these products lack the modification and therefore are identical to those produced from wild-type oligonucleotide. The 12mer was assigned using the oligonucleotide from which the modified CF<sub>2</sub> oligonucleotide was generated (Figure S1, lane 5). We observe no product corresponding to P1 cleavage at the site bearing the difluoromethyl group (13mer), suggesting that the modification hinders P1 activity. The longer P1 digestion products of the CF<sub>2</sub> oligonucleotide, arising from cleavage downstream of the modification (14 nucleotides and greater), migrate modestly slower than their wild-type counterparts, presumably due to the presence of the difluoromethyl modification. The species labeled as A and B in lanes 3 and 4 respectively, are present in the undigested controls (lanes 1 and 2, respectively) and most likely correspond to cleavage products arising from internal transphosphorylation at the ribose linkage.

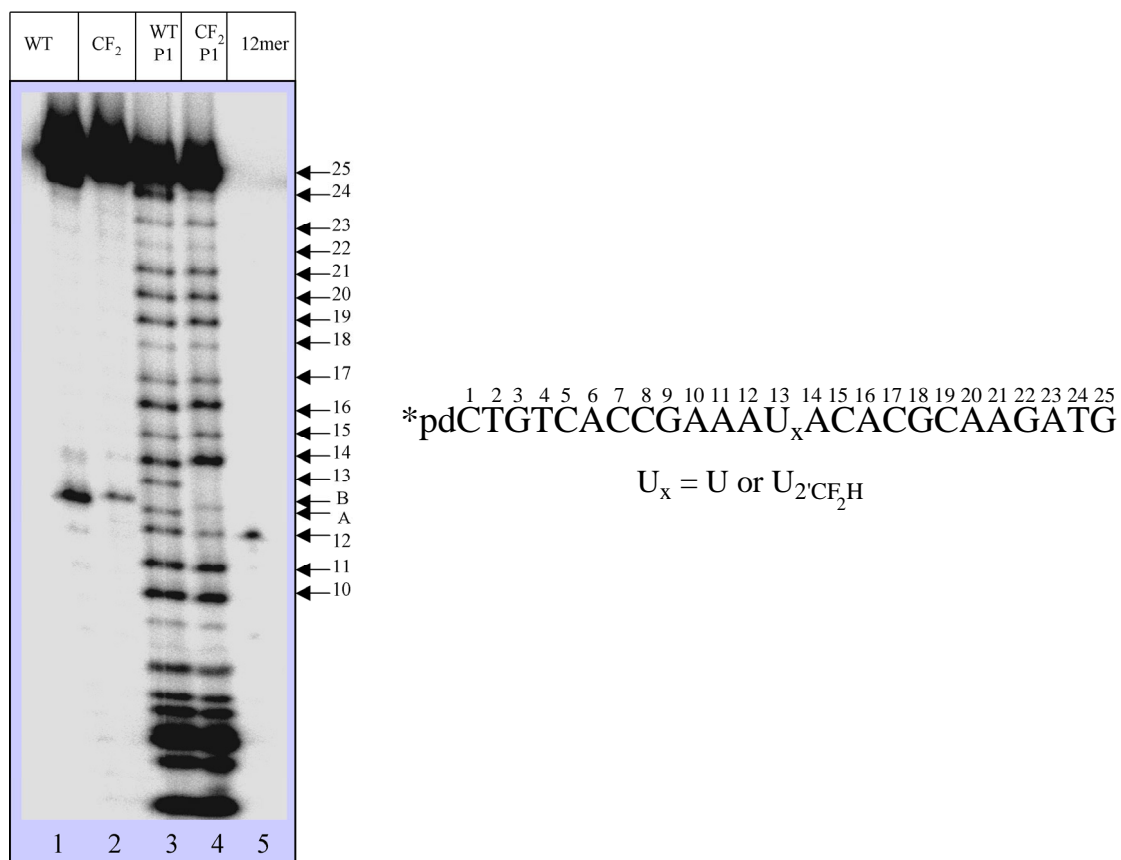

Figure S1. Nuclease P1 digestion of chimeric oligonucleotides containing uridine or 2'-C-β-difluoromethyluridine. Lane 1, WT, \*pd(CTGTCACCGAAA)rUd(ACACGCAAGATG), input; Lane 2, CF<sub>2</sub>, \*pd(CTGTCACCGAAA)rU<sub>2'CF<sub>2</sub>H</sub>d(ACACGCAAGATG), input; Lane 3, WT, with P1 nuclease; Lane 4, CF<sub>2</sub>, with P1 nuclease; Lane 5, 12mer, \*pd(CTGTCACCGAAA).
